# Supplementary material for: Dynamic cybergenetic control of bacterial co-culture composition via optogenetic feedback
Source: PubMed Central journal article supplement (PMC9381578; doi:10.1038/s41467-022-32392-z), 2022-08-16
Supplement: 41467_2022_32392_MOESM1_ESM.pdf [file 41467_2022_32392_MOESM1_ESM.pdf]

# Supplementary Information for

## Dynamic control over the composition of bacterial co-cultures via optogenetic feedback

Joaquín Gutiérrez Mena, Sant Kumar, Mustafa Khammash\*

\*Corresponding author. Email: [mustafa.khammash@bsse.ethz.ch](mailto:mustafa.khammash@bsse.ethz.ch)

This PDF file includes:

Supplementary Text Sections 1-3

Supplementary Figures 1-23

Supplementary Tables 1-2

# 1 Construction of *evotron* framework

## 1.1 eVOLVER sleeve re-design

### Hardware

We re-designed the eVOLVER sleeve as shown in Supplementary Figure 21 and Supplementary Figure 22 to accommodate new tube holder and vial cap designs resulting in stable and consistent OD sensor measurements (Supplementary Figure 3). We also integrated one blue LED (465nm, superbrightleds: RL5-B08-360) per sleeve to facilitate optogenetic stimulation of target cell culture when placed in the sleeve. This blue LED was connected to the vial electronic board by replacing the 90 degree photodiode (IR detector), shown in Supplementary Figure 22b and Supplementary Figure 19a. Since, our experiments involved cell cultures maintained at lower cell densities ( $OD < 0.2$ ), readings from 135 degree photodiode (IR detector) were enough to provide accurate OD measurements (thus, 90 degree photodiode was not required). Further, we also replaced the default M6 plugin (on the eVOLVER motherboard) with a PWM board(1) to power this additional LED, and re-programmed UC2 arduino (SAM21) to provide software control access for changing LED intensity in real-time during optogenetic experiments.

### Software

All CAD design files, codes and routines are available in this GitHub repository:

<https://github.com/santkumar/evotron.git> (Zenodo DOI 10.5281/zenodo.6908131)

## 1.2 Automated sampling platform design

### Hardware

We designed our automated sampling and measurement framework around Opentrons OT-2 liquid handling robot. The modified eVOLVER platform was placed inside the Opentron OT-2 robot replacing its deck, as can be seen in Supplementary Figure 23a. Three cleaning solution bottles (1- $H_2O$ , 2-Bleach (2%), 3- $H_2O$ ) were also placed on the OT-2 deck for cleaning the sample path after every sampling step. A sampling-needle was fixed onto the OT-2 pipette head by using a custom-designed 3D printed needle holder (Supplementary Figure 23a).

As seen in Supplementary Figure 23b, the sampling needle was attached to a flexible silicone tubing which provided a route for the sample to move into the flow-cytometer (Cytoflex S, Beckman Coulter) sampling vial via a peristaltic sampling pump (Intellicyt peristaltic pump). Another tubing and waste-removal pump was set up to remove the residual sample from flow-cytometer sampling vial after measurement. A controller (Arduino Mega 2560) was incorporated in the framework providing software control access of the OT-2 robot (serial communication), sampling and waste-removal pumps (TTL signaling). The control computer was connected to the OT-2 and eVOLVER platforms via WiFi communication, and was set up to communicate with the arduino controller serially (Figure 3b).

### Software

All CAD design files, codes and routines are available in this GitHub repository:

<https://github.com/santkumar/evotron.git> (Zenodo DOI 10.5281/zenodo.6908131)

### Pseudo Code

These are the synchronized steps performed during an automated sampling event:

1. Start the sampling pump.
2. Move the OT-2 pipette head to a desired eVOLVER sleeve location (where our target cell culture is maintained within OD range 0.1-0.15 in a glass vial).
3. Lower the OT-2 pipette head so that the sampling-needle is dipped into the cell culture, wait for 3 seconds (for the sampling pump to extract  $\sim 0.5$ ml of culture into the sampling tubing), and then move it up.
4. Wait for 40 seconds so that the extracted sample is pulled and completely discharged into the flow-cytometer sampling vial, then stop the sampling pump.
5. Start the flow-cytometer measurement.
6. Once measurement is done, start the waste-removal pump and wait for 10 seconds so that the residual sample is completely pumped out of the flow-cytometer sampling vial, and then stop the waste-removal pump.
7. Start the sampling pump.
8. Move the OT-2 pipette head to the first cleaning solution (sterile  $H_2O$ ) bottle location.
9. Lower the OT-2 pipette head so that the sampling-needle is dipped into the cleaning solution, wait for 4 seconds (for the sampling pump to extract  $\sim 0.7$ ml of cleaning solution into the sampling tubing), and then move it up.
10. Wait for 40 seconds so that the extracted cleaning solution is pulled and completely discharged into the flow-cytometer sampling vial, then stop the sampling pump.
11. Start the waste-removal pump and wait for 10 seconds so that the cleaning solution is completely pumped out of the flow-cytometer sampling vial, and then stop the waste-removal pump.
12. Move the OT-2 pipette head to the second cleaning solution (2% bleach solution) bottle location.
13. Lower the OT-2 pipette head so that the sampling-needle is dipped into the bleach solution, wait for 6 seconds (for the sampling pump to extract  $\sim 1$ ml of bleach solution into the sampling tubing), and then move it up.
14. Wait for 40 seconds so that the extracted bleach solution is pulled and completely discharged into the flow-cytometer sampling vial, then stop the sampling pump.
15. Wait for 10 seconds so that the bleach solution has sufficient time to disinfect the sampling tubing and the flow-cytometer sampling vial.
16. Start the waste-removal pump and wait for 10 seconds so that the bleach solution is completely pumped out of the flow-cytometer sampling vial, and then stop the waste-removal pump.
17. Move the OT-2 pipette head to the third cleaning solution (sterile  $H_2O$ ) bottle location.
18. Lower the OT-2 pipette head so that the sampling-needle is dipped into the cleaning solution, wait for 8 seconds (for the sampling pump to extract a bit more than 1ml of cleaning solution into the sampling tubing), and then move it up.
19. Wait for 40 seconds so that the extracted cleaning solution is pulled and completely discharged into the flow-cytometer sampling vial, then stop the sampling pump.
20. Start the waste-removal pump and wait for 10 seconds so that the cleaning solution is completely pumped out of the flow-cytometer sampling vial, and then stop the waste-removal pump.
21. The automated sampler is now ready to perform the next sampling.

**Note:**

- During a closed-loop control experiment, the feedback controller computation routine is run on measurements just after the flow-cytometer measurement is done in step 6. Once the computation is over, the LED (integrated on the respective eVOLVER sleeve of the target cell culture vial) stimulation intensity is set as per the value computed by this controller. These controller computations are carried out in parallel with cleaning steps 7-20.
- When performing all the above mentioned steps, a single automated sampling event takes approx. 5 and half minutes to finish. This was the limiting factor in deciding how many culture vials (5 in our case even though the eVOLVER platform has 16 parallel culture sleeves) can be maintained and experimented with in parallel, given that the frequency of control input (light intensity) update in our co-culture composition control experiments was set to be once every 30 minutes.
- **Comparison with ReacSight framework (2):** A recently published article (2) proposed a similar hardware-software framework centered around a pipetting robot (Opentrons OT-2) enabling automated sampling and measurement capabilities. In contrast to our *evotron* framework, this ReacSight approach involves moving culture samples via sampling lines to the OT-2 deck and then transferring them to a measurement device (positioned within the OT-2 pipette head accessible region) using default pipettes available on OT-2. To achieve automated sampling, measurement and reactive control capability, one can adopt any of the two (*evotron* and ReacSight) strategies depending on the application, culture platforms, and measurement devices. Our *evotron* framework facilitates integration of any suitable measurement device, and does not require positioning them within the OT-2 pipette head accessible region, which is required in the ReacSight setup. On the other hand, we place the culture platform on the deck of the OT-2 robot, which is placed outside of the OT-2 in ReacSight approach.

## 2 Formulation of the mathematical modeling framework

### Unit conversion

We note that the cellular protein density of *E. coli* is approximately independent of the growth rate (3). Because of this, we can estimate a factor that converts protein concentrations into fractions of the proteome and viceversa. We define the proteome fraction of a given protein type  $X$  as

$$\Phi_X = \frac{M_X[\text{aa}]}{M_{\text{cell}}[\text{aa}]} \quad (1)$$

where  $M_X$  is the mass of all protein copies of type  $X$  and  $M_{\text{cell}}$  is the mass of all proteins in the cell, both in units of the average mass of an amino acid. Denoting the mass of a single copy of  $X$  by  $n_X$  and the number of protein copies by  $N_X$ , we can relate  $\Phi_X$  to the concentration  $c_X$  in the following way:

$$\begin{aligned} \Phi_X &= \frac{M_X[\text{aa}]}{M_{\text{cell}}[\text{aa}]} = n_X[\text{aa}] \frac{N_X[\text{molecules}]}{M_{\text{cell}}[\text{aa}]} \\ &= n_X[\text{aa}] \frac{V_{\text{cell}}[\text{fL}]}{M_{\text{cell}}[\text{aa}]} \frac{N_X[\text{molecules}]}{V_{\text{cell}}[\text{fL}]} \\ &= n_X[\text{aa}] \rho_{\text{cell}}^{-1} c_X \left[ \frac{\text{molecules}}{\text{fL}} \right] \end{aligned} \quad (2)$$

where we have denoted the cell volume by  $V_{\text{cell}}$  and introduced the cellular protein density, which is approximately (4)  $\rho_{\text{cell}} \approx \frac{2 \cdot 10^9 \text{ aa}}{1 \text{ fL}} = 2 \cdot 10^9 \frac{\text{aa}}{\text{fL}}$ . In the following sections, we use  $\frac{n_X}{\rho_{\text{cell}}}$  as an inter-conversion factor between protein concentrations and proteome mass fractions.



## Proteome partition model of bacterial physiology

The framework for host-aware modeling of synthetic genetic circuits we present in this study is based on the proteome-partition model put forward by Scott *et al.* (5). In this section, we provide a brief summary of their model, focusing on the equations that are central to the development of our approach. For further details and derivations of these equations from first principles, we refer the reader to the original publications (5, 6). For examples on how these types of models have been applied to a range of biological problems, see e.g. (7–9).

The model proposed by Scott *et al.* attempts to explain key observations about how the macromolecular composition of *E. coli* varies when the growth rate of the cell changes. The composition of the cell, i.e. the relative amounts of its component proteins, is dictated by its gene expression profile. Therefore, the relation between the composition and the growth rate is ultimately a connection between gene expression and the physiology of the cell, for which growth rate is the most direct readout. The laws governing this relation are of high importance for the prediction of how synthetic genetic circuits behave in the cellular context.

Despite the complexity of a cell, the empirical link between aspects of its macromolecular composition and its growth rate turns out to be remarkably simple. At the core of the model of Scott *et al.* are two linear relations that were determined experimentally, which relate the fraction of the proteome made up by ribosomes and the growth rate (depicted schematically in Figure 4a). The first one applies when the growth rate is changed by modulating the quality of nutrients in the media and it implies a positive correlation between ribosomal content and growth rate:

$$\lambda = \gamma_0 (\Phi_R - \Phi_{R_0}) \quad (3)$$

where  $\lambda$  represents the growth rate,  $\Phi_R$ , the ribosomal mass fraction and  $\Phi_{R_0}$ , the Y-offset extrapolated from experiments which corresponds to ribosomes that are not actively engaged in translation. The proportionality constant  $\gamma_0$  can be shown to correspond to the translation rate.

The second linear relation is revealed when growth rate is modulated by translation inhibition, e.g. by exposing *E. coli* to increasing concentrations of chloramphenicol in the presence of saturating nutrient availability. In that case, the cell upregulates its ribosome content at lower growth rates, in response to the increasing inhibition of translation brought about by the antibiotic:

$$\lambda = \nu (\Phi_R^{\max} - \Phi_R). \quad (4)$$

where,  $\nu$  characterizes the quality of the available nutrients and  $\Phi_R^{\max}$  is again the Y-offset, i.e. the maximal ribosome content that is theoretically possible.

Scott *et al.* propose that the simplest way to account for these linear growth laws is to assume a partition of the proteome in three fractions. The existence of a constant fraction  $\Phi_Q$ , that does not vary as the growth rate changes, is deduced from the fact that the ribosomal fraction cannot be increased further than a maximum of  $\Phi_R^{\max} = 1 - \Phi_Q$ . This fixed fraction is hypothesized to represent house-keeping proteins, whose concentration is kept constant by negative feedback mechanisms. The ribosomes and associated proteins required for translation constitute a further significant fraction of the proteome,  $\Phi_R$ . It's magnitude is closely associated to the growth rate of the cell, as described by the growth laws, equations 3 and 4. Finally, since  $\Phi_Q$  is fixed, there needs to be a third fraction that accommodates for changes in  $\Phi_R$ . This variable fraction,

$$\Phi_P = 1 - \Phi_Q - \Phi_R = \Phi_R^{\max} - \Phi_R = \frac{\lambda}{\nu} \quad (5)$$

is interpreted as the group of proteins responsible for catabolism, as well as other proteins whose expression is unregulated, i.e. not subject to any of the homeostatic mechanisms that stabilize components of the Q-fraction. It

follows the exact opposite behavior to the ribosomal fraction  $\Phi_R$ , i.e. decreasing with increasing nutrient quality and decreasing with increasing inhibition of ribosomes. Crucially for the derivation of our model framework below, constitutive genes were shown to belong to this category(5) (Supplementary Figure 20).

The growth laws, equations 3 and 4, together with the constraint of having a finite proteome size,

$$\Phi_Q + \Phi_R + \Phi_P = 1 \quad (6)$$

are solved by Scott *et al.* to arrive at expressions for the growth rate and ribosomal fraction, that depend only on three parameters: the nutritional capacity  $\nu$ , the translational capacity  $\gamma_0$  and the maximally-possible ribosomal fraction  $\Phi_R^{\max}$ .

$$\lambda(\gamma_0, \nu, \Phi_R^{\max}) = (\Phi_R^{\max} - \Phi_{R_0}) \frac{\gamma_0 \nu}{\gamma_0 + \nu} \quad (7)$$

$$\Phi_R(\gamma_0, \nu, \Phi_R^{\max}) = (\Phi_R^{\max} - \Phi_{R_0}) \frac{\nu}{\gamma_0 + \nu} + \Phi_{R_0} \quad (8)$$

Finally, Scott *et al.* also discussed what would happen if non-toxic, exogenous proteins are expressed in the cell. Exogenous gene expression would introduce a further proteome fraction,  $\Phi_S$  ( $S$  for *synthetic*), which results in growth defects because it restricts the fraction of the proteome that is available for ribosomes and catabolic proteins (effectively decreasing the value of  $\Phi_R^{\max}$ ). With the extra proteome fraction, the finite proteome constraint becomes

$$\Phi_Q + \Phi_R + \Phi_P + \Phi_S = 1 \quad (9)$$

which leads to equations for the growth rate and ribosomal fraction that explicitly depend on  $\Phi_S$ :

$$\lambda(\gamma_0, \nu, \Phi_R^{\max}, \Phi_S) = (\Phi_R^{\max} - \Phi_{R_0} - \Phi_S) \frac{\gamma_0 \nu}{\gamma_0 + \nu} \quad (10)$$

$$\Phi_R(\gamma_0, \nu, \Phi_R^{\max}, \Phi_S) = (\Phi_R^{\max} - \Phi_{R_0} - \Phi_S) \frac{\nu}{\gamma_0 + \nu} + \Phi_{R_0} \quad (11)$$

Note that this assumes a synthetic proteome fraction that is fixed, as is the case when a neutral protein product is expressed constitutively. Furthermore,  $\Phi_S$  enters the equations as an extra parameter. Scott *et al.* express an exogenous protein in *E. coli* and measure the fraction of the proteome occupied by that protein. They show that the relation between that fraction and the growth defects observed can be quantitatively described by equation 10.

The parameters  $\nu$ ,  $\gamma_0$  and  $\Phi_R^{\max}$  were estimated by Scott *et al.* for a wide range of conditions encompassing cells growing in different media and with different concentrations of chloramphenicol. Most studies on synthetic genetic circuits in *E. coli* are conducted in a laboratory setting under comparable conditions, e.g. the performance of a circuit is commonly evaluated in cells that grow exponentially at 37°C with saturated availability of oxygen and a well-defined growth medium. Under such conditions,  $\gamma_0$  and  $\Phi_R^{\max}$  do not vary much, which makes it possible to use the values estimated in (5). The above equations can then be used to predict growth defects due to burden, provided that the amount of synthetic proteins being expressed is known (with respect to the total protein mass of the cell) and the single missing parameter,  $\nu$ , is determined.  $\nu$  can be estimated by measuring the growth rate of the strain of interest in the chosen media.

## Host-aware modeling framework for synthetic genetic circuits

Expression of heterologous genes consumes cellular resources and reduces the growth rate of cells. In turn, limitations in the cellular gene expression machinery impact the performance of synthetic circuits(10). Here, we develop a modeling framework that captures this two-way interference and that can be seamlessly incorporated into conventional ODE models with little extra complexity and adding no extra free parameters.

In the proteome allocation model of Scott *et al.* summarized above, equations 10 and 11 quantify the impact of expressing heterologous genes on the cellular resources ( $\Phi_R$ ) and the growth rate ( $\lambda$ ). They are valid for balanced exponential growth. However, modelers are often interested in understanding the dynamics of circuits and not only their steady-state behavior. Moreover, the proteome fraction occupied by the circuit,  $\Phi_S$ , which enters the equations as a free parameter, cannot be determined experimentally in most practical cases. The equations also do not explicitly quantify the effect that the limited pool of cellular resources has on the performance of a circuit.

### Derivation of the framework

In the following, we assume that the relations presented in the previous section also apply to the transient dynamics of a synthetic genetic circuit and not only at steady-state. To address the other issues, we begin by considering the simplest case of a circuit composed by a single, constitutively-expressed gene,  $x$ . The study by Scott *et al.* demonstrated that this type of unregulated expression would fall under the P-type proteome fraction(5, 8), which follows the opposite rules that apply to the ribosomal fraction (eq. 5). This means that an appropriate host-aware model of this simple circuit should recover two general trends:

1. the proteome fraction of  $X$  should decrease linearly with growth rate, when growth is modulated by nutrient quality
2. The proteome fraction of  $X$  should increase linearly with growth rate, when growth is modulated by translational capacity and the slope of this increase should depend on the nutrient quality.

Conventional models of constitutive expression represent transcription and translation as birth-death processes:

$$\begin{aligned}\frac{dm_X}{dt} &= \omega - \delta_m m_X \\ \frac{dX}{dt} &= \alpha m_X - \lambda X\end{aligned}\tag{12}$$

where mRNA is transcribed at a rate  $\omega$  and degraded at a rate  $\delta_m$  and proteins are translated at a rate  $\alpha$  and diluted through cell growth. At steady-state, the synthetic proteome fraction is given by

$$\Phi_S = \Phi_X = \frac{n_X}{\rho_{cell}} \bar{X} = \frac{n_X \omega \alpha}{\rho_{cell} \delta_m \lambda}\tag{13}$$

which clearly does not meet the requirements stated above (Supplementary Figure 20a), since it scales as  $1/\lambda$ .

Our goal is to find a simple expression that captures how the required links between growth rate and constitutive gene expression listed above, may arise from coupling the circuit to the gene-expression machinery of the cell. As a first step, we introduce a dependency of the circuit on the cellular translation machinery, which is known to be the most important resource bottleneck(11) in *E. coli*. For simplicity, we assume mass action kinetics, with  $R$  representing a unit of *active* translational resources<sup>1</sup> (active ribosome plus associated factors required for protein production). The

---

<sup>1</sup>For a possible derivation of this mass-action term from a model of peptide elongation, see(12)

ODEs become<sup>2</sup>

$$\begin{aligned}\frac{dm_X}{dt} &= \omega - \delta_m m_X \\ \frac{dX}{dt} &= \alpha m_X R - \lambda X\end{aligned}\tag{14}$$

We can convert the concentration of active translational machinery to its proteome mass fraction ( $\Phi_R - \Phi_{R_0}$ ) and then use the first growth law (eq. 3) to express it as a function of the growth rate

$$R = \frac{\rho_{cell}}{n_R} (\Phi - \Phi_{R_0}) = \frac{\rho_{cell}}{n_R \gamma_0} \lambda\tag{15}$$

With this, the ODE for the protein concentration becomes

$$\frac{dX}{dt} = \alpha \frac{\rho_{cell}}{n_R \gamma_0} m_X \lambda - \lambda X\tag{16}$$

which would imply that at steady-state the concentration (and mass fraction) of the constitutive protein is independent of the growth rate (Supplementary Figure 20b),

$$\Phi_S = \frac{n_X}{\rho_{cell}} \bar{X} = \frac{n_X \omega \alpha}{n_R \gamma_0 \delta_m}\tag{17}$$

again not capturing the expected behavior of a constitutive gene.

In order to determine what the correct expression would look like, we take a more careful look at equation 13. The synthetic proteome fraction scales inversely with growth rate, because the dilution term is set by the growth rate. From equation 13, then we can infer that the production term in the ODE describing the protein concentration must scale as  $\frac{\lambda^2}{\nu}$ , if the synthetic proteome fraction is to be proportional to the P-type fraction

$$\Phi_S \propto \Phi_P = \frac{\lambda}{\nu}\tag{18}$$

We interpret this result in the following way. The squared dependency on growth rate arises quite naturally if we consider that the availability of transcriptional machinery also depends on the cellular growth rate. Here, we refer to a recent study by Balakrishnan *et al.*, in which the authors monitor transcriptome- and proteome-wide changes under different growth conditions, in order to investigate at a very detailed level how the observed growth-rate dependencies arise naturally from the central dogma of molecular biology(13).

Balakrishnan *et al.* report that the mRNA and protein levels correlate linearly for the majority of genes in *E. coli*. Moreover, after carefully quantifying the contributions of each step of gene expression, they conclude that the concentrations of proteins are dominantly set by the transcriptional output of their genes and not by other factors, such as translation initiation rates, mRNA degradation rates or gene dosage in replicating chromosomes. Balakrishnan *et al.* further estimate that the concentration of active RNA polymerase is tightly coupled to the concentration of active ribosomes. Therefore, it exhibits the same dependencies on growth rate as the ribosomal proteome fraction, i.e. the growth laws described in the previous section. Since the actual concentration of RNA polymerase components seems to remain constant under different growth conditions, the authors present evidence for a mechanism by which the availability of *active* RNA polymerase is modulated by the anti-sigma factor Rsd, which indeed exhibits the

---

<sup>2</sup>To keep notation simple, we have left  $\alpha$  as a symbol for the translation rate, although it must be noted that it now has different units compared to the quantity in eq. 12. The same will be true below, when we consider the role of transcriptional resources and the dependency on the media quality.

expected growth-rate dependencies.

Based on the findings of Balakrishnan *et al.*, we now consider that the transcription rate of the constitutive gene reflects the overall availability of RNA polymerase, as is the case for the translation rate and the active ribosomes

$$\frac{dm_X}{dt} = \omega \text{RNAP} - \delta_m m_X \quad (19)$$

Since Balakrishnan *et al.* determined that the concentration of active RNA polymerase correlates positively with growth rate, we set

$$\text{RNAP} = \beta \lambda \quad (20)$$

so that the ODE describing the mRNA concentration becomes

$$\frac{dm_X}{dt} = \tilde{\omega} \lambda - \delta_m m_X \quad (21)$$

where we have absorbed the proportionality factor into the transcription rate.

With this, the equation for the synthetic proteome fraction becomes

$$\Phi_S = \frac{n_X}{\rho_{cell}} \bar{X} = \frac{n_X \tilde{\omega} \alpha}{n_R \gamma_0 \delta_m} \lambda \quad (22)$$

This expression looks already more promising, since it is proportional to the growth rate. However, it does not distinguish between cases in which the growth rate is varied through changes in nutritional capacity or translational capacity (Supplementary Figure 20c). Comparison to eq. 18 reveals that in order to achieve a behavior that does distinguish these two cases, there is still a factor  $\frac{1}{\nu}$  missing.

It is less straightforward to derive the presence of this factor from first principles. However, we note that Scott *et al.* propose that the observed difference between the behavior of the P-sector and the R-sector reflects the balance between catabolic and anabolic fluxes in *E. coli*(5, 6). The factor  $\frac{1}{\nu}$  captures this overall regulatory strategy, which affects a large portion of genes in parallel.

Since Balakrishnan *et al.* provide evidence that the concentrations of proteins are set foremost by the transcriptional activity, we here assume that the factor  $\frac{1}{\nu}$  enters at that stage of the gene expression process. The final model for the expression of a constitutive gene thus becomes

$$\begin{aligned} \frac{dm_X}{dt} &= \tilde{\omega} \frac{\lambda}{\nu} - \delta_m m_X \\ \frac{dX}{dt} &= \tilde{\alpha} m_X \lambda - \lambda X \end{aligned} \quad (23)$$

where we have absorbed the constants  $\frac{\rho_{cell}}{n_R \gamma_0}$  into an effective translation rate  $\tilde{\alpha}$ .

These final equations have the same number of free parameters than the conventional model of the constitutive gene we started from. The nutritional capacity  $\nu$  is a property of the media in which the cells are grown and it can be easily determined by measuring the growth rate of the strain in the absence of the circuit and then solving for  $\nu$  in eq.10. We note that the choice of adding the factor  $\frac{1}{\nu}$  to the transcriptional step is arbitrary. It could also be added to the translation step and still the predictions at the protein level would be consistent with the bacterial growth laws. Moreover, if the circuit of interest operates in a context where the media is fixed and there are no changes in nutrient quality, it becomes unnecessary to consider the factor  $\frac{1}{\nu}$ , since it can be absorbed into the production constants  $\tilde{\omega}$  or

$\tilde{\alpha}$ .

Here, we have simply added an explicit growth-rate dependency to the production rates of mRNA and protein to reflect the fact that these depend on the physiological state of the cell through their reliance on the host’s gene expression machinery. As Supplementary Figure 20d shows, our modified equations are able to capture the expected qualitative behavior of a constitutive gene, both in the case when media quality is modulated and when the translational machinery is inhibited by a bacteriostatic antibiotic. Since the general dependence on the host gene-expression machinery does not only apply to constitutive genes, but to any heterologous gene that forms part of a synthetic network of genes<sup>3</sup>, in the following section we generalize the framework derived here to an arbitrary synthetic genetic circuit.

## General Formulation of the framework

The host-aware framework we propose here can be applied to any arbitrary synthetic genetic circuit. It consists of simple modifications to a conventional ODE model, which incorporate a two-way coupling between the circuit and the host. The circuit impacts the host by sequestering cellular resources, which causes a reduction in the growth rate. The host influences the performance of the circuit, because the latter depends on the availability of cellular gene-expression machinery and this is tightly regulated in accordance to the host’s physiological state.

Consider a generic synthetic genetic circuit composed of  $u$  genes that are introduced into *E. coli* to produce proteins  $X_1, \dots, X_u$ . A conventional model of such a system will consist of  $2u$  ordinary differential equations, describing the mRNA and protein concentrations of the circuit’s components. To these ODEs, we add the factors derived in the previous section to the production rates of mRNA and protein, so that they take the form

$$\begin{aligned}\frac{dm_{X_i}}{dt} &= \tilde{\omega}_i T_i(\mathbf{m}_X, \mathbf{X}) \frac{\lambda}{\nu} + F_i(\mathbf{m}_X, \mathbf{X}) - \delta_i m_{X_i} \\ \frac{dX_i}{dt} &= \tilde{\alpha}_i m_{X_i} \lambda + G_i(\mathbf{m}_X, \mathbf{X}) - \lambda X_i\end{aligned}\tag{24}$$

with  $i = 1, \dots, u$ . The collections of functions  $\mathbf{F}(\mathbf{m}_X, \mathbf{X})$  and  $\mathbf{G}(\mathbf{m}_X, \mathbf{X})$  describe potential interactions between the components of the circuits at the mRNA and protein level, respectively, and the functions  $\mathbf{T}(\mathbf{m}_X, \mathbf{X})$  reflect potential regulatory input at the transcriptional level.

The explicit dependency of the production and dilution rates on the growth rate reflects the impact of resource availability and host growth on the concentration of circuit components. To get an explicit expression for the growth rate, which reflects the impact of the circuit on the host, we make use of the expressions derived by Scott *et al.*<sup>4</sup> for the case of heterologous gene expression (eq. 10).

We can use the conversion factor derived above to calculate the proteome fraction occupied by the proteins in the circuit at any particular point in time:

$$\Phi_S = \frac{\sum_{i=1}^u n_{X_i} X_i}{\rho_{cell}}\tag{25}$$

This can in turn be inserted into equation 10 to obtain an explicit expression for the instantaneous growth rate

$$\lambda(\Phi_S) = (\Phi_R^{\max} - \Phi_{R_0} - \Phi_S) \frac{\gamma_0 \nu}{\gamma_0 + \nu}\tag{26}$$

<sup>3</sup>This excludes genes whose expression does not depend on cellular factors, such as genes transcribed by exogenous polymerases or translated by orthogonal ribosomes(14).

<sup>4</sup>This assumes that the dynamics of the synthetic circuit can be taken to be in quasi-equilibrium compared to the dynamics of the host’s physiology. We simply assume this here, since this results in model predictions that match the experimental data for our circuit of interest.

Equations 24, 25 and 26 form a closed system of  $2u$  ODEs and 2 algebraic equations that can be simulated to approximate the dynamic behavior of the synthetic genetic circuit in the context of an exponentially growing *E. coli* host.

## Model parameters

Under the growth conditions investigated by Scott *et al.*(5), the estimated values for  $\Phi_R^{\max}$ ,  $\Phi_{R_0}$  and  $\gamma_0$  were largely constant. As long as the cells under consideration are grown under similar conditions<sup>5</sup>, which will be true of most cases in a laboratory environment, the values they determined for these three parameters can be used.

Apart from these, the number of amino acids that compose each protein,  $n_{X_i}$  is known, as well as the cellular protein density  $\rho_{cell}$ , which is largely growth-rate independent. The nutritional capacity  $\nu$ , which describes the quality of the media, can be easily determined by measuring the growth rate of the strain in the absence of the synthetic genetic circuit ( $\Phi_S = 0$ ) and substituting in equation 26:

$$\nu = \frac{\gamma_0 \lambda}{\gamma_0 (\Phi_R^{\max} - \Phi_{R_0}) - \lambda} \quad (27)$$

In that case, the framework we propose contains the same amount of free parameters as a conventional model that does not consider the host, that is  $u$  transcription rates,  $u$  mRNA degradation rates,  $u$  translation rates plus any number of parameters required to describe the interactions between circuit species. This framework then has the advantage that it can be easily incorporated into an existing ODE model and that it can capture the qualitative trends expected from a host-aware model without adding complexity or increasing the risk of overfitting. The parameter values we use in this study are summarized in Supplementary Table 1.

## Model of photophilic strain

In this section, we apply the framework formulated above to the case of the growth-control circuit in the photophilic strain. The circuit consists of the two parts of a split opto-T7, which dimerizes in the presence of blue light to produce an active complex that transcribes mRNA coding for the resistance enzyme chloramphenicol acetyltransferase (CAT).

We begin by presenting the final result and then derive the equations in the following sections. Our model is composed of three ODEs and two algebraic equations:

$$\frac{dT_T}{dt} = \hat{\alpha}_T \frac{\lambda^2}{\nu} - \lambda T_T \quad (28)$$

$$\frac{dT_D}{dt} = h_{ON}(L) (T_T - 2 (T_D + g_{ON}(T_D)))^2 - \lambda (T_D + g_{ON}(T_D)) \quad (29)$$

$$\frac{dC}{dt} = \hat{\alpha}_C \frac{\lambda}{\nu} g_{ON}(T_D) - \lambda C \quad (30)$$

$$\Phi_S(t) = \frac{n_T T_T(t) + n_C C(t)}{\rho_{cell}} \quad (31)$$

$$\lambda(t) = (\Phi_R^{\max} - \Phi_{R_0} - \Phi_S(t)) \frac{\nu \gamma_0}{\gamma_0 + \nu \left( 1 + \frac{\frac{A_E}{K_D}}{1 + \left( \frac{C(t)}{\kappa K_C} \right)^{n_C}} \right)} \quad (32)$$

The ODEs describe the evolution of the concentration of the circuit's proteins: T7-monomers,  $T_T$ , T7-dimers,  $T_D$  and CAT,  $C$ . For simplicity, we have assumed fast mRNA dynamics for all species (quasi-steady state), which in our

<sup>5</sup>Carbon-limited exponential growth at 37°C with saturating amounts of carbon source, in the presence or absence of translation-inhibiting antibiotics.

framework corresponds to:

$$m_{X_i}^{qss} = \frac{\tilde{\omega}_i}{\delta_i} \frac{\lambda}{\nu} \quad (33)$$

and we have absorbed the transcription and mRNA-degradation rates into an effective protein-production rate  $\tilde{\alpha}_i$ .

The light-dependent T7-dimerization rate is modeled by the general expression

$$h_{ON}(L) = h_{ON}^{min} + (h_{ON}^{max} - h_{ON}^{min}) \frac{L^{n_L}}{K_L^{n_L} + L^{n_L}} \quad (34)$$

where  $L$  is the blue-light intensity, and the factor

$$g_{ON}(T_D) = N_p \frac{T_D^{n_G}}{K_G^{n_G} + T_D^{n_G}} \quad (35)$$

captures the concentration of actively transcribing T7-dimers.

The difference between equation 32 and equation 26 reflects the effect of chloramphenicol inhibition.

The equations used here are mainly phenomenological in nature. Nevertheless, their utility is supported by the good results obtained, both in recapitulating the gene expression and growth rate dynamics of the photophilic strain, as well as in predicting the trajectories of the closed-loop co-culture. In the following sections, we provide the rationale behind the choice of terms for our model.

## Production of CAT

To get a simple description of transcription by T7 polymerase, we treat it as a two step process

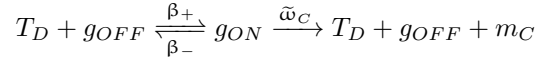

First, a T7-dimer first binds reversibly to a copy of the gene which is in an inactive state,  $g_{OFF}$ , to produce an active complex,  $g_{ON}$ . The complex then directly produces a unit of CAT mRNA,  $m_C$ , thereby releasing the T7-dimer and the gene, which reverts back to its OFF state. Finally, the CAT gene resides on a plasmid, whose copy number,  $N_p = g_{OFF} + g_{ON}$ , we assume is kept constant through a balance between plasmid replication and dilution:

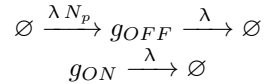

These reactions lead to the following ODEs for the time evolution of the inactive and active gene copies

$$\begin{aligned} \frac{dg_{OFF}}{dt} &= \lambda N_p - \beta_+ g_{OFF} T_D + (\beta_- + \tilde{\omega}_C) g_{ON} - \lambda g_{OFF} \\ \frac{dg_{ON}}{dt} &= \beta_+ g_{OFF} T_D - (\beta_- + \tilde{\omega}_C) g_{ON} - \lambda g_{ON} \end{aligned} \quad (36)$$

Assuming that these dynamics evolve at a faster timescale than that of processes related to the changes in cell growth and physiology, we consider steady-state for these equations, which leads to the following expression for the concentration of active gene copies



$$g_{ON} = N_p \frac{T_D}{T_D + \frac{\beta_- + \tilde{\omega}_C}{\beta_+} - \frac{\lambda}{\beta_+}} \approx N_p \frac{T_D}{T_D + K_G} \quad (37)$$

where we have used the fact that the binding reaction of the T7 to its promoter is orders of magnitude faster than cell growth and we have introduced  $K_G = \frac{\beta_- + \tilde{\omega}_C}{\beta_+}$  as a parameter that relates to the affinity of the T7 to its promoter sequence. We finally add a hill-coefficient to this expression to be able to capture higher degrees of non-linearity in the system, leading to the expression in equation 35.

With this, and assuming the mRNA concentration is in quasi-steady state (eq. 33), we can write the ODE for the concentration of CAT as

$$\frac{dC}{dt} = \hat{\alpha}_C \frac{\lambda}{\nu} N_p \frac{T_D^{n_G}}{T_D^{n_G} + K_G^{n_G}} - \lambda C \quad (38)$$

where we have again absorbed the parameters related to transcription into the effective production rate  $\hat{\alpha}_C$ . Note that, in this equation, the protein production rate scales only linearly with the growth rate. This is because, in the derivation of our framework, the square dependency arises from the fact that both the ribosomes and RNA polymerase introduce a linear dependency on the growth rate. However, since CAT is not transcribed by the endogenous *E. coli* polymerase, we let it scale linearly with the growth rate to reflect the fact that it only depends on the cellular translation machinery.

## Light-dependent dimerization

We begin by representing light-mediated dimerization of the split T7 through the following reversible reaction

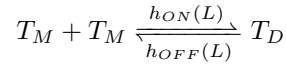

In reality, the opto-T7 is a heterodimer, composed of two different N-terminal, nMag-T7<sub>N-Ter</sub>, and C-terminal, pMag-T7<sub>C-Ter</sub>, parts. However, for simplicity we assume that we can model the opto-T7 as a homodimer that results from the light-promoted fusion of two identical monomer units,  $T_M$ .

We chose a general Hill-function, each with 4 free parameters, for the forward and backward rates of the dimerization reaction, in order to capture the dynamics of this process accurately

$$\begin{aligned} h_{ON}(L) &= h_{ON}^{min} + (h_{ON}^{max} - h_{ON}^{min}) \frac{L^{n_{LON}}}{K_L^{n_{LON}} + L^{n_{LON}}} \\ h_{OFF}(L) &= h_{OFF}^{max} - (h_{OFF}^{max} - h_{OFF}^{min}) \frac{L^{n_{LOFF}}}{K_L^{n_{LOFF}} + L^{n_{LOFF}}} \end{aligned} \quad (39)$$

The ODE for the T7 dimers includes the dimerization and transcription reactions

$$\frac{dT_D}{dt} = h_{ON}(L) T_M^2 - h_{OFF}(L) T_D - \beta_+ g_{OFF} T_D + (\beta_- + \tilde{\omega}_C) g_{ON} - \lambda T_D \quad (40)$$

$$= h_{ON}(L) T_M^2 - h_{OFF}(L) T_D - \lambda g_{ON} - \lambda T_D \quad (41)$$

However, simulations revealed that the dynamics of  $T_D$  were only weakly influenced by the dissociation reaction, in contrast to the forward reaction, which scales with the square of the monomer concentration. Because of this

and in order to reduce the number of free parameters, we neglected the dissociation reaction, effectively considering dimerization as an irreversible process. This leads to the simpler equation

$$\frac{dT_D}{dt} = h_{ON}(L) T_M^2 - \lambda (g_{ON} + T_D) \quad (42)$$

Finally, we chose to keep track of the concentration of *total* T7-monomers,  $T_T$ , instead of that of *free* T7-monomers,  $T_M$ .  $T_T$  is given by

$$T_T = T_M + 2(T_D + g_{ON}) \quad (43)$$

and its concentration is not affected by dimerization or transcription reactions, so that its dynamics follow the simple ODE

$$\frac{dT_T}{dt} = \hat{\alpha}_T \frac{\lambda^2}{\nu} - \lambda T_T \quad (44)$$

which is equation 28. Using equation 43 to remove  $T_M$  from the ODE for  $T_D$ , we recover equation 29.

## Inhibition of growth by chloramphenicol

What remains to be discussed is how to model the inhibitory effect of chloramphenicol on growth and how this is alleviated in the presence of the resistance. For this, we follow closely the approach taken by Deris *et al.*(8) and we refer to their paper for further details.

Chloramphenicol inhibits translational elongation by direct binding to the 50S subunit of the ribosome. We model this by considering that the ribosomes can be in one of three states.  $R_u$  are active, chloramphenicol-unbound ribosomes which can be engaged in translation.  $R_b$  are ribosomes that have been inhibited by antibiotic binding and  $R_0$  are the naturally-occurring inactive ribosomes that give rise to the Y-offset in the bacterial growth law, eq. 3. We model chloramphenicol inhibition as a reversible binding reaction

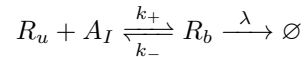

where  $A_I$  is the intracellular chloramphenicol concentration. This leads to the following ODE for the concentration of the bound ribosomal species

$$\frac{dR_b}{dt} = k_+ R_u A_I - k_- R_b - \lambda R_b \quad (45)$$

Reversible chloramphenicol binding happens at a faster timescale than growth and gene expression. Therefore, we assume  $R_b$  to be in quasi-steady state, from which we get

$$R_u = \frac{\left(1 + \frac{\lambda}{k_-}\right) (R - R_0)}{1 + \frac{k_+}{k_-} A_I + \frac{\lambda}{k_-}} \approx \frac{1}{1 + \frac{A_I}{K_D}} (R - R_0) \quad (46)$$

where we have used the fact that  $k_- \gg \lambda$  and we have introduced the total ribosomal concentration  $R = R_u + R_b + R_0$  and the parameter  $K_D = \frac{k_-}{k_+}$ , which relates to the affinity of chloramphenicol to the ribosome. Equation 46 reveals that the presence of chloramphenicol reduces the concentration of actively translating ribosomes by a factor  $\frac{1}{1 + \frac{A_I}{K_D}}$ .

Since we can transform ribosomal concentrations to proteome mass fractions by multiplication with the factor  $\frac{n_R}{\rho_{cell}}$ , the same applies to the corresponding mass fractions

$$\Phi_{R_u} = \frac{1}{1 + \frac{A_I}{K_D}} (\Phi_R - \Phi_{R_0}) \quad (47)$$

In the presence of chloramphenicol, only unbound ribosomes contribute to biomass synthesis, so the first bacterial growth law becomes

$$\lambda = \gamma_0 \Phi_{R_u} = \frac{\gamma_0}{1 + \frac{A_I}{K_D}} (\Phi_R - \Phi_{R_0}) \quad (48)$$

Again, we combine this equation with the second growth law

$$\Phi_P = \frac{\lambda}{\nu}$$

and the finite size of the proteome

$$\Phi_Q + \Phi_R + \Phi_P + \Phi_S = 1$$

to obtain an updated equation for the instantaneous growth rate in the presence of chloramphenicol

$$\lambda = (\Phi_R^{max} - \Phi_{R_0} - \Phi_S(t)) \frac{\nu \gamma_0}{\gamma_0 + \nu \left(1 + \frac{A_I}{K_D}\right)} \quad (49)$$

Finally, we turn to how the intracellular concentration of chloramphenicol,  $A_I$ , can be related to the extracellular concentration,  $A_E$ , which is the one we actually set in experiments. Apart from the reversible binding to the ribosomes, we assume that chloramphenicol enters the cell passively via diffusion and is also degraded catalytically by the action of CAT

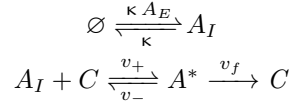

The ODEs that describe the collection of reactions involving chloramphenicol are the following

$$\begin{aligned} \frac{dA_I}{dt} &= \kappa(A_E - A_I) - v_+ A_I C + v_- A^* - k_+ A_I R_u + k_- R_b - \lambda A_I \\ \frac{dA^*}{dt} &= v_+ A_I C - v_- A^* - v_f A^* - \lambda A^* \end{aligned} \quad (50)$$

Assuming that degradation is a fast process, we assume quasi-steady state for  $A^*$ , which leads to

$$A^* = \frac{\frac{v_+}{v_- + v_f}}{1 + \frac{\lambda}{v_- + v_f}} A_I C \approx \frac{A_I C}{K_C} \quad (51)$$

where we have again used the fact that binding and degradation reactions are fast compared to cell growth,  $v_- + v_f \gg \lambda$ , and we have introduced the parameter  $K_C = \frac{v_- + v_f}{v_+}$ , which relates to the affinity of the degradation reaction.

Using this result, together with the quasi-steady state concentration of bound ribosomes from eq. 45, we obtain

$$\begin{aligned}\frac{dA_I}{dt} &= \kappa(A_E - A_I) - \frac{1 + \frac{\lambda}{v_f}}{\hat{K}_C} A_I C - \lambda \frac{A_I R_u}{K_D} - \lambda A_I \\ &\approx \kappa A_E - A_I \left[ \kappa + \frac{C}{\hat{K}_C} + \frac{\rho_{cell}}{n_r \gamma_0 K_D} \lambda^2 + \lambda \right]\end{aligned}\quad (52)$$

where we use the first growth law to replace  $R_u$  with  $\frac{\rho_{cell} \lambda}{n_r \gamma_0}$ , we absorb  $v_f$  into  $\hat{K}_C = \frac{v_- + v_f}{v_+ v_f}$  and for the last approximation we use the fact that  $v_f \gg \lambda$ .

We now examine the value ranges each term in this equation can take, to determine the ones that dominate. For the sources from which we obtain our parameter values, see Supplementary Table 1.

- For the concentrations of chloramphenicol and light intensities used in our experiments, we obtain growth rate values in the range  $\lambda \in [0.015, 0.033] \frac{1}{min}$
- With this, the term with square-dependency on the growth rates takes on values in the interval  $[0.1382, 3] \frac{1}{min}$
- The diffusion rate  $\kappa \approx 90 \frac{1}{min}$  is one to two orders of magnitude larger than the last two terms
- Since  $\hat{K}_C \approx 0.333 nM min$ , the term  $\frac{C}{\hat{K}_C}$  scales as  $3C$ , which can become comparable to  $\kappa$  or dominant for even low concentrations of CAT.

Because of this, we further approximate the ODE for  $A_I$  as

$$\frac{dA_I}{dt} \approx \kappa A_E - \kappa A_I + \frac{C}{\hat{K}_C} A_I \quad (53)$$

which, since  $A_I$  only takes part in fast binding or degradation reactions can be taken to be at quasi-steady state, leading to

$$A_I \approx \frac{A_E}{1 + \frac{C}{\kappa \hat{K}_C}} \quad (54)$$

Inserting equation 54 back into equation 49, we recover the expression for growth rate in our model, eq. 32, except for the exponent  $h_C$ , which we added *a posteriori* because it improved the capability of the model to capture the non-linear response of the photophilic strain in experiments.

## Modeling the dynamics of co-culture composition

We consider an exponentially growing two-strain co-culture in a turbidostat setup. The accumulation of total biomass  $M_T$  in the vial is given by the combined exponential growth of the two strains that are present (in this section,  $p$  and  $c$  subscripts denote the photophilic and constitutive strains respectively):

$$\frac{dM_T}{dt} = \lambda_p M_p + \lambda_c M_c$$

The principle of a turbidostat consists in balancing the biomass increase rate by an equal dilution rate, so that the overall density of the culture is kept constant. To get a formula for this effective rate of dilution,  $d$ , we set

$$\frac{dM_T}{dt} \stackrel{!}{=} d M_T$$

which leads to

$$d = \frac{\lambda_p M_p + \lambda_c M_c}{M_p + M_c} = \lambda_p \varphi_p + \lambda_c \varphi_c$$

where we have defined the strain fractions in the co-culture  $\varphi_p = \frac{M_p}{M_p + M_c}$  and  $\varphi_c = \frac{M_c}{M_p + M_c}$ , with  $\varphi_c + \varphi_p = 1$ .

The differential equation governing the dynamics of the photophilic fraction,  $\varphi_p$  can be derived as follows:

$$\frac{d\varphi_p}{dt} = \frac{d}{dt} \frac{M_p}{M_T} = \frac{1}{M_T} \frac{dM_p}{dt} + M_p \frac{d}{dt} \frac{1}{M_T} = \frac{1}{M_T} \frac{dM_p}{dt} = \frac{\lambda_p M_p - d M_p}{M_T} = (\lambda_p - d) \varphi_p$$

where we have used the fact that in turbidostat mode  $\frac{dM_T}{dt} = 0$ . Inserting the expression for the dilution rate  $d$  from above and noting that  $\varphi_c = 1 - \varphi_p$  we get the following ODE for  $\varphi_p$ :

$$\frac{d\varphi_p}{dt} = (\lambda_p - \lambda_c) (1 - \varphi_p) \varphi_p \quad (55)$$

The equation provides immediate intuition about the co-culture dynamics, with three qualitatively different scenarios which are schematically shown in Figure 5a of the main text. Dynamic equilibria arise when the derivative in equation 55 vanishes. This happens for  $\varphi_p = 1$  and  $\varphi_p = 0$ , corresponding to the extinction of either the constitutive or the photophilic strain.

The stability of the fixed points is determined by the sign of  $\frac{d\varphi_p}{dt}$  close to the fixed point. Since  $0 \leq \varphi_p$  and  $0 \leq 1 - \varphi_p$ , the sign of the derivative is completely determined by the sign of the first factor. If  $\lambda_c > \lambda_p$ , the fixed point at  $\varphi_p = 1$  becomes unstable and the co-culture evolves towards  $\varphi_p = 0$ , a culture dominated by the constitutive strain. Alternatively, if  $\lambda_p > \lambda_c$ , the fixed point at  $\varphi_p = 0$  becomes unstable and the photophilic strain will inevitably come to dominate. In both of these cases, the magnitude of the difference in growth rates sets how fast the system converges to the stable equilibrium.

When both strains grow at the same pace ( $\lambda_c = \lambda_p$ ), the derivative vanishes irrespective of the value of  $\varphi_p$ . This means that the co-culture will maintain any particular ratio that it has when  $\lambda_c$  and  $\lambda_p$  first become equal.

In view of this, the control strategy for stabilizing the strain ratio with optogenetic feedback becomes clear. If the ratio is lower than the desired value, light levels that result in the photophilic strain growing faster than the constitutive one should be applied, steering the system towards  $\varphi = 1$ . The opposite is true if the ratio is higher than the desired value. Then, once the desired setpoint is reached, the light level should be such as to precisely ensure that the growth rates are equal, so that the desired ratio is maintained over time.

The analysis also reveals the fragility of the co-existence equilibrium. Even small fluctuations in the growth rate will cause the system to evolve towards a monoculture.

For our simulations,  $\lambda_c$  is assumed to be constant. On the contrary,  $\lambda_p$  is calculated at any given time by solving the set of equations 29-32 for the current external light input  $L$ , in order to compute the instantaneous growth rate of the photophilic strain via equation 32.

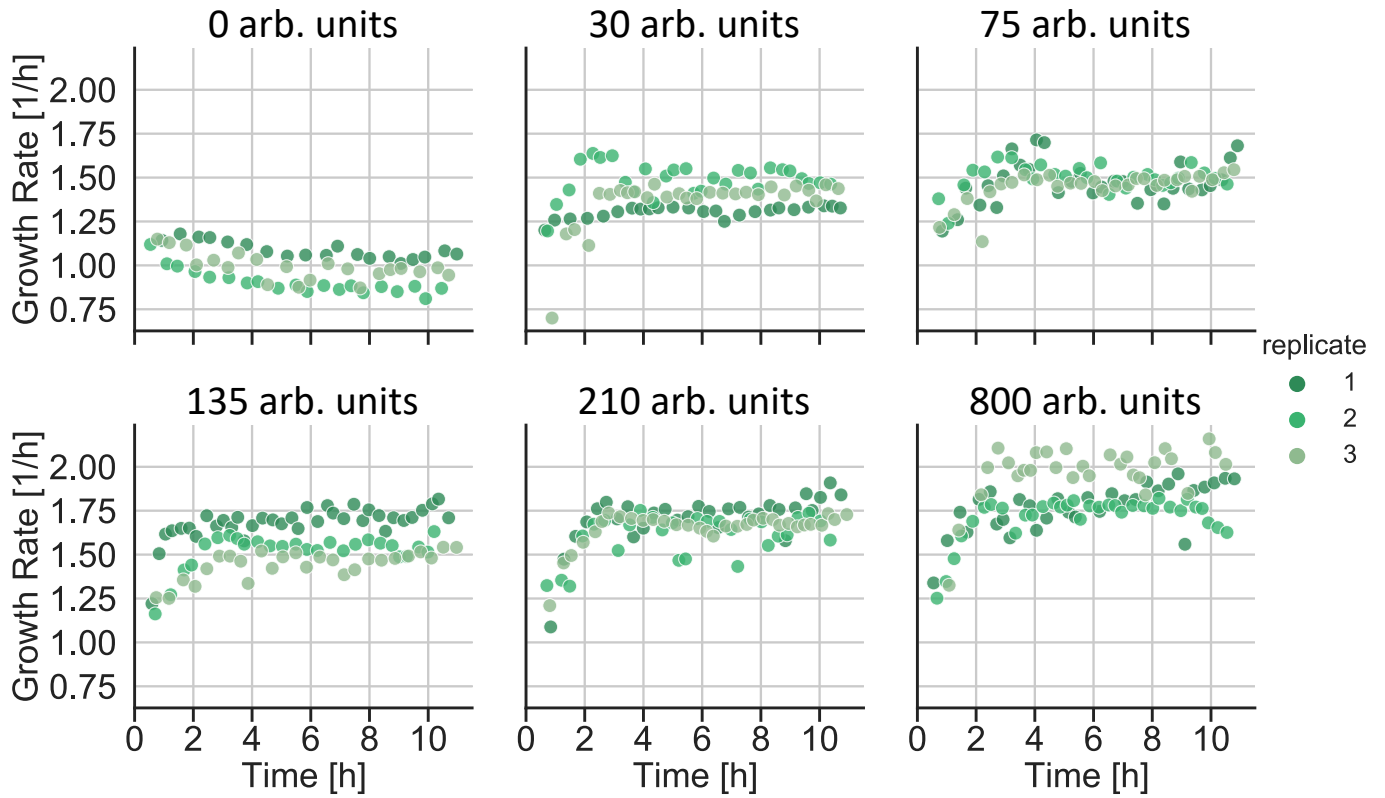

**Supplementary Fig. 1. Dose-response of photophilic strain.**

This figure depicts the raw data for determination of the steady-state growth rate of the photophilic strain in response to light (Figure 2b). For different light intensities, each run corresponds to a biological replicate carried out on a different day. The steady-state growth rates depicted in Figure 2b correspond to the median of each replicate over time in the time interval 6h;10h. Source data are provided as a Source Data file.

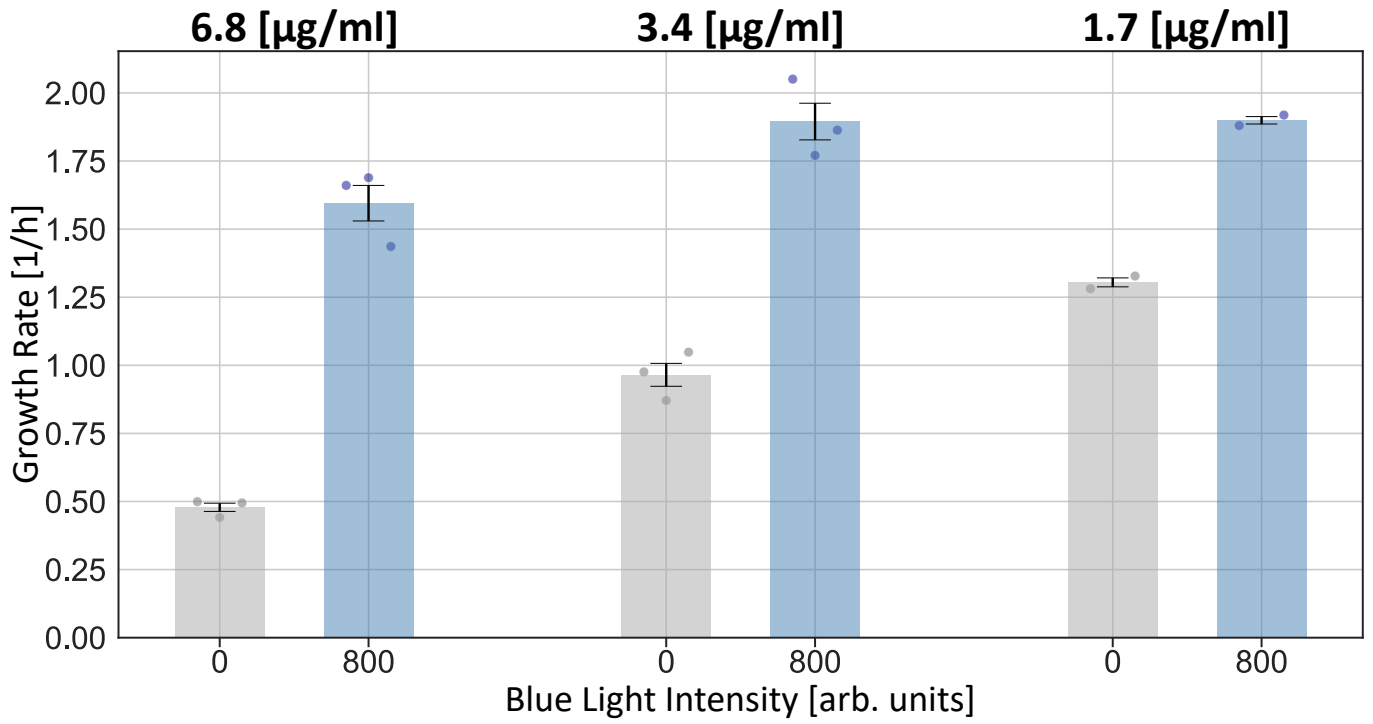

**Supplementary Fig. 2. Growth of photophilic strain with different external concentrations of chloramphenicol**

The growth rate of the photophilic strain can be modulated by changing the light intensity or the external concentration of chloramphenicol. Different bars correspond to equilibrium growth rate of the photophilic strain in the presence of different chloramphenicol concentrations and either no light or the maximal intensity used in this study (Data are presented as mean values +/- SEM, n=3 biologically independent samples for 6.8 and 3.4 [ug/ml] and n=2 biologically independent samples for 1.7 [ug/ml]). For the rest of the study, we used 3.4 ug/ml as fixed chloramphenicol concentration, because it leads to a good fold-change in growth, while maintaining a saturated growth rate when the resistance is fully induced. We hypothesized that this would reduce the selection pressure during closed-loop co-culture experiments for mutations that escape the growth control circuit. Source data are provided as a Source Data file.

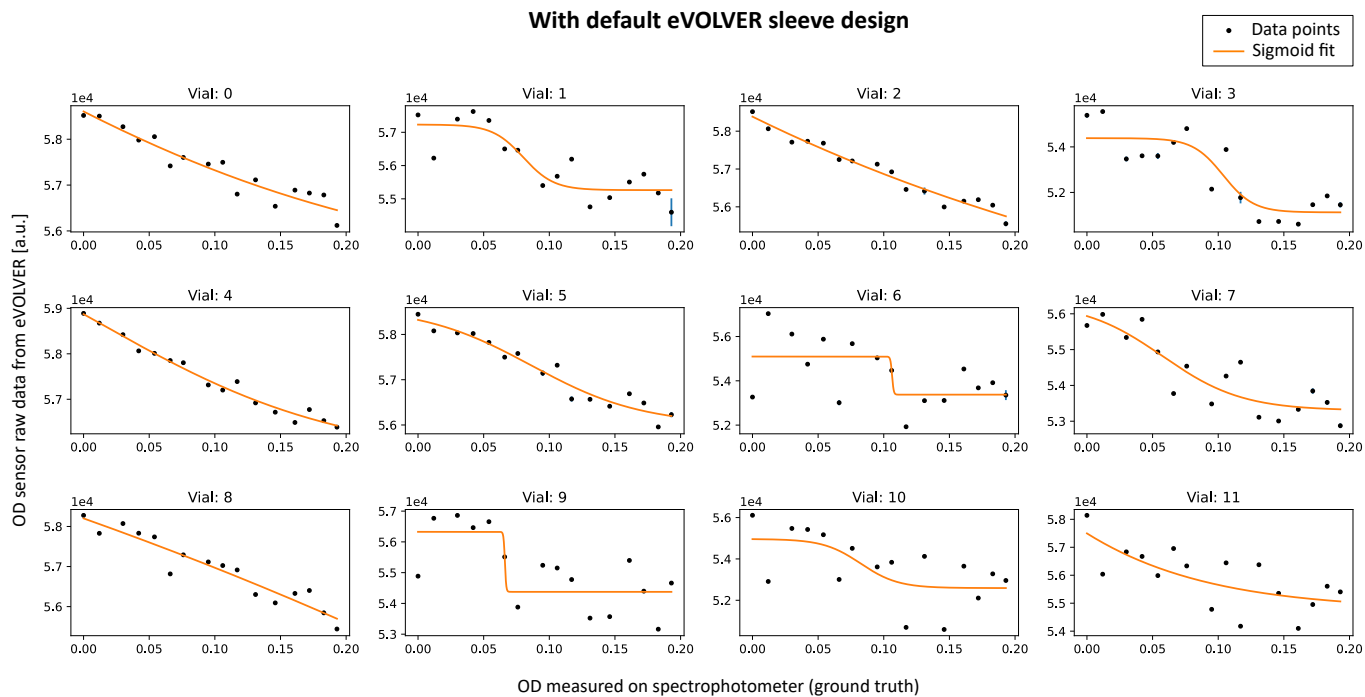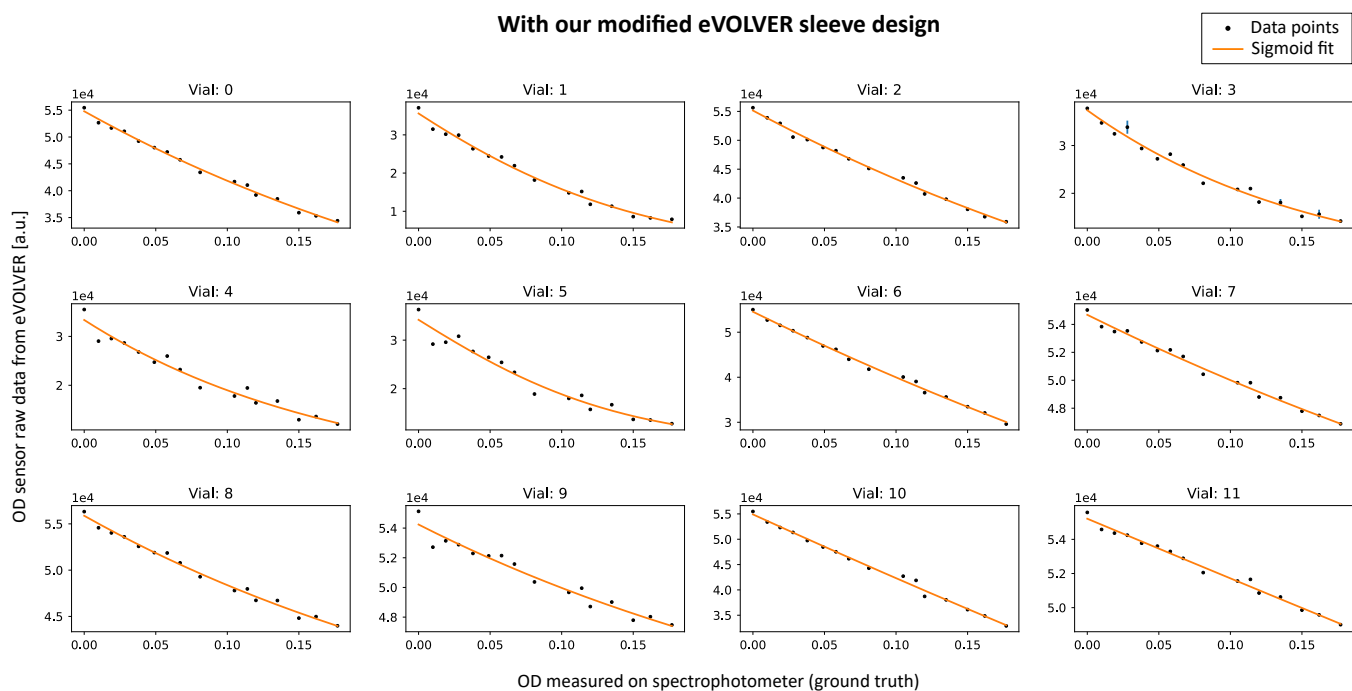

**Supplementary Fig. 3. Improved OD measurement with modified eVOLVER sleeve design**

As shown in Figure 3a (Left), we re-designed the glass vial cap and the tube-holder with added O-rings to prevent wobbling of the culture vial inside the eVOLVER sleeve. This resulted in very stable and consistent OD sensor measurements compared to that with the default eVOLVER sleeve. These plots show the results of the calibration procedure of the OD-sensors in different eVOLVER sleeves, performed with the same calibration standards on the same day. The OD calibration was carried out once and the saved calibration file used for all experiments in this study. The plots were generated automatically by the eVOLVER and source data can be provided upon reasonable request.



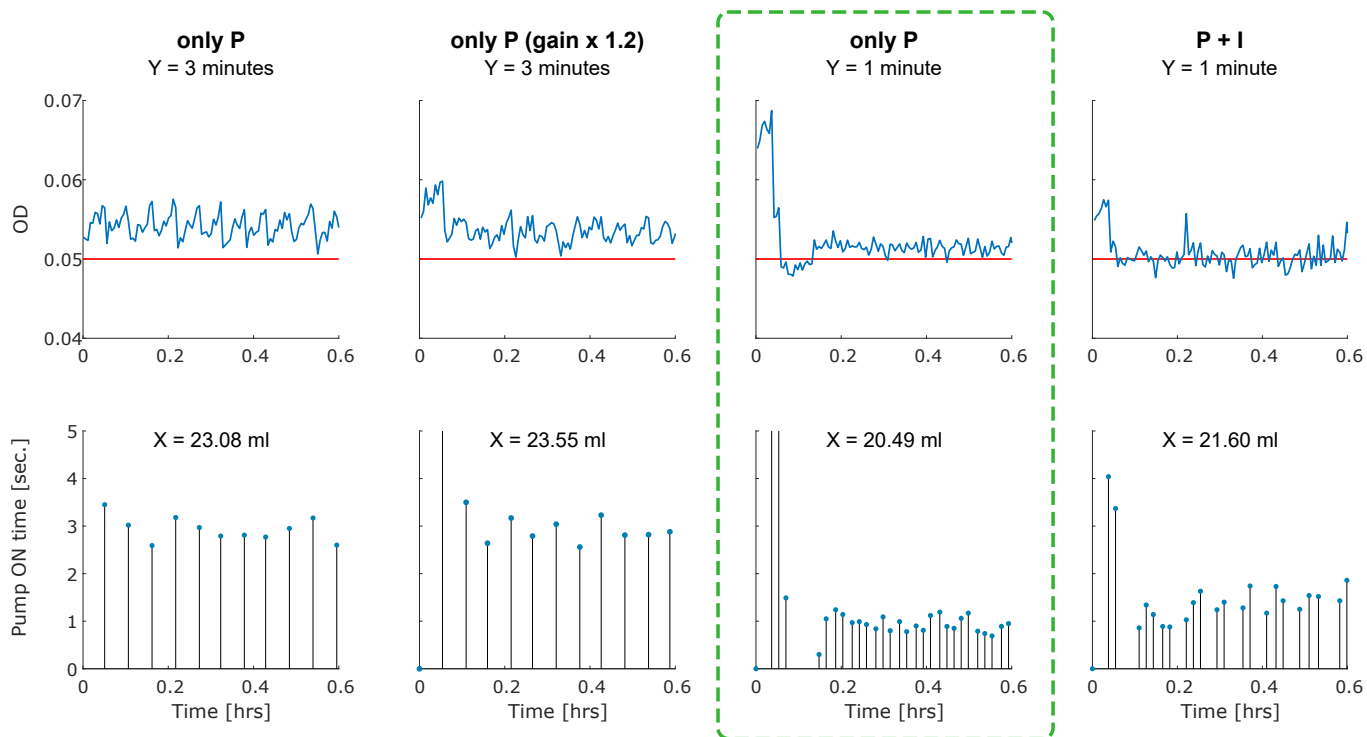

**Y** = Minimum time between two pump events (min.), **X** = Media consumed in 30 minutes (ml)

**P** = Proportional controller, **I** = Integral controller, **gain** =  $\frac{\text{culture volume}}{\text{pump flow rate}}$

— OD set-point

#### Supplementary Fig. 4. OD regulation controller parameter tuning.

We used the modified eVOLVER platform in turbidostat mode in order to maintain the cell culture density in a desired range in our experiments. This mode has an OD regulation feedback controller continuously running in the background. Based on OD measurements, this controller determines the duration for which the media pump should be switched ON in order to dilute the culture to a desired density. We performed multiple trial experiments with different OD regulation controller parameters. In all of our experiments in this study, we chose the controller parameters which exhibited better OD set-point tracking with less media consumption (highlighted with green dashed line box in this figure). Source data are provided as a Source Data file.

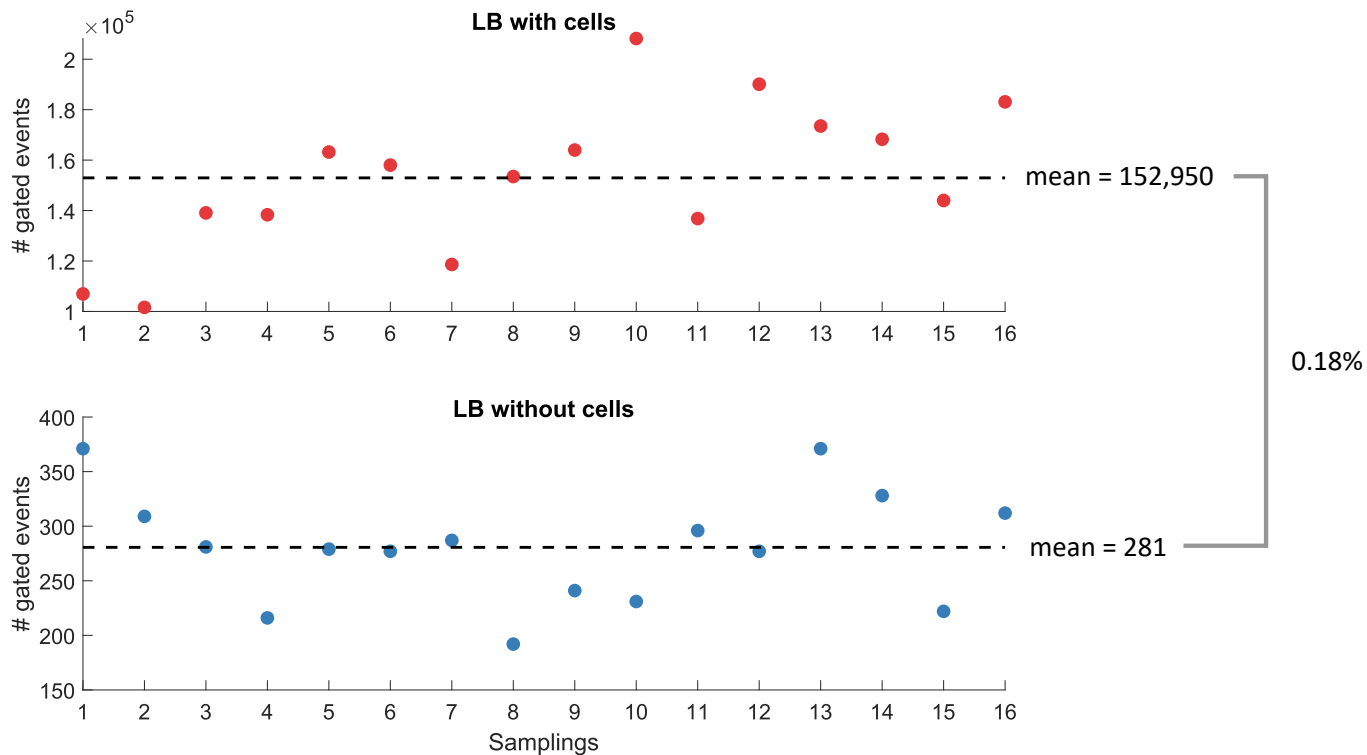

**Supplementary Fig. 5. Sampling with *evotron* platform exhibits negligible cross-contamination**

This figure shows the measured flow-cytometry gated events (indicating cell counts) in multiple automated samplings, with our *evotron* sampler, from two parallel cultures. One culture contained *E. coli* cells in LB media while the other contained sterile LB media without cells. Samples from these two cultures were taken in an alternate fashion with automated cleaning steps between successive sampling attempts. The number of gated events measured from the LB culture samples without cells displayed only background events with no increasing trend, even after multiple alternate sampling of LB culture with cells. Moreover, overnight incubation of the vial without cells after the 16th sampling cycle resulted in no bacterial growth, indicating that there had been no cross-contamination. Source data are provided as a Source Data file.

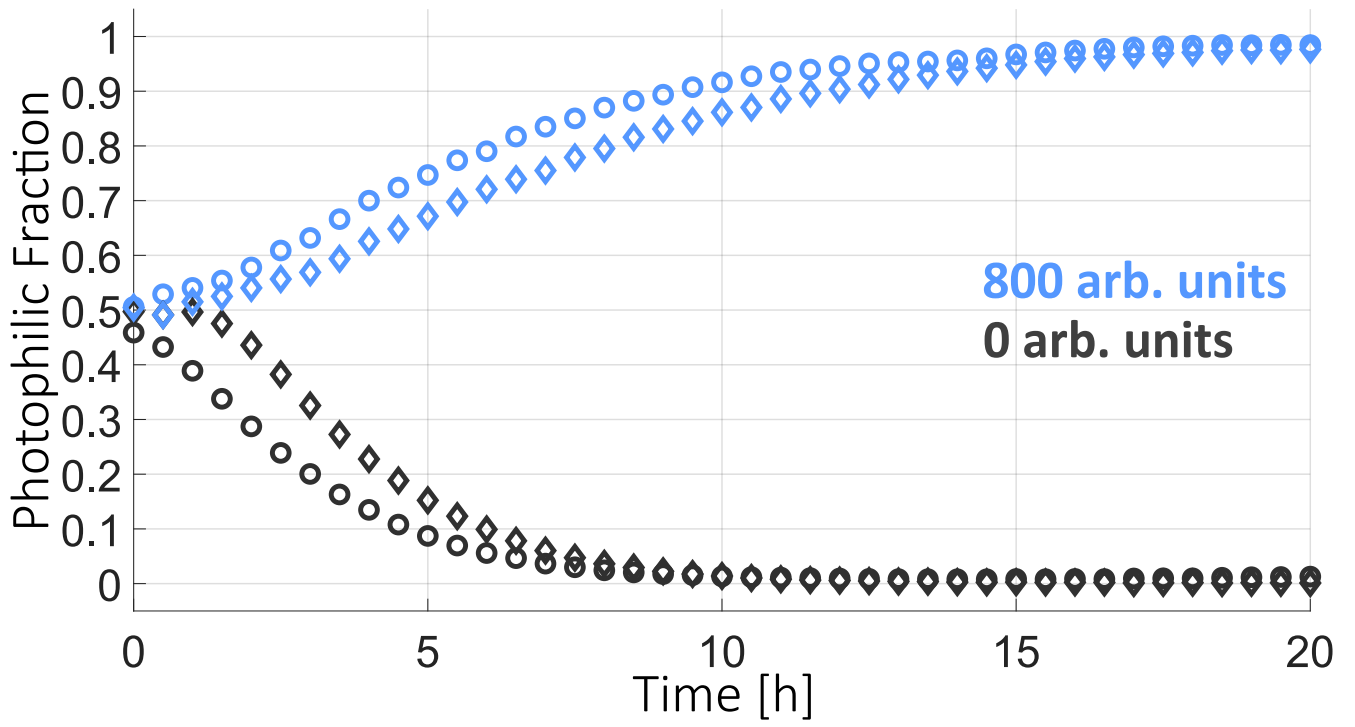

**Supplementary Fig. 6. Open-loop co-culture: replicates**

Biological replicates of the open-loop co-cultures with maximal light exposure or no light exposure shown in Figure 5b. Different symbols correspond to experiments carried out on different days. Source data are provided as a Source Data file.

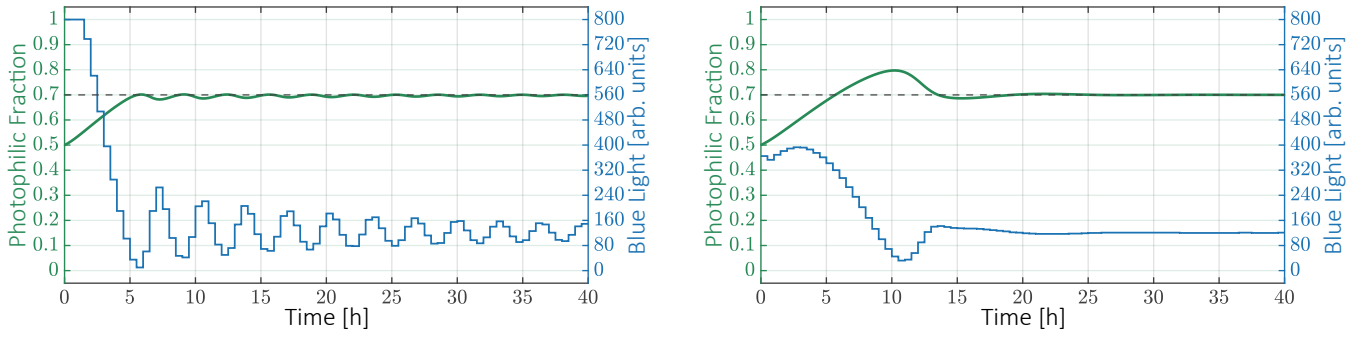

**Supplementary Fig. 7. Different sets of optimal PID gains**

The computational optimization procedure makes it possible to select gains that optimize different aspects of the dynamic behavior of the closed-loop system. **(Left)** The gains used in the closed-loop experiments produce a fast transient at the cost of low-amplitude oscillations at steady-state ( $K_p = 5.9055 \cdot 10^3$ ,  $K_i = 3.0382$ ,  $K_d = 2.3427 \cdot 10^5$ ,  $K_{bc} = 0.01 \cdot K_i$ ). **(Right)** An alternative set of gains results in no steady-state oscillations but after a longer transient phase with a large overshoot ( $K_p = 1.5327 \cdot 10^3$ ,  $K_i = 9.6743$ ,  $K_d = 9.5689 \cdot 10^4$ ,  $K_{bc} = 0.01 \cdot K_i$ ).

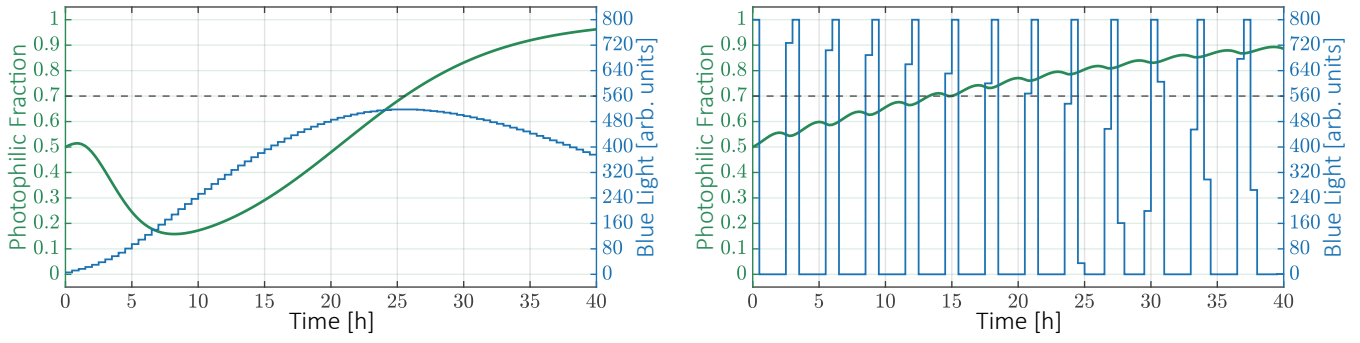

**Supplementary Fig. 8. Un-optimized PID gains lead to poor dynamic performance of the closed-loop system**

An arbitrary choice of gains lead to poor dynamic performance. Since the space of possible values for the gains is large, it is impractical to find a suitable set of gains through experimental trial-and-error. Model-guided optimization procedures can vastly reduce the number of experiments required to achieve optimal performance. **(Left)**  $K_p = 1$ ,  $K_i = 1$ ,  $K_d = 1$ ,  $K_{bc} = 1 \cdot K_i$ . **(Right)**  $K_p = 1 \cdot 10^5$ ,  $K_i = 1$ ,  $K_d = 1$ ,  $K_{bc} = 1 \cdot K_i$ .

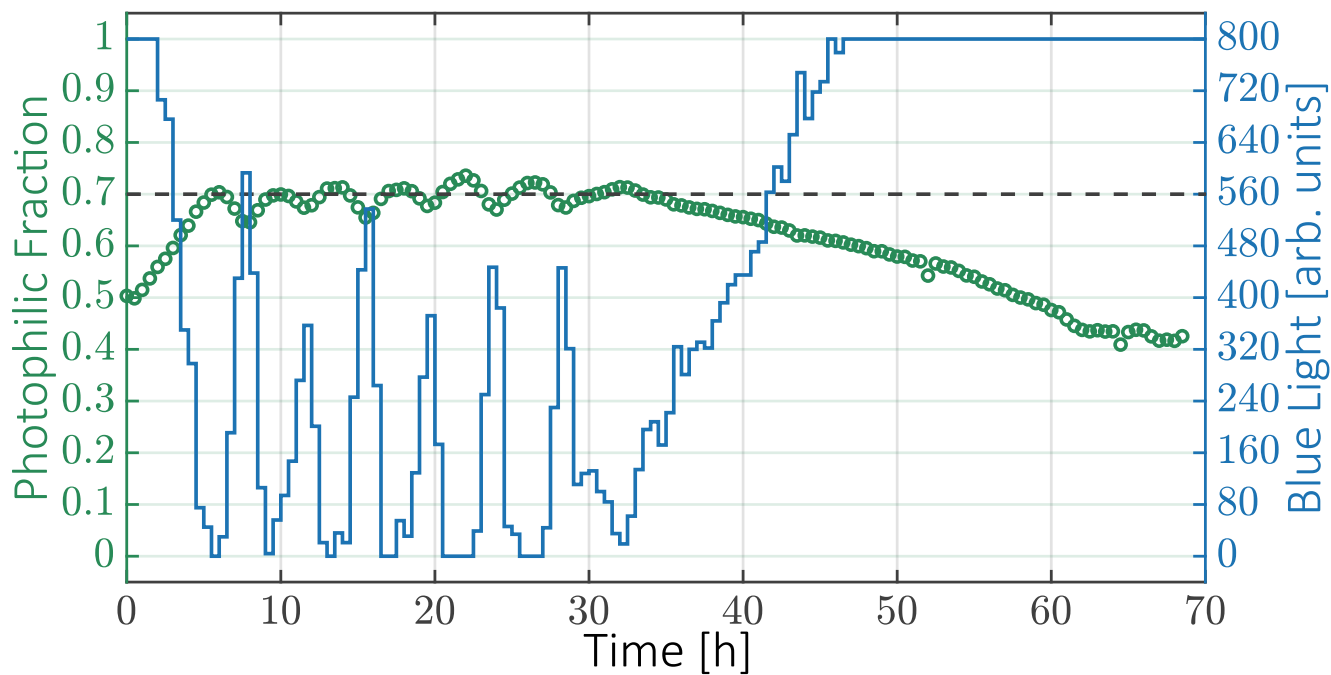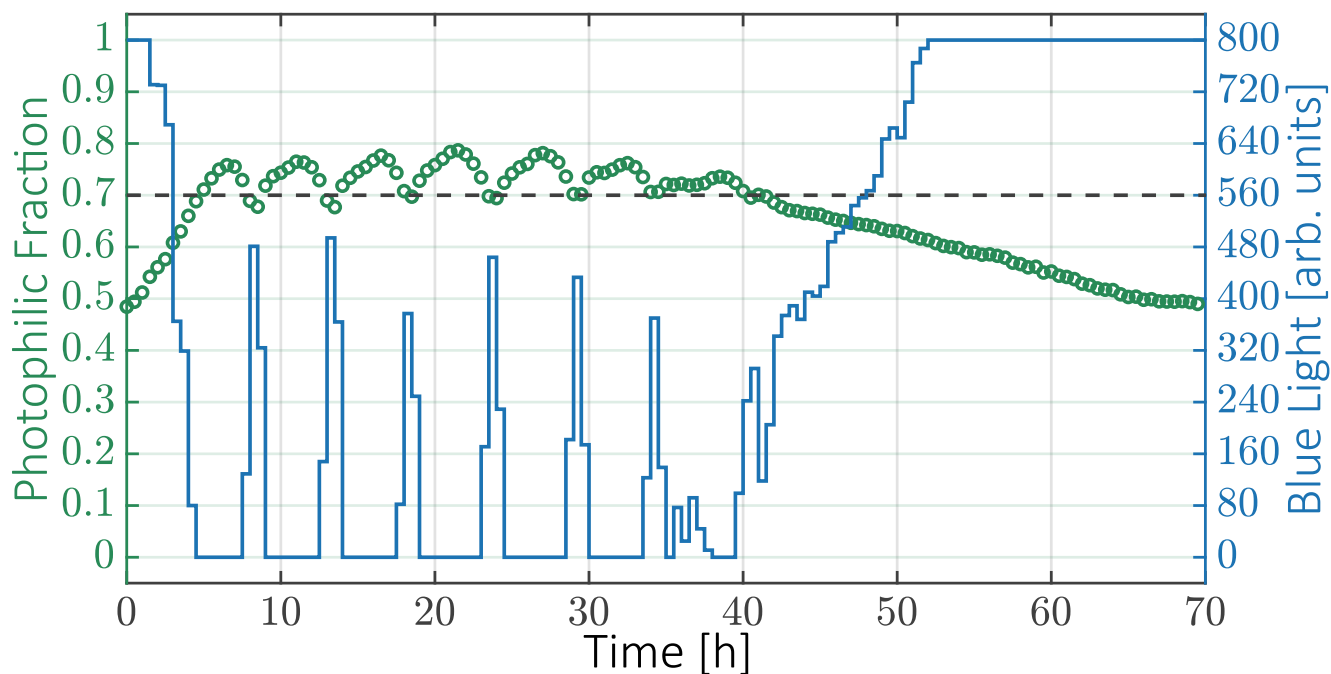

**Supplementary Fig. 9. High-setpoint: replicates**

Biological replicates of the high-setpoint closed-loop co-culture shown in Figure 6c. Source data are provided as a Source Data file.

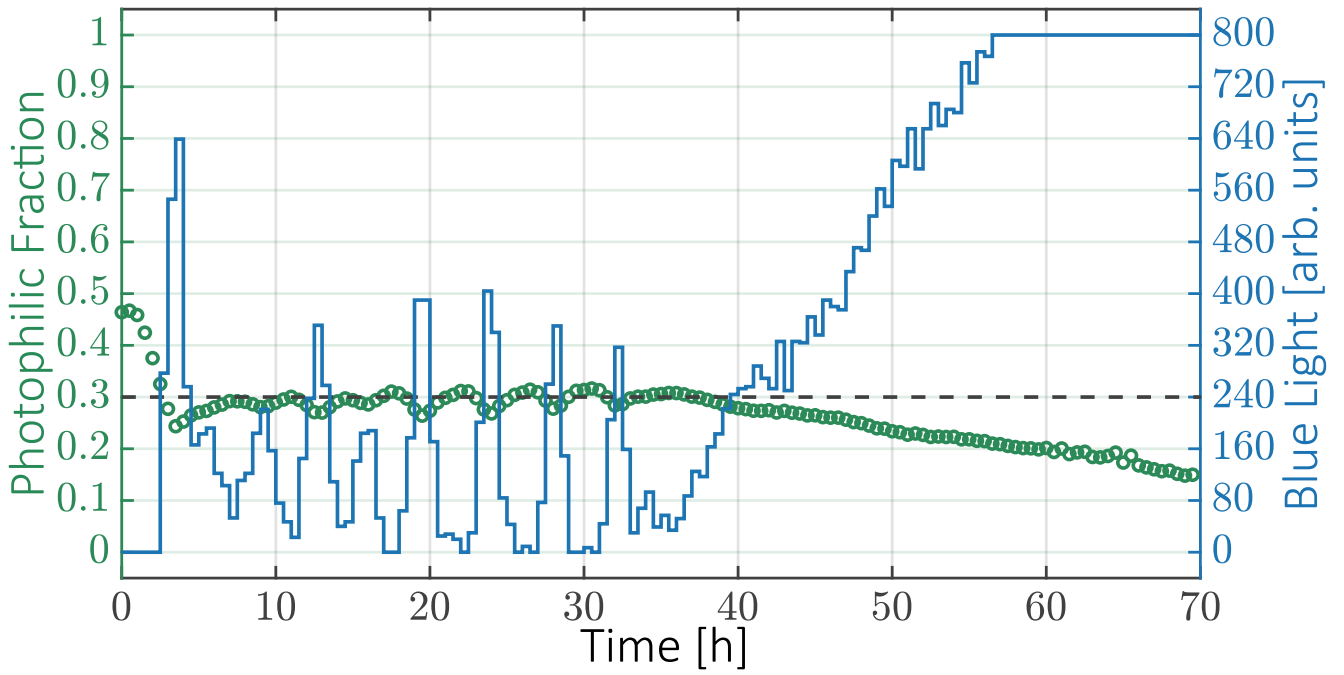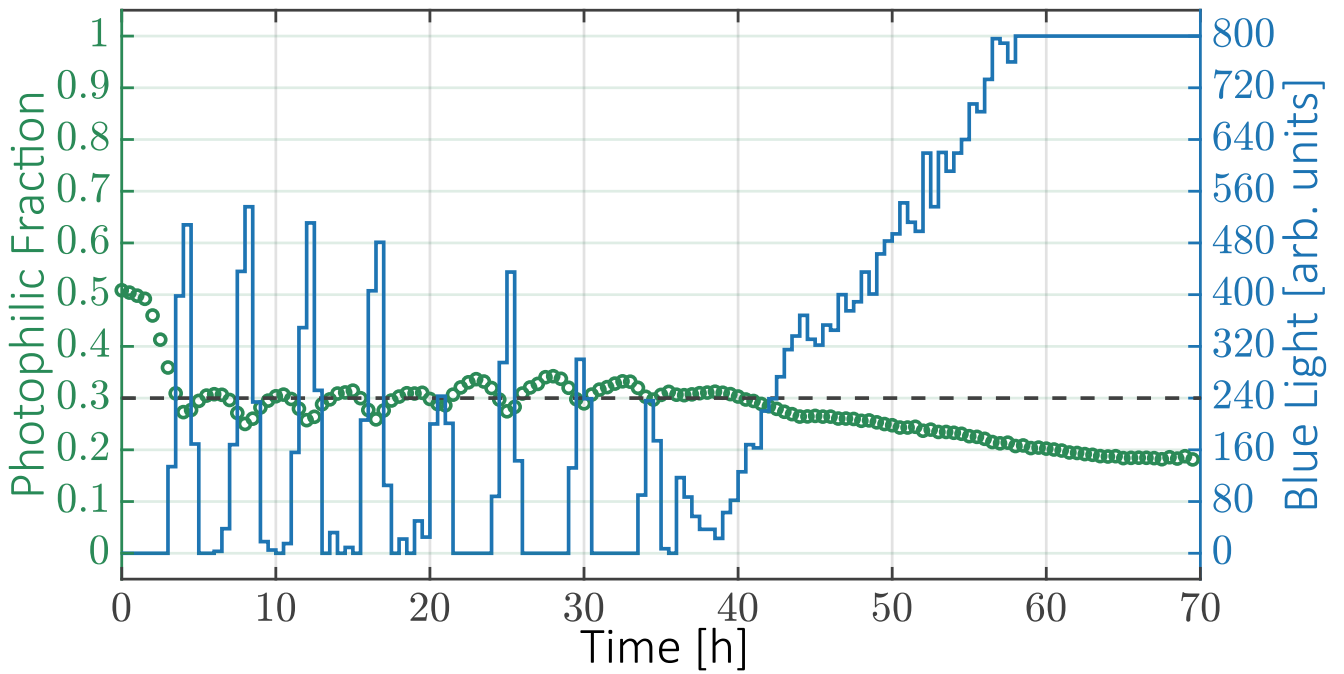

**Supplementary Fig. 10. Low-setpoint: replicates**

Biological replicates of the low-setpoint closed-loop co-culture shown in Figure 6d. Source data are provided as a Source Data file.

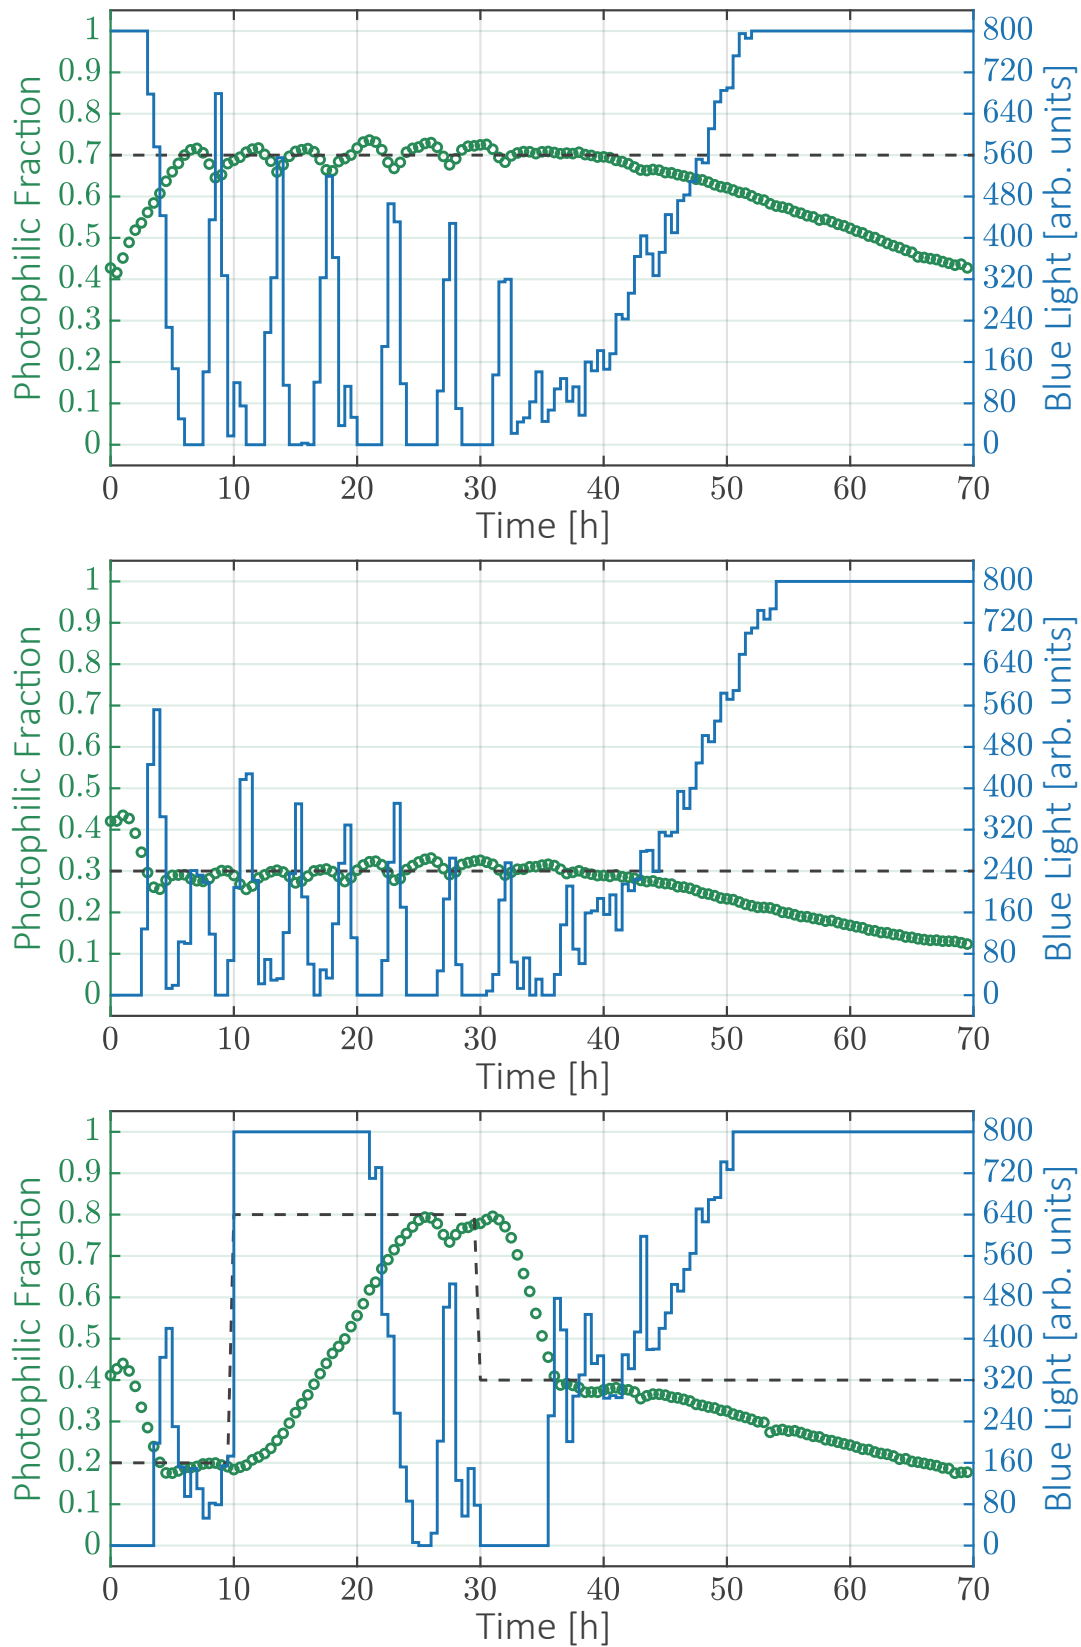

**Supplementary Fig. 11. Breakdown of stabilization after 40h**

After 40h we observe a continuous drift of the co-culture strain ratio in favor of the constitutive strain, probably reflecting the fixation of escape mutations in one of the strains or in both. The drift cannot be fully counteracted by the action of the controller, because change in growth rates due to mutations takes the closed-loop system out of the controllable regime. However, it can also be seen that the drift is much slower than what is observed in the absence of regulation (Figure 5), so that even 30h after the onset of the drift phase, the two strains still co-exist. We hypothesize that this is due to the fact that favorable mutations lead both strains to grow at the fastest attainable rate, which will be similar in both cases due to the low metabolic burden imposed by the growth control circuit in the photophilic strain. Source data are provided as a Source Data file.



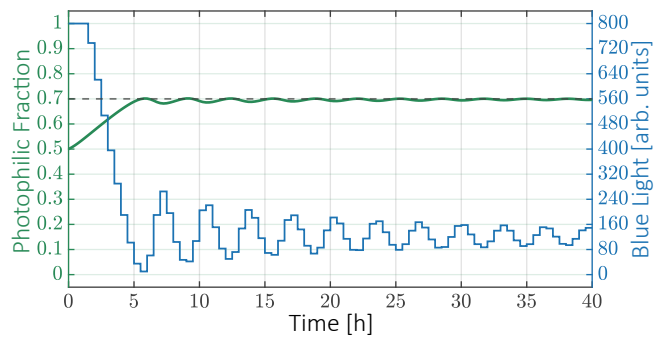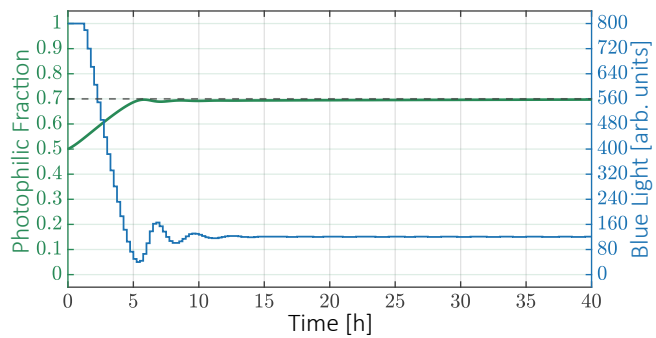

**Supplementary Fig. 12. Sampling frequency and stability**

The mathematical model suggests that the low-amplitude oscillations at steady-state observed in our closed-loop experiments (Figure 6) could be avoided if the sampling frequency is increased. **(Left)** Sampling every 30 minutes. **(Right)** Sampling every 15 minutes.

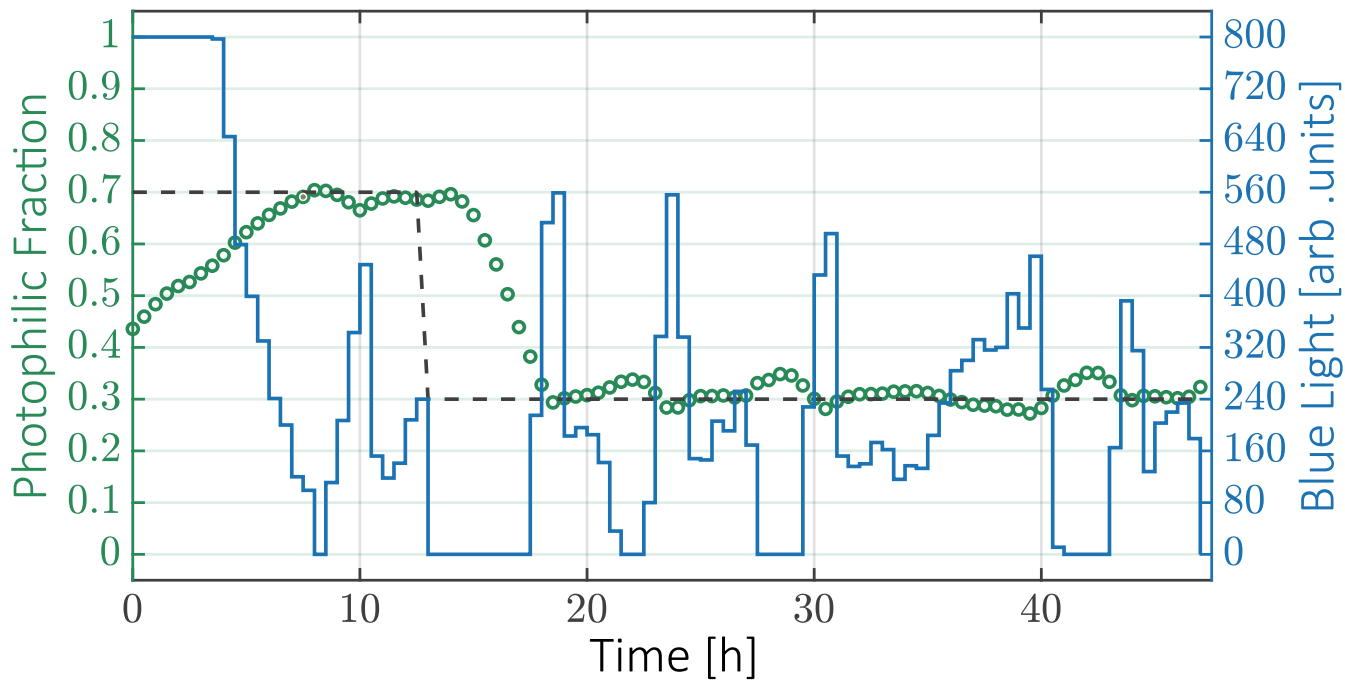

**Supplementary Fig. 13. Setpoint tracking**

As shown in Figure 6, the closed-loop co-culture can be forced to track a dynamically changing setpoint. In this case, the objective was to set the strain ratio to 0.7 during the first 13h and then to change it to 0.3 for the remainder of the experiment. Source data are provided as a Source Data file.

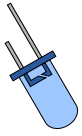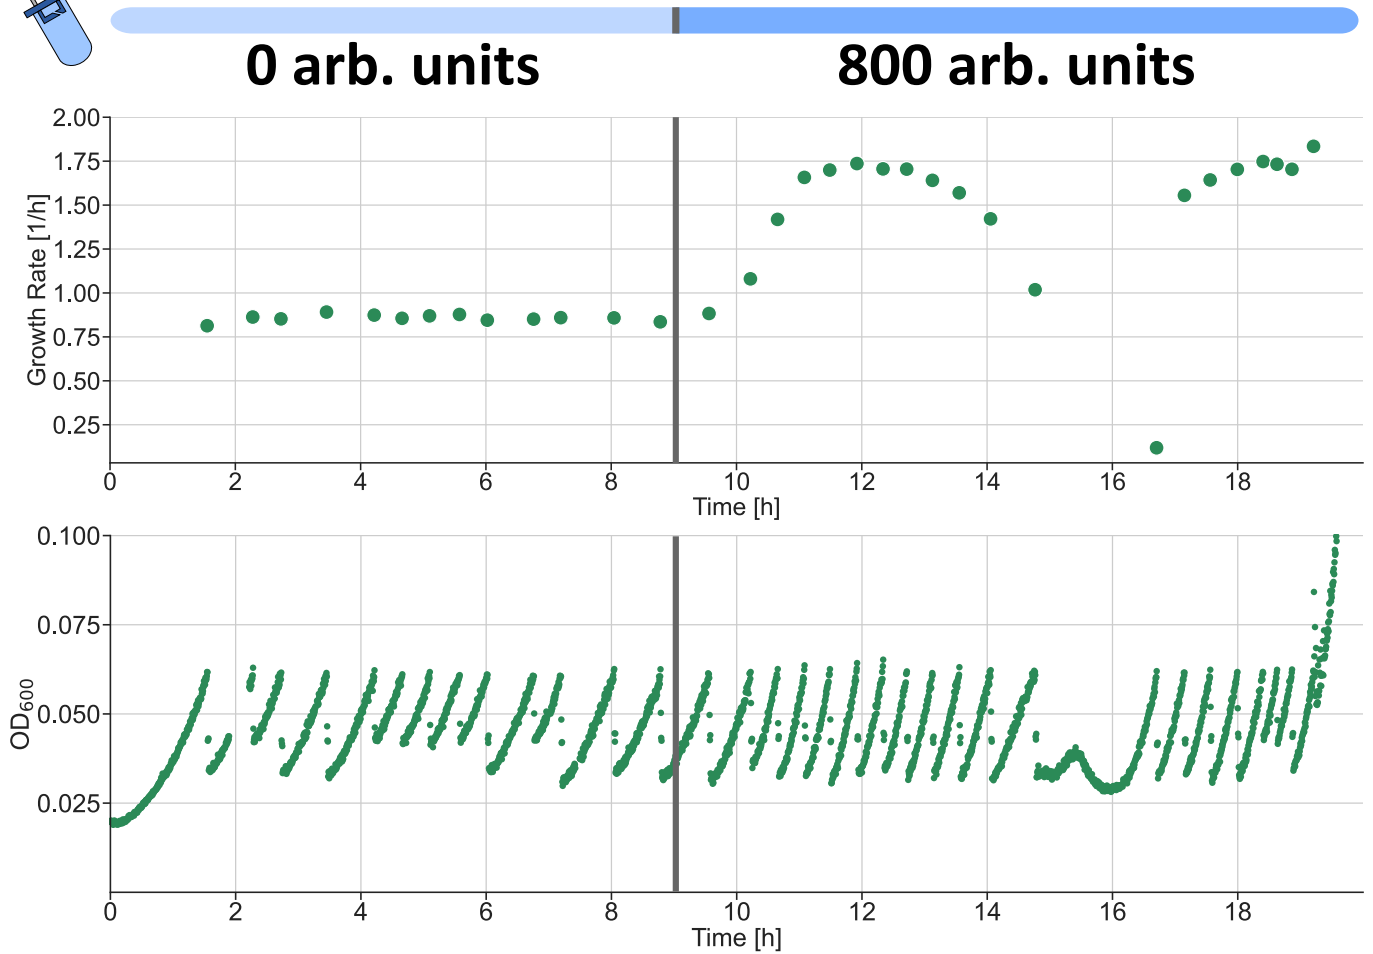

**Supplementary Fig. 14. Growth arrest on *evotron* platform**

After the *evotron* platform was assembled, we began observing a spontaneous, reversible growth arrest in the turbidostat cultures happening after 10-15h. The growth arrest happened at earlier times when the cells were grown with maximal light from the beginning, suggesting that the metabolic state of the cells influenced the timing of the arrest. Since this platform consists of a closed opentrons OT-2 robot (tightly covered with black foil to avoid ambient light inside) with a modified eVOLVER platform replacing its deck (Supplementary Figure 23), we hypothesize that this growth arrest was caused by insufficient aeration within the covered OT-2 enclosure. Addition of an external source of pressurized air into the chamber restored normal growth (Supplementary Figure 15) and the growth defect was never observed when the air supply was running. Source data are provided as a Source Data file.

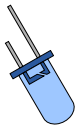

0 arb. units

800 arb. units

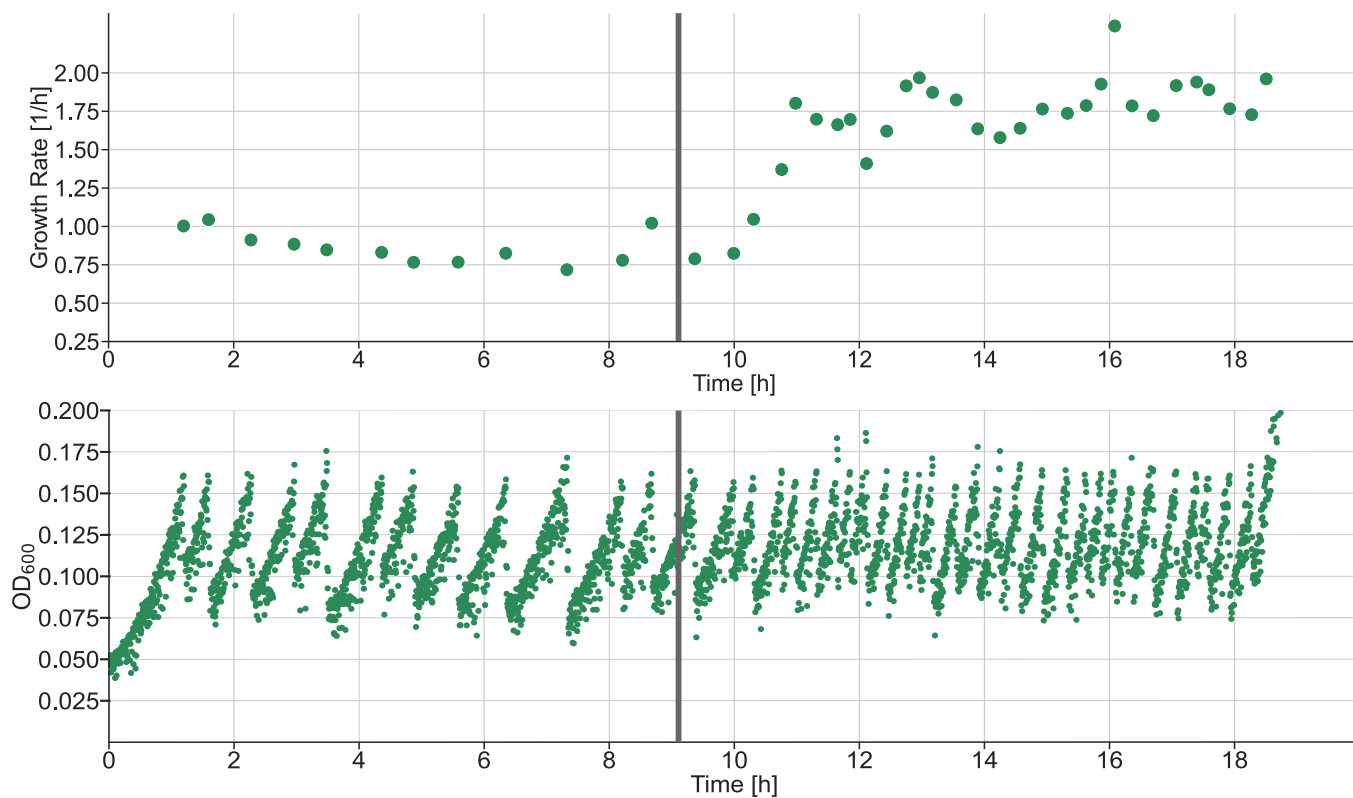

**Supplementary Fig. 15. Aeration restores normal growth on *evotron* platform**

Addition of an external source of pressurized air (4 bar) into the covered OT-2 enclosure restored normal growth in the turbidostat cultures. The data in this figure corresponds to an experiment analogous to the one shown in Supplementary Figure 14, but where the external supply of air was active throughout the experiment. The OD tolerance range of the turbidostat is different between the two experiments, but we observed that this was not the cause of the growth arrest. Source data are provided as a Source Data file.

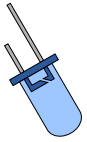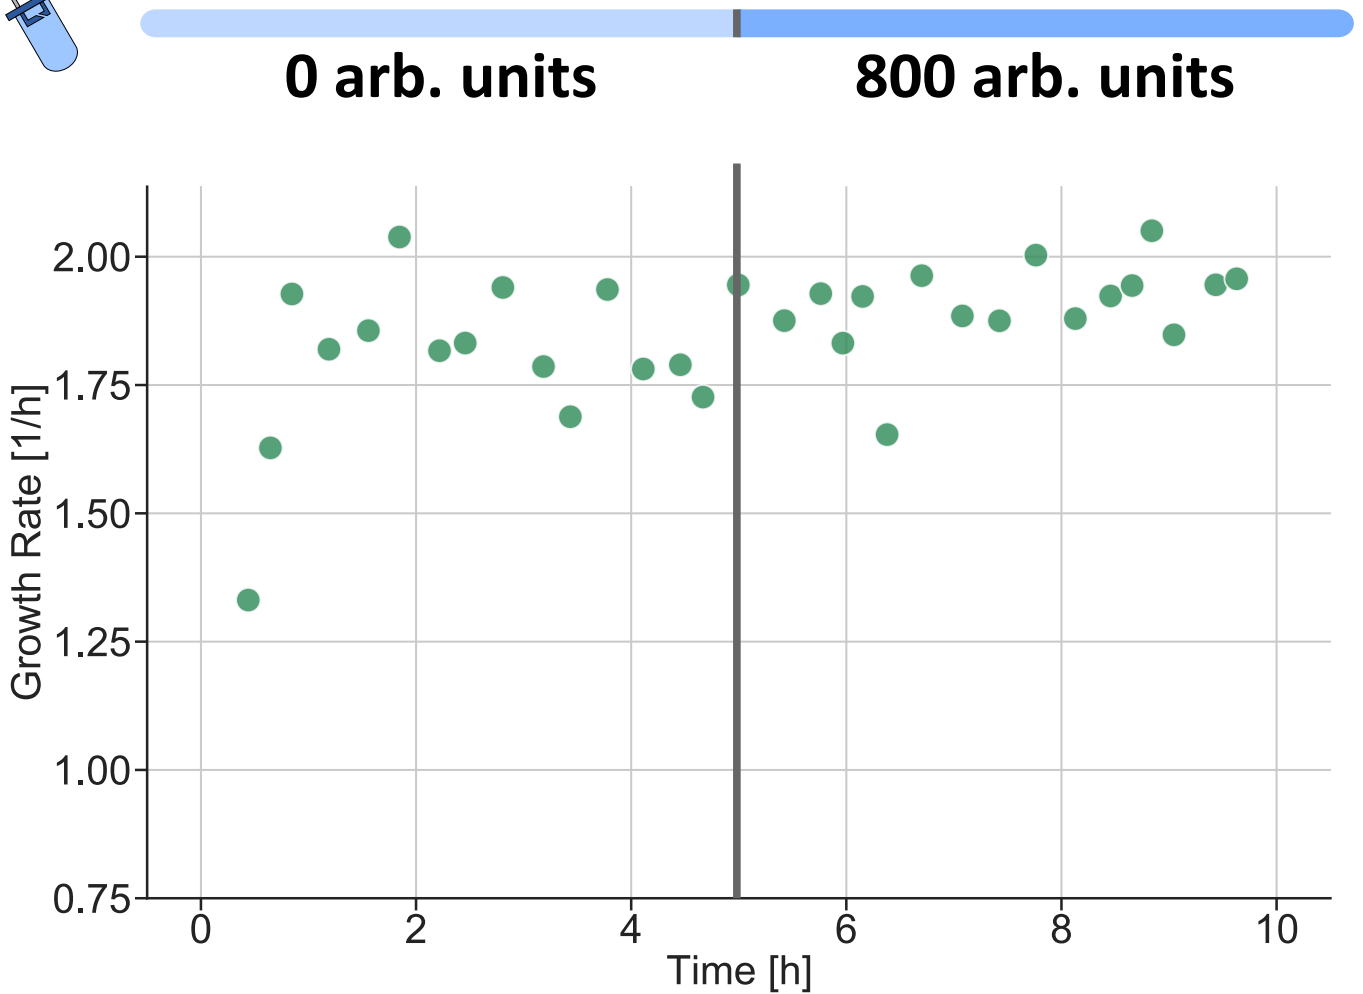

**Supplementary Fig. 16. Growth of photophilic strain is not affected by light in the absence of chloramphenicol**  
The photophilic strain was grown in the absence of chloramphenicol and the culture was grown in the dark for 5h and then illuminated with maximum light intensity. Light does not cause any appreciable difference in the growth rate, suggesting that the induction of the resistance causes negligible metabolic burden and that there is no direct phototoxicity. Source data are provided as a Source Data file.

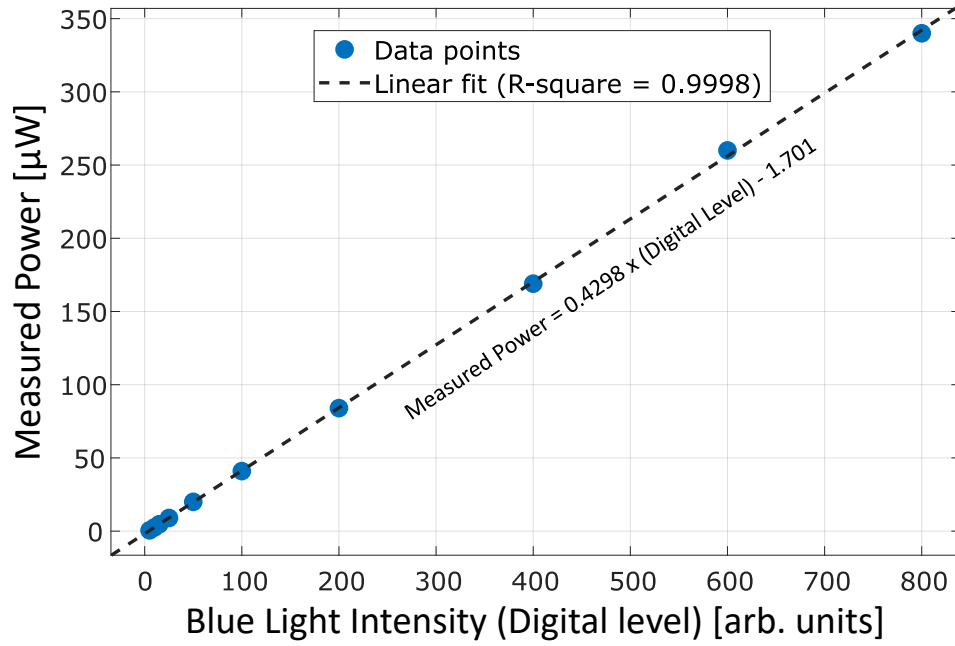

**Supplementary Fig. 17. LED Measured power vs Digital level**

We measured the blue LED (465nm) power inside the eVOLVER sleeve at different digital levels for characterization. Data shows a linear relation between the measured power and the applied digital level. LED power was measured with Nova power meter (PD300 sensor), Ophir Optronics Solutions Ltd. Source data are provided as a Source Data file.

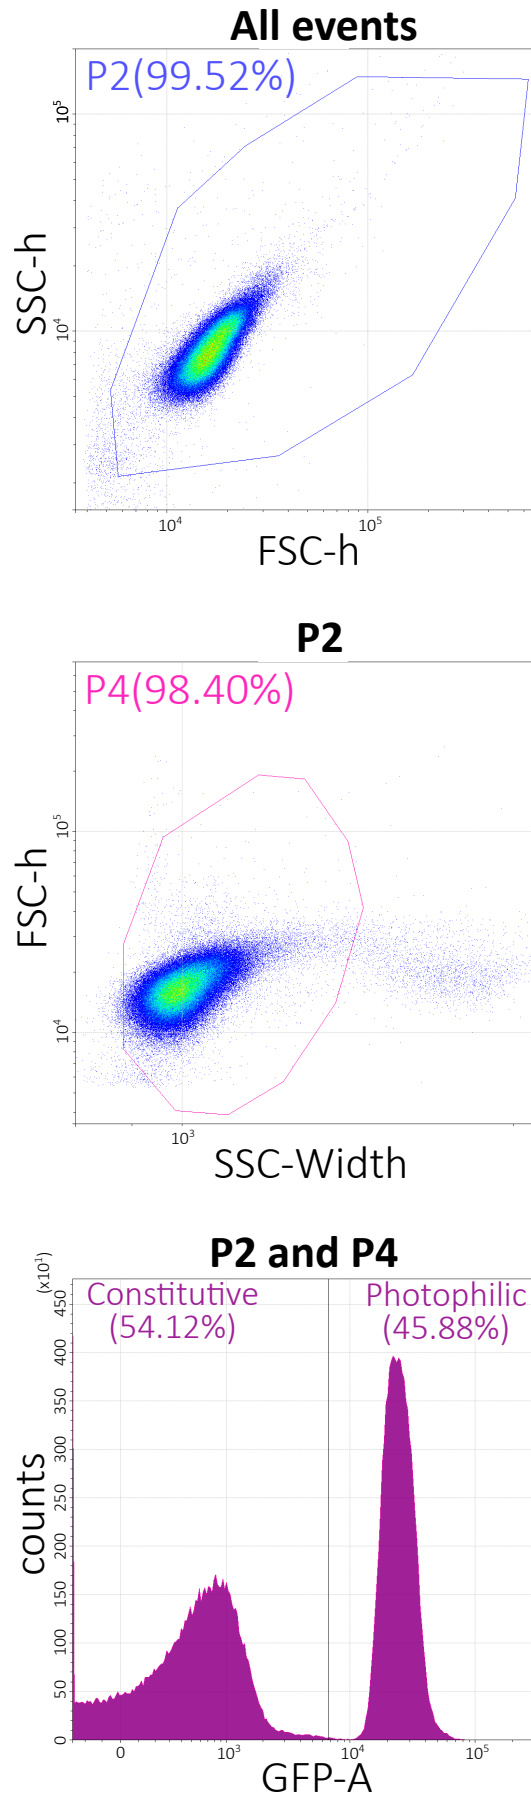

**Supplementary Fig. 18. Flow-cytometry gating strategy**

Gating strategy used to distinguish photophilic and constitutive cells and determine the co-culture strain ratio. First a polygon gate was applied on the FCS-H vs. SSC-H channels to select for living cells (P2). P2 was then further gated in the SSC-Width vs. FSC-H channels to select for single cells (P4). In co-culture experiments, the P4 population was further separated into two subpopulations (corresponding to the photophilic and constitutive strains) by applying a fixed threshold gate on the GFP-A channel (Threshold=6500).

**a****LED integration**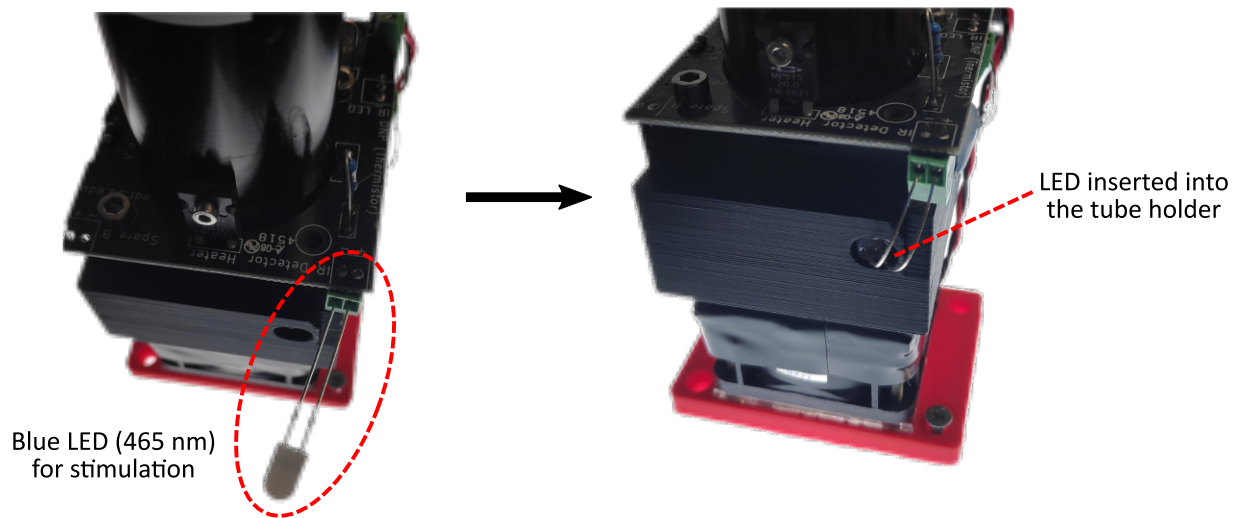**b****eVOLVER motherboard****M6 plugin**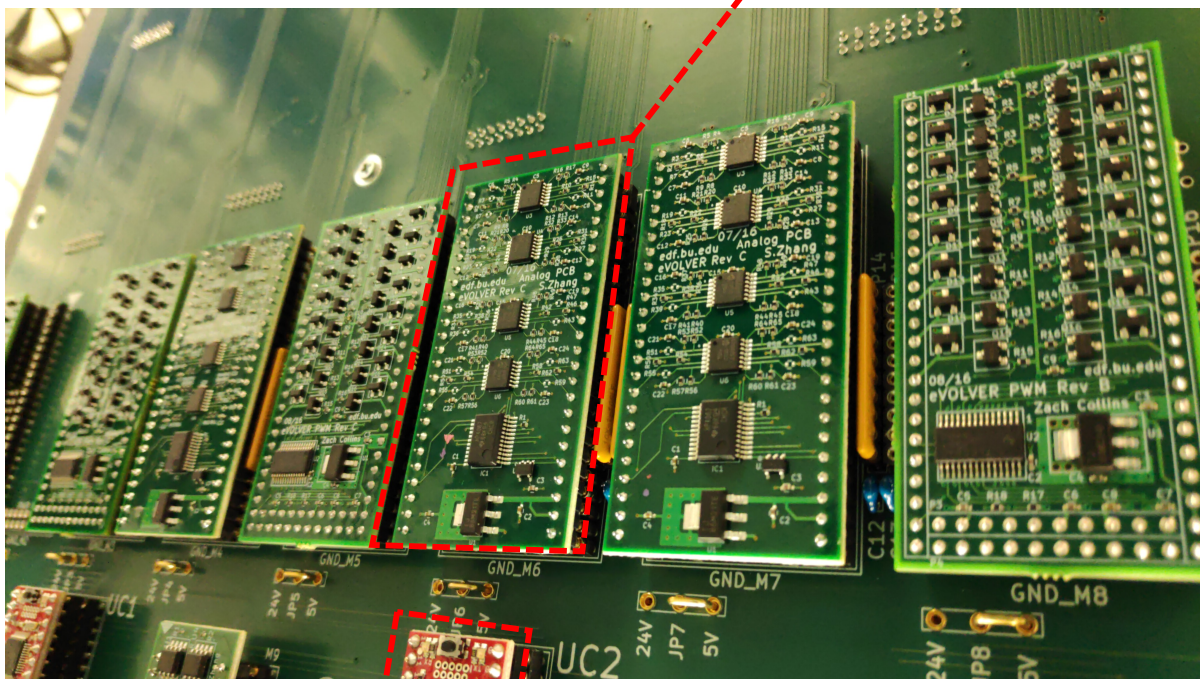**UC2 Arduino  
(SAMD21)**

**Supplementary Fig. 19. LED integration on the modified eVOLVER sleeve.**

(a) LED for cell culture stimulation is connected to the sleeve electronic board at the 90 degree photodiode (IR detector) location. (b) To control and power this additional LED, M6 plugin on the eVOLVER motherboard is replaced with eVOLVER PWM board (1). UC2 SAMD21 arduino is re-programmed with suitable code accordingly, providing software control access for changing LED intensity during optogenetic experiments.



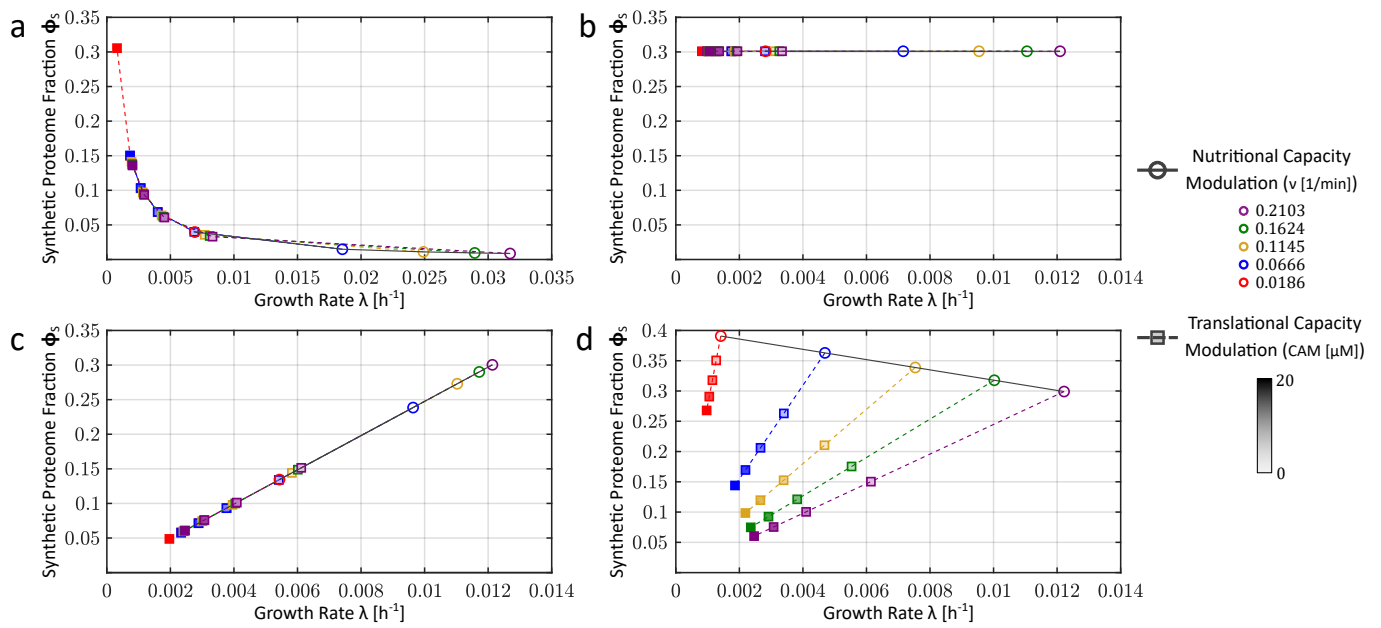

**Supplementary Fig. 20. Model predictions for the dependency of the expression of a constitutive gene on growth rate**  
 The proteome fraction occupied by the constitutive protein is plotted against the growth rate. In the model, growth is varied by two independent mechanisms: by changing the quality of nutrients (nutritional capacity, circles of different colors) or by adding sublethal concentrations of chloramphenicol (translational capacity, squares with shading that denotes CAM concentration). **(a)** Conventional non-host-aware model. **(b)** Model that includes translational resources. **(c)** Model that includes both transcriptional and translational resources. **(d)** Model that includes both transcriptional and translational resources, as well as an explicit dependency on the nutritional capacity  $\nu$ .

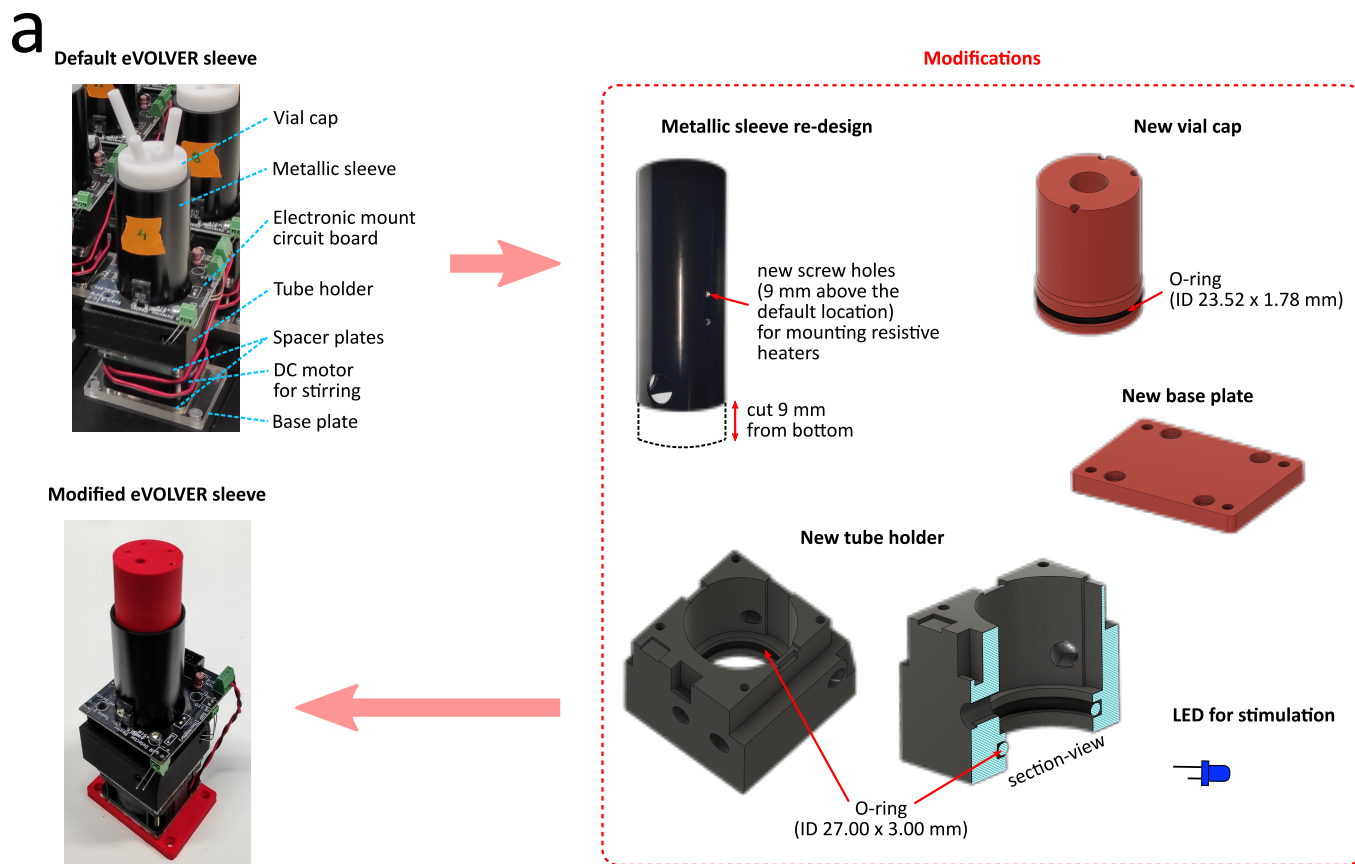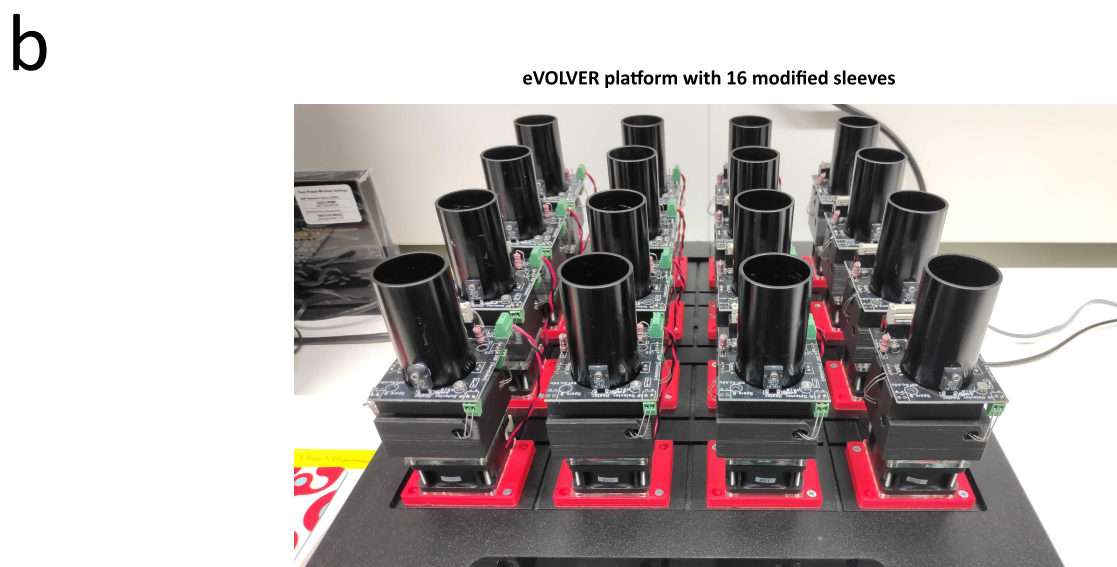

**Supplementary Fig. 21. Modified eVOLVER sleeve design.**

(a) Illustrated modifications resulted in stable and consistent OD measurement (as shown in Supplementary Figure 3) along with cell culture light stimulation capability. (b) eVOLVER platform with 16 modified sleeves.

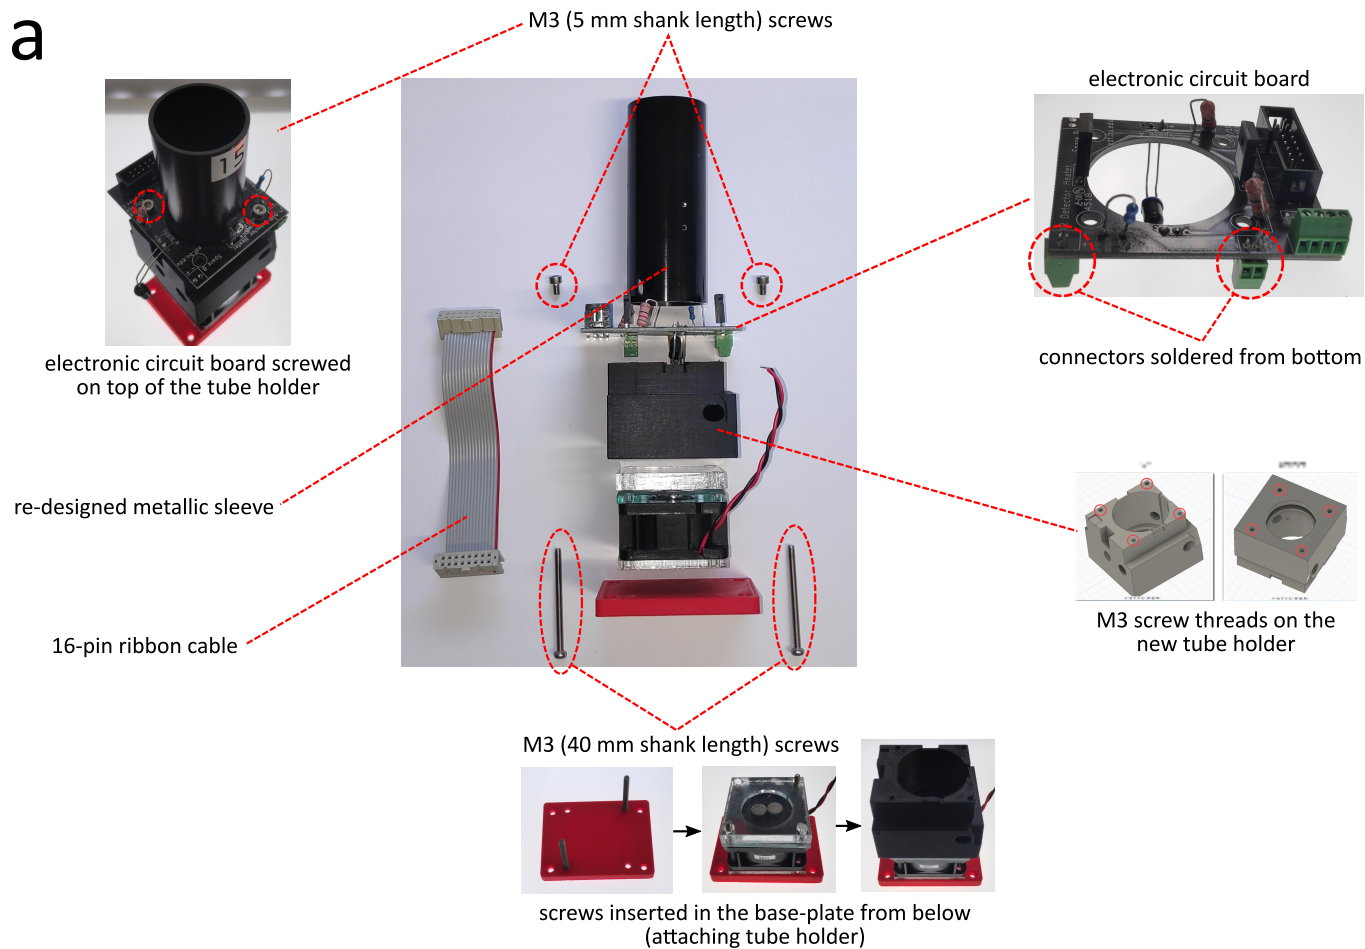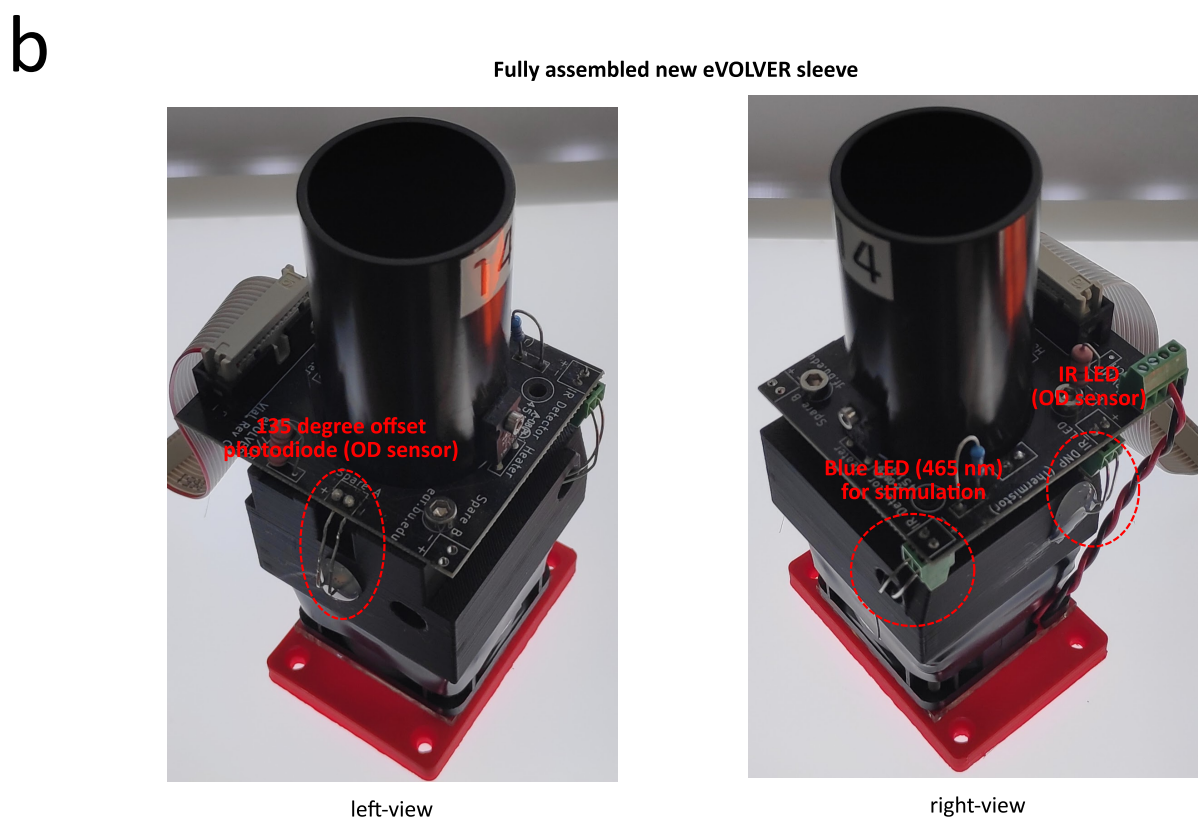

**Supplementary Fig. 22. Modified eVOLVER sleeve assembly.**  
 (a) Different components of the modified eVOLVER sleeve. (b) Fully assembled new eVOLVER sleeve with OD sensor (IR LED and photodiode) and blue LED for stimulation. This blue LED is connected to the electronic circuit board via a connector which was originally used for 90 degree offset photodiode in the default eVOLVER sleeve design.

**a**

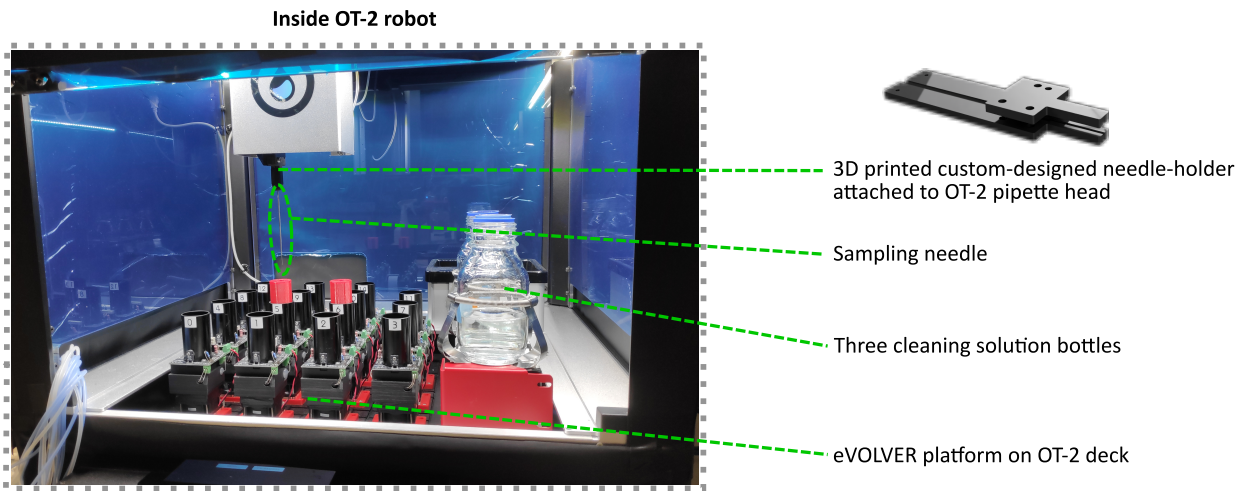

**b**

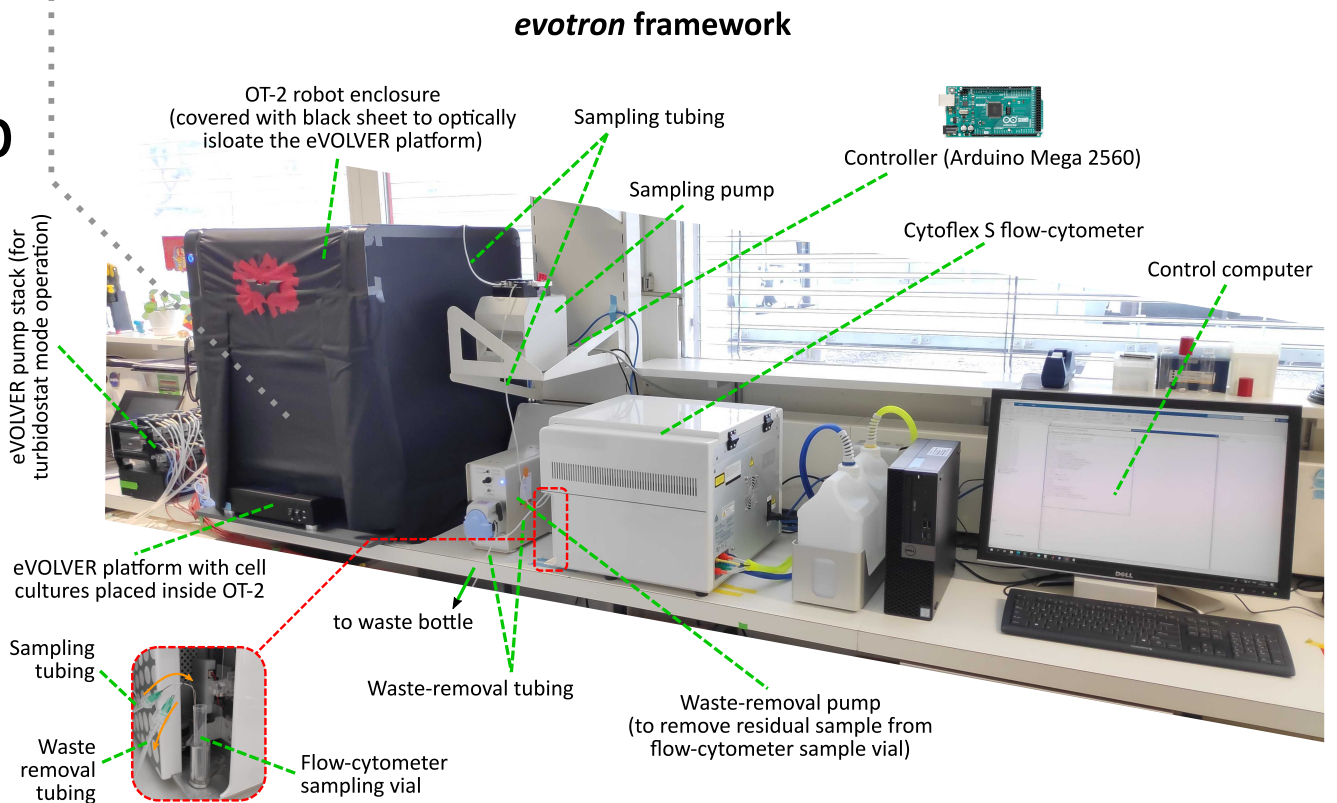

**Supplementary Fig. 23. evotron framework**

(a) Modified eVOLVER platform placed inside Opentrons OT-2 robot (b) Complete evotron framework assembled on a lab bench.

| Parameter           | Description                                                                                        | Value                  | Unit                               | Source             |
|---------------------|----------------------------------------------------------------------------------------------------|------------------------|------------------------------------|--------------------|
| $\hat{\alpha}_T$    | Effective T7-monomer production rate                                                               | $7.2 \cdot 10^{-3}$    | nM                                 | *                  |
| $\hat{\alpha}_C$    | Effective CAT production rate                                                                      | $6.467 \cdot 10^{-6}$  | nM min <sup>-1</sup>               | *                  |
| $K_G$               | $K_m$ of T7-promoter activation                                                                    | 57.1585                | nM                                 | *                  |
| $h_{ON}^{min}$      | Minimal dimerization rate                                                                          | $2.0202 \cdot 10^{-7}$ | nM <sup>-1</sup> min <sup>-1</sup> | *                  |
| $h_{ON}^{max}$      | Maximal dimerization rate                                                                          | $2.0020 \cdot 10^{-5}$ | nM <sup>-1</sup> min <sup>-1</sup> | *                  |
| $K_L$               | Light-dependent dimerization's $K_m$                                                               | $1.9851 \cdot 10^3$    | arb. units*                        | *                  |
| $n_L$               | Light-dependent dimerization's Hill coefficient                                                    | 1.3548                 |                                    | *                  |
| $n_G$               | Hill coefficient of T7-promoter activation                                                         | 1.5557                 |                                    | *                  |
| $h_C$               | Hill-exponent of CAM degradation                                                                   | 1.5388                 |                                    | *                  |
| $\gamma_{mol2fluo}$ | Conversion factor between molecule numbers and flow-cytometry arbitrary mCherry fluorescence units | 0.2549                 | nM <sup>-1</sup> arb. units **     | *                  |
| $L_0$               | Effective light-intensity corresponding to ambient light during pre-culturing                      | 196.3930               | arb. units*                        | *                  |
| $N_p$               | p15A plasmid copy number (CAT gene)                                                                | 10                     |                                    | (15) BNID: 105307  |
| $K_D$               | $K_m$ of CAM-ribosome binding reaction                                                             | 1300                   | nM                                 | (8)                |
| $\hat{K}_C$         | $K_m$ of CAM-ribosome binding reaction                                                             | 0.3333                 | nM min                             | (8)                |
| $\kappa$            | CAM diffusion rate                                                                                 | 90                     | min <sup>-1</sup>                  | (8)                |
| $n_r$               | effective ribosomal unit length                                                                    | 12221                  | aa                                 | Estimated from (5) |
| $n_T$               | T7-monomer length                                                                                  | 597                    | aa                                 | ‡                  |
| $n_C$               | CAT length                                                                                         | 219                    | aa                                 |                    |
| $g_0$               | Average translation rate per ribosome                                                              | 0.0987                 | min <sup>-1</sup>                  | Estimated from (5) |
| $\Phi_R^{max}$      | Maximal ribosomal proteome fraction                                                                | 0.5470                 |                                    | (5)                |
| $\Phi_{R_0}$        | Proteome fraction of inactive ribosomes                                                            | 0.0660                 |                                    | (5)                |
| $\rho_{cell}$       | Cell density (conversion factor between proteome fractions and molecules per cell)                 | $2 \cdot 10^9$         | aa fL <sup>-1</sup>                | (4)                |
| $\nu$               | Nutrient capacity of medium (LB)                                                                   | 0.1921                 | min <sup>-1</sup>                  | †                  |
| $A_E$               | External concentration of CAM                                                                      | $10.5 \cdot 10^3$      | nM                                 |                    |

**Supplementary Table 1. Parameter values used for simulations of photophilic strain and co-culture dynamics**

\*Obtained from fit to the photophilic strain's dynamic response. †Obtained from manual fitting to the growth rate of the photophilic strain in the absence of CAM. ‡Average between the length of the two T7 split units (16). \*Arbitrary units of light intensity. \*\*Arbitrary units of flow-cytometry mCherry fluorescence.

### 3 Plasmid sequences used in this study

| Strain                 | Host                          | Plasmids         |
|------------------------|-------------------------------|------------------|
| bJAG132 (photophilic)  | SKA1515 (BW25113 attB::venus) | pAB276, mJAG063  |
| bJAG234                | BW25113                       | mJAG090          |
| bJAG235 (constitutive) | BW25113                       | mJAG090, mJAG099 |
| bJAG236                | BW25113                       | mJAG090, mJAG100 |
| bJAG237                | BW25113                       | mJAG090, mJAG101 |
| bJAG367                | BW25113                       | mJAG019, mJAG168 |

**Supplementary Table 2. Strains and plasmids used in this study**

In the following, nucleotide sequences for the plasmids used in this study and listed in Supplementary Table 2 are provided in genbank format. Saving each text entry into a file with .gb extension and importing it into a sequence reader renders a fully-annotated plasmid map.

LOCUS pAB276 7559 bp ds-DNA circular 28-JUL-2022

DEFINITION .

FEATURES Location/Qualifiers  
rep\_origin complement(368..729)  
/label="pSC101 ori"  
terminator complement(746..840)  
/label="lambda t0 terminator"  
CDS complement(870..1730)  
/label="bla"  
misc\_feature 1867..1939  
/label="araB promoter"  
RBS 1954..1960  
/label="RBS"  
misc\_feature 1969..3657  
/label="T7 Pol (1-563)"  
misc\_feature 3658..3672  
/label="long gly-ala linker"  
misc\_feature 3673..4122  
/label="nMAGHigh1 (VVD)"  
terminator 4132..4229  
/label="rrnB T1 terminator"  
misc\_feature 4720..4792  
/label="araB promoter"  
RBS 4842..4848  
/label="RBS"  
misc\_feature 4887..5336  
/label="pMag (VVD1)"  
misc\_feature 5337..5351  
/label="long gly-ala linker"  
misc\_feature 5352..6311  
/label="T7 Pol (564-883)"  
misc\_feature 6596..7543  
/label="repA"

ORIGIN

```
1 AGGTGATTTT AATCACTATA CCAATTGAGA TGGGCTAGTC AATGATAATT ACTAGTCCTT
61 TTCCTTTGAG TTGTGGGTAT CTGTAAATTC TGCTAGACCT TTGCTGAAA ACTTGTAAT
121 TCTGCTAGAC CCTCTGTAAA TTCCGCTAGA CCTTTGTGTG TTTTTTTTGT TTATATTCAA
181 GTGGTTATAA TTTATAGAAT AAAGAAAGAA TAAAAAAGA TAAAAAGAAT AGATCCCAGC
241 CCTGTGTATA ACTCACTACT TTAGTCAGTT CCGCAGTATT ACAAAGGAT GTCGCAAACG
301 CTGTTTGCTC CTCTACAAAA CAGACCTTAA AACCCCTAAG GCTTAAGTAG CACCCTCGCA
361 AGCTCGGGCA AATCGTGAA TATTCCTTTT GTCTCCGACC ATCAGGCACC TGAGTCGCTG
421 TCTTTTTCGT GACATTCAGT TCGCTGCGCT CACGGCTCTG GCAGTGAATG GGGGTAAATG
481 GCACTACAGG CGCCTTTTAT GGATTCATGC AAGGAAACTA CCCATAATAC AAGAAAAGCC
541 CGTCACGGGC TTCTCAGGGC GTTTTATGGC GGGTCTGCTA TGTGGTGCTA TCTGACTTTT
601 TGCTGTTGAG CAGTTCCTGC CCTCTGATT TCCAGTCTGA CCACTTCGGA TTATCCCGTG
661 ACAGGTCATT CAGACTGGCT AATGCACCCA GTAAGGCAGC GGTATCATCA ACAGGCTTAC
721 CCGTCTTACT GTCCTTAGTG CTTGGATTCT CACCAATAAA AAACGCCCGG CGGCAACCGA
781 GCGTCTGAA CAAATCCAGA TGGAGTCTG AGGTCATTAC TGGATCTATC AACAGGAGTC
841 CAAGCGAGCT CGTAAACTTG GTCTGACAGT TACCAATGCT TAATCAGTGA GGCACCTATC
901 TCAGCGATCT GTCTATTTTC TGCATCCATA GTTGCCTGAC TCCCGTCTGT GTAGATAACT
961 ACGATACGGG AGGGCTTACC ATCTGGCCCC AGTGCTGCAA TGATACCGCG AGACCCACGC
1021 TCACCGGCTC CAGATTTATC AGCAATAAAC CAGCCAGCCG GAAGGGCCGA GCGCAGAAGT
1081 GGTCTGCAA CTTTATCCGC CTCCATCCAG TCTATTAATT GTTGCAGGGA AGCTAGAGTA
1141 AGTAGTTCGC CAGTTAATAG TTTGCGCAAC GTTGTGCCA TTGCTACAGG CATCGTGGTG
1201 TCACGCTCGT CGTTTGGTAT GGCTTCATTC AGCTCCGGTT CCCAACGATC AAGGCGAGTT
1261 ACATGATCCC CCATGTTGTG CAAAAAAGCG GTTAGCTCCT TCGGTCCTCC GATCGTTGTC
1321 AGAAGTAAGT TGGCCGAGT GTTATCACTC ATGGTTATGG CAGCACTGCA TAATTCTCTT
1381 ACTGTCATGC CATCCGTAAG ATGCTTTTCT GTGACTGGTG AGTACTCAAC CAAGTCATTC
1441 TGAGAATAGT GTATGCGGCG ACCGAGTTGC TCTTGCCCGG CGTCAATACG GGATAATACC
1501 GCGCCACATA GCAGAACTTT AAAAGTGCTC ATCATTGGAA AACGTTCTTC GGGGCGAAAA
1561 CTCTCAAGGA TCTTACCCTG GTTGTAGATCC AGTTCGATGT AACCCACTCG TGCACCCAAC
1621 TGATCTTCAG CATCTTTTAC TTTACCAGC GTTCTGGGT GAGCAAAAAA AGGAAGGCAA
```



1681 AATGCCGCAA AAAAGGGAAT AAGGGCGACA CGGAAATGTT GAATACTCAT ACTCTTCCTT  
1741 TTTCAATATT ATTGAAGCAT TTATCAGGGT TATTGTCTCA TGAGCGGATA CATATTTGAA  
1801 TGTATTTAGA AAAATAAACA AATAGGGGTT CCGCGCACAT TTCCCCGAAA AGTGCCACCT  
1861 GACGTCTAGC ATTTTTATCC ATAAGATTAG CGGATCCTAC CTGACGCTTT TTATCGCAAC  
1921 TCTCTACTGT TTCTCCATAC CCGTTTTTTT GGAAGGAGGT AAAGATCTAT GAACACGATT  
1981 AACATCGCTA AGAACGACTT CTCTGACATC GAACTGGCTG CTATCCCGTT CAACACTCTG  
2041 GCTGACCATT ACGGTGAGCG TTTAGCTCGC GAACAGTTGG CCCTTGAGCA TGAGTCTTAC  
2101 GAGATGGGTG AAGCACGCTT CCGCAAGATG TTTGAGCGTC AACTTAAAGC TGGTGAGGTT  
2161 GCGGATAACG CTGCCGCCAA GCCTCTCATC ACTACCCTAC TCCCTAAGAT GATTGCACGC  
2221 ATCAACGACT GGTTTGAGGA AGTGAAAGCT AAGCGCGGCA AGCGCCCGAC AGCCTTCCAG  
2281 TTCCTGCAAG AAATCAAGCC GGAAGCCGTA GCGTACATCA CCATTAAGAC CACTCTGGCT  
2341 TGCCTAACCA GTGCTGACAA TACAACCGTT CAGGCTGTAG CAAGCGCAAT CCGTCGGGCC  
2401 ATTGAGGACG AGGCTCGCTT CGGTCGTATC CGTGACCTTG AAGCTAAGCA CTTCAAGAAA  
2461 AACGTTGAGG ACAAACCTCA CAAGCGCGTA GGGCACGTCT ACAAGAAAGC ATTTATGCAA  
2521 GTTGTGAGG CTGACATGCT CTCTAAGGGT CTAAGCGGTG GCGAGGCGTG GTCTTCGTGG  
2581 CATAAGGAAG ACTTATTCA TGTAGGAGTA CGCTGCATCG AGATGCTCAT TGAGTCAACC  
2641 GGAATGGTTA GCTTACACCG CCAAAATGCT GGCGTAGTAG GTCAAGACTC TGAGACTATC  
2701 GAACTCGCAC CTGAATACGC TGAGGCTATC GCAACCCGTG CAGGTGCGCT GGCTGGCATC  
2761 TCTCCGATGT TCCAACCTTG CGTAGTTCCT CTAAGCCGTG GGACTGGCAT TACTGGTGGT  
2821 GGCTATTGGG CTAACGCTCG TCGTCTCTG GCGCTGGTGC TACTCACAG TAAGAAAGCA  
2881 CTGATGCGCT ACGAAGACGT TTACATGCCT GAGGTGTACA AAGCGATTAA CATTGCGCAA  
2941 AACACCGCAT GAAAAATCAA CAAGAAAGTC CTAGCGGTG CCAACGTAAT CACCAAGTGG  
3001 AAGCATTGTC CGGTCGAGGA CATCCCTGCG ATTGAGCGTG AAGAACTCCC GATGAAACCG  
3061 GAAGACATCG ACATGAATCC TGAGGCTCTC ACCGCGTGGA AACGTGCTGC CGCTGCTGTG  
3121 TACCGCAAGG ACAAGGCTCG CAAGTCTCGC CGTATCAGCC TTGAGTTCAT GCTTGAGCAA  
3181 GCCAATAAGT TTGCTAACCA TAAGGCCATC TGGTTCCCTT ACAACATGGA CTGGCGCGGT  
3241 CGTGTTTACG CTGTGTCAAT GTTCAACCCG CAAGGTAACG ATATGACCAA AGGACTGCTT  
3301 ACGCTGGCGA AAGGTAACC AATCGGTAAG GAAGGTTACT ACTGGTGAA AATCCACGGT  
3361 GCAAACGTG CCGGTGTCGA TAAGGTTCCG TTCCTGAGC GCATCAAGTT CATTGAGGAA  
3421 AACACGAGA ACATCATGGC TTGCGCTAAG TCTCCACTGG AGAACACTTG GTGGGCTGAG  
3481 CAAGATTCTC CGTTCGTCTT CCTTGCCTTC TGCTTTGAGT ACGCTGGGGT ACAGACCAC  
3541 GGCCTGAGCT ATAAGTCTC CCTTCCGCTG GCGTTTGACG GGTCTTGCTC TGGCATCCAG  
3601 CACTTCTCCG CGATGCTCCG AGATGAGGTA GGTGGTCCGG CGGTTAACTT GCTTCTggc  
3661 ggtTCTggag gtCACACTCT TTACGCCCTT GGAGGATACG ACATTATGGG ATATTTGGAT  
3721 CAGATTGGGA ACCGCCAAA CCCTCAGGTC GAACTGGGGC CTGTGGACAC GTCATGTGCC  
3781 CTGATCTGTG GCGATCTGAA GCAAAAGGAC ACTCCGATCG TCTACGCTC GGAAGCCTTC  
3841 TTGTATATGA CCGGATACAG CAATGCAGAG GTGCTCGGCA GGAAGTGCAG ATTCCTGCAG  
3901 TCCCCGACG GATGGTGAA ACCAAAGTCG ACTCGCAAAT ATGTGGACTC GAACACGATC  
3961 AACACCATCC GGAAGGCCAT CGACCCGAAC GCCGAGGTC AGGTGGAGGT GGTCAACTTT  
4021 AAGAAGAACG GCCAGCGGTT CGTGAACCTT CTGACCATCA TTCCGGTCCG GGATGAAACC  
4081 GGAGAGTACA GATACTCCAT GGGATTCCAG TCGAAAACCG AATAACCTAG GAGGCATCAA  
4141 ATAAAACGAA AGGCTCAGTC GAAAGACTGG GCCTTTCGTT TTATCTGTG TTTGTGCGTG  
4201 AACGCTCTCC TGAGTAGGAC AAATCCGCCG CCCTAGACCT AGCTGCAGCT AGGTACGGG  
4261 TTTTGCTGCC CGAAAACGGG CTGTTCTGGT GTTGCTAGTT TGTTATCAGA ATCGCAGATC  
4321 CCGGTTACAG cgGTTTCCCG GCTGAAAGCG CTATTCTTC CAGAATTGCC ATGATTTTTT  
4381 CCCACGGA GCGCTCACTG GCTCCCGTGT TGTCCGACG TTTGATTGGA TAAGCAGCAT  
4441 GCGCTGTTTC AGGCTGTCTA TGTGTGACTG TTGAGCTGTA ACAAGTTGTC TCAGGTGTTT  
4501 AATTCATGT TCTAGTTGCT TTGTTTTACT GGTTCACCT GTTCTATTAG GTGTACATG  
4561 CTGTTTATCT GTTACATTGT CGATCTGTTT ATGGTGAACA GCTTTgAATG CACCAAAAAC  
4621 TCGTAAAAGC TCTGATGAT CTATCTTTTT TACACCGTTT TCATCTGTGc atgcGCCGAT  
4681 CAACGTCTCA TTTTCGCCAG ATATCGGcgc gccgcttcgT AGCATTTTTA TCCATAAGAT  
4741 TAGCGGATCC TACCTGACGC TTTTTATCGC AACTCTCTAC TGTTTCTCCA TGGGAGACCA  
4801 CAACGGTTTC CCTCTAGAAA TAATTTGTT TAACTTAAG AAGGAGGTCA TACCCGTTTT  
4861 TTTGGAAGGA GGTAAATTA TTAATGCACA CTCTTACGC CCCTGGAGGA TACGACATTA  
4921 TGGGATATTT GCGGCAGATT AGGAACCGCC CAAACCCTCA GGTGCAACTG GGGCCTGTGG  
4981 ACACGTATG TGCCCTGATC CTGTGCGATC TGAAGCAAAA GGACACTCCG ATCGTCTACG  
5041 CCTCGGAAGC CTTCTTGAT ATGACCGGAT ACAGCAATGC AGAGGTGCTC GGCAGGAACT  
5101 GCAGATTCTC GCAGTCCCC GACGGGATGG TGAAACCAAAA GTCGACTCGC AAATATGTGG  
5161 ACTCGAACAC GATCAACACC ATGCGGAAGG CCATCGACCG GAACGCCGAG GTCCAGGTGG  
5221 AGGTGGTCAA CTTAAGAAG AACGGCCAGC GGTTCGTGAA CTTTCTGACC ATGATCCGG  
5281 TCCGGGATGA AACCGGAGAG TACAGATACT CCATGGGATT CCAGTGCAGG ACCGAAggcg  
5341 gtTCTggagg tAGTAAACC GTTCAGGACA TCTACGGGAT TGTTGCTAAG AAAGTCAACG



5401 AGATTCTACA AGCAGACGCA ATCAATGGGA CCGATAACGA AGTAGTTACC GTGACCGATG  
5461 AGAACACTGG TGAATCTCT GAGAAAGTCA AGCTGGGCAC TAAGGCACTG GCTGGTCAAT  
5521 GGCTGGCTTA CGGTGTTACT CGCAGTGTGA CTAAGaGTTT AGTCATGACG CTGGCTTACG  
5581 GGTCCAAAGA GTTCGGCTTC CGTCAACAAG TGCTGGAAGA TACCATTGAG CCAGCTATTG  
5641 ATTCCGGCAA GGGTCTGATG TTCACTCAGC CGAATCAGGC TGCTGGATAC ATGGCTAAGC  
5701 TGATTTGGGA ATCTGTGAGC GTGACGGTGG TAGCTGCGGT TGAAGCAATG AACTGGCTTA  
5761 AGTCTGTGTC TAAGCTGCTG GCTGCTGAGG TCAAAGATAA GAAGACTGGA GAGATTCTTC  
5821 GCAAGCGTTG CGTGTGTCAT TGGGTAATC CTGATGGTTT CCCTGTGTGG CAGGAATACA  
5881 AGAAGCCTAT TCAGACGCGC TTGAACCTGA TGTTCCCTCG TCAGTCCCGC TTACAGCCTA  
5941 CCATTAACAC CAACAAAGAT AGCGAGATTG ATGCACACAA ACAGGAGTCT GGTATCGCTC  
6001 CTAACCTTGT ACACAGCCAA GACGGTAGCC ACCTTCGTAA GACTGTAGTG TGGGCACACG  
6061 AGAAGTACGG AATCGAATCT TTTGCACTGA TTCAGACTC CTTCCGTACC ATTCCGGCTG  
6121 ACGCTGGCAA CCTGTTCAAA GCAGTGCAGG AACTATGGT TGACACATAT GAGTCTGTG  
6181 ATGTACTGGC TGATTTCTAC GACCACTTCG CTGACCAGTT GCACGAGTCT CAATTGGACA  
6241 AAATGCCAGC ACTTCCGGCT AAAGGTAAT TGAACCTCCG TGACATCTTA GAGTCGGACT  
6301 TCGCGTTCGC GTAATCTAGA GGCATCAAA AAAACGAAAG GCTCAGTCGA AAGACTGGGC  
6361 TTTTCGTTTT AGTCTTGATG CTTCACTGAT AGATACAAGA GCCATAAGAA CCTCAGATCC  
6421 CTAGACCTAG CTGCAGTAG GGTACGGGTT TTGCTGCCCG CAAACGGGCT GTTCTGGTGT  
6481 TGCTAGGatc CATATGGACA GTTTCCCTT TGATATgTAA CGGTGAAACAG TTGTCTACT  
6541 TTTGTTTTGT AGTCTTGATG CTTCACTGAT AGATACAAGA GCCATAAGAA CCTCAGATCC  
6601 TTCCGTATTT AGCCAGTATG TTCTCTAGTG TGGTTCGTTG TTTTTCGCTG AGCCATGAGA  
6661 ACGAACCACT GAGATCATaC TTACTTTGCA TGTCACCTCAA AAATTTTGCC TCAAAACTGG  
6721 TGAGCTGAAT TTTGCACTT AAAGCATCGT GTAAGTGTTC TCTTAGTCCG TTAatGTAGGT  
6781 AGGAATCTGA TGTAATGGTT GTTGGTATTT TGTCACCATT CATTTTTATC TGGTGTCTCT  
6841 CAAGTTCGGT TACGAGATCC ATTTGTCTAT CTAGTTCAAC TGGGAAAATC AACGTATCAG  
6901 TCGGGCGGCC TCGCTTATCA ACCACCAATT TCATATTGCT GTAAGTGTTC AAATCTTTAC  
6961 TTATTGGTTT CAAAACCCAT TGGTTAAGCC TTTTAAACTC ATGGTAGTTA TTTTCAAGCA  
7021 TTAACATGAA CTTAAATTCA TCAAGGCTAA TCTCTATATT TGCCTTGTGA GTTTTCTTTT  
7081 GTGTTAGTTC TTTAATAAC CACTCATAAA TCCTCATAGA GTATTTGTTT TCAAAAAGACT  
7141 TAACATGTTT CAGATTATAT TTTATGAATT TTTTAACTG GAAAAGATAA GGCAATATCT  
7201 CTTCACTAAA AACTAATTCT AATTTTTTCG TTGAGAACTT GGCATAGTTT GTCCACTGGA  
7261 AAATCTCAA GCCTTTAACC AAAGGATTCC TGATTTCCAC AGTTCTCGTC ATCAGCTCTC  
7321 TGGTTGCTTT AGCTAATACA CCATAAGCAT TTTCCCTACT GATGTTTATC ATCTGAGCGT  
7381 ATTGGTTATA AGTGAACGAT ACCGTCGGTT CTTTCCTTGT AGGGTTTCA ATCGTGGGGT  
7441 TGAGTAGTGC CACACAGCAT AAAATTAGCT TGGTTTCATG CTCCGTTAAG TCATAGCGAC  
7501 TAATCGCTAG TTCATTTGCT TTGAAAACAA CTAATTCAGA CATACTCTC AATTGGTCT

//

LOCUS mJAG063 3223 bp ds-DNA circular 28-JUL-2022

DEFINITION .

FEATURES Location/Qualifiers  
terminator 60..165  
/label="lambda T0 terminator"  
CDS complement(173..964)  
/label="specR"  
promoter 1119..1136  
/label="T7\_promoter (-17 to +1)"  
CDS 1180..1835  
/label="CmR"  
misc\_feature 1840..1898  
/label="Terminator L3S2P21"  
terminator 1917..2014  
/label="rrnB T1 terminator"  
rep\_origin 2481..3168  
/label="p15A ori"

ORIGIN

1 ATTTATCTCT TCAAATGTAG CACCTGAAGT CAGCCCCATA CGATATAAGT TGTTACTAGT  
61 GCTTGGATTC TCACCAATAA AAAACGCCCG GCGGCAACCG AGCGTCTGA ACAATCCAG  
121 ATGGAGTCT GAGGTCATTA CTGGATCTAT CAACAGGAGT CCAAGCGAGC TCTTATTGCG  
181 CGACTACCTT GGTGATCTCG CCTTTCACGT AGTGGACAAA TCTTCCAAC TGATCTGCGC  
241 GCGAGGCCAA GCGATCTTCT TCTTGCCAA GATAAGCCTG TCTAGCTTCA AGTATGACGG  
301 GCTGATACTG GGC CGG CAGG CGCTCCATTG CCCAGTCGGC AGCGACATCC TTCGGCGCGA  
361 TTTTGCCGGT TACTGCGCTG TACCAAATGC GGGACAACGT AAGCACTACA TTTGCTCAT  
421 CGCCAGCCCA GTCGGGCGGC GAGTTCATA GCGTTAAGGT TTCATTTAGC GCCTCAAATA  
481 GATCTGTTC AGGAACCGGA TCAAAGAGTT CCTCCGCCG TGGACCTACC AAGGCAACGC  
541 TATGTTCTCT TGCTTTTGTG AGCAAGATAG CCAGATCAAT GTCGATCGTG GCTGGCTCGA  
601 AGATACCTGC AAGAATGTCA TTGCGTGCC ATTCTCCAAA TTGCAGTCG CGCTTAGCTG  
661 GATAACGCCA CGGAATGATG TCGTCGTGCA CAACAATGGT GACTTCTACA GCGCGGAGAA  
721 TCTCGCTCTC TCCAGGGGAA GCCGAAGTTT CCAAAGGTC GTTGATCAA GCTCGCGCGG  
781 TTGTTTCATC AAGCCTTACG GTCACCGTAA CCAGCAAATC AATATCACTG TGTGGCTTCA  
841 GGCCGCCATC CACTGCGGAG CCGTACAAAT GTACGGCCAG CAACGTCGGT TCGAGATGGC  
901 GCTCGATGAC GCCAACTACC TCTGATAGTT GAGTCGATAC TTCGGCGATC ACCGCTTCCC  
961 TCATGCGAAA CGATCCTCAT CCTGTCTCTT GATCAGATAT TGATCCCCTG CGCCATCAGA  
1021 TCCTTGGCGG CAAGAAAGCC ATCCAGTTTA CTTTGCAGGG CTCCCAACC TTACCAGAGG  
1081 GCGCCCAGC TGGCAATTCC GACGTCGcgg cegcAGGGTA ATACGACTCA CTATAGGGAG  
1141 AGGATCCTGT CAATTTCCCG GATAGAGGAG GTAagatcAA TGGAGAAAAA AATCACTGGA  
1201 TATACCACCG TTGATATATC CCAATGGCAT CGTAAAGAAC ATTTTGAGGC ATTTCAGTCA  
1261 GTTGCTCAAT GTACCTATAA CCAGACCGTT CAGCTGGATA TTACGGCCTT TTTAAAGACC  
1321 GTAAAGAAAA ATAAGCACA GTTTTATCCG GCCTTTATTC ACATTTCTGC CCGCTGATG  
1381 AATGCTCATC CGGAATTTCC TATGGCAATG AAAGACGGTG AGCTGGTGAT ATGGGATAGT  
1441 GTTACCCTT GTTACACCGT TTTCCATGAG CAAACTGAAA CGTTTTTCATC GCTCTGGAGT  
1501 GAATACCACG ACGATTTCCG GCAGTTTCTA CACATATATT CGCAAGATGT GCGGTGTTAt  
1561 GGTGAAAACC TGGCCTATTT CCCTAAAGGG TTTATTGAGA ATATGTTTTT CGTCTCAGCC  
1621 AATCCCTGGG TGAGTTTCAC CAGTTTTGAT TAAACGTGG CCAATATGGA CAACTTCTTC  
1681 GCCCCCGTTT TCACCATGGG CAAATATTAT ACGCAAGGCG ACAAGGTGCT GATGCCGCTG  
1741 GCGATTCAGG TTCATCATGC CGTtTGATG GCTTCCATG TCGGCAGAAT GCTTAATGAA  
1801 TTACAACAGT ACTGCGATGA GTGGCAGGGC GGGGCGTAAC TCGGTACCAA ATTCAGAAA  
1861 AGAGGCCTCC CGAAAGGGG GCCTTTTTTC GTTTTGGTCC AAgcggccgc CCTAGGAGGC  
1921 ATCAAATAAA ACGAAAGGCT CAGTCGAAAG ACTGGGCCCT TCGTTTTATC TGTTGTTTGT  
1981 CGGTGAAACG TCTCCTGAGT AGGACAAAATC CGCCGCCCTA GACCTAGCTG CAGCTAGGGT  
2041 ACGGGTTTTG CTGCCGCAA ACGGGCTGTT CTGGTGTTC TAGTTTGTTA TCAGAAATCGC  
2101 AGATCCGCTC TCAGccgGTT TGCCGGCTGA AAGCGCTATT TCTTCCAGAA TTGCCATGAT  
2161 TTTTCCCCA CCGGAGGCGT CACTGGCTCC CGTGTGTGCG GCAGCTTGA TTCGATAAGC  
2221 AGCATCGCCT GTTTCAGGCT GTCTATGTGT GACTGTTGAG CTGTAACAAG TTGTCTCAGG  
2281 TGTTCATTT CATGTTCTAG TTGCTTTGTT TTA CTGGTTT CACCTGTTCT ATTAGGTGTT  
2341 ACATGCTGTT CATCTGTTAC ATGTGCGATC TGTTTCATGGT GAACAGCTTT gAATGCACCA  
2401 AAAACTCGTA AAAGCTCTGA TGTATCTATC TTTTTTACAC CGTTTTTCATC TGTGcatgcA  
2461 cgaagcggcg cgCCCATATG GGATATATTC CGCTTCCTCG CTCACTGACT CGCTACGCTC  
2521 GGTCTGTCGA CTGCGGCGAG CGGAAATGGC TTACGAACGG GCGCGAGATT TCCTGGAAGA  
2581 TGCCAGGAAG ATACTTAACA GGAAGTGAG AGGGCCCGCG CAAAGCCGTT TTTCCATAGG

2641 CTCGCCCCCT CTGACAAGCA TCACGAAATC TGACGCTCAA ATCAGTGGTG GCGAAACCCG  
2701 ACAGGACTAT AAAGATACCA GGCCTTTCCC CCTGGCGGCT CCCTCGTGCG CTCTCCTGTT  
2761 CCTGCCTTTC GGTTTACCGG TGCATTCCG CTGTTATGGC CGCGTTTGTC TCATTCCACG  
2821 CCTGACTCTC AGTTCGGGT AGGCAGTTCG CTCCAAGCTG GACTGTATGC ACGAACCCCT  
2881 CGTTCAGTCC GACCGCTGCG CCTTATCCGG TAACTATCGT CTTGAGTCCA ACCCGGAAAAG  
2941 ACATGCAAAA GCACCACTGG CAGCAGCCAC TGGTAATTGA TTTAGAGGAG TTAGTCTTGA  
3001 AGTCATGCGC CGGTTAAGGC TAAACTGAAA GGACAAGTTT TGGTGACTGC GCTCCTCCAA  
3061 GCCAGTTACC TCGGTTCAAA GAGTTGGTAG CTCAGAGAAC CTTGAAAAA CCGCCCTGCA  
3121 AGGCGGTTTT TTCGTTTTCA GAGCAAGAGA TTACGCGCAG ACCAAAAACGA TCTCAAGAAG  
3181 ATCATCTTAT TAATCAGATA AAATATTACT AGATTTCAGT GCA

//

LOCUS mJAG090 3172 bp ds-DNA circular 28-JUL-2022

DEFINITION .

FEATURES Location/Qualifiers  
terminator complement(53..147)  
/label="lambda t0 terminator"  
Antibiotic Resistance complement(177..1037)  
/label="AmpR"  
terminator 1186..1351  
/label="rrnBT1T2 terminator - truncated"  
misc\_feature 1356..1399  
/label="J23101 mutant (Weak Constitutive Promoter)"  
ribozyme 1416..1493  
/label="AraJ (Insulator Ribozyme)"  
RBS 1498..1517  
/label="B0033m (RBS)"  
CDS 1522..2199  
/label="mcherry226"  
misc\_feature 2206..2266  
/label="Terminator L3S2P21 (synthetic, strong)"  
terminator 2282..2379  
/label="rrnB T1 terminator"  
rep\_origin complement(2517..3160)  
/label="colE1 ori"

ORIGIN

1 TCAGTGAAC GAAAACCTCAC GTTAAGGGAT TTTGGTCATG ACTAGTGCTT GGATTCTCAC  
61 CAATAAAAA CGCCCGGCG CAACCGAGCG TTCTGAACAA ATCCAGATGG AGTTCTGAGG  
121 TCATTACTGG ATCTATCAAC AGGAGTCCAA GCGAGCTCGT AAACCTGGTC TGACAGTTAC  
181 CAATGCTTAA TCAGTGAGGC ACCTATCTCA GCGATCTGTC TATTTCGTTT ATCCATAGTT  
241 GCCTGACTCC CCGTCGTGTA GATAACTACG ATACGGGAGG GCTTACCATC TGGCCCCAGT  
301 GCTGCAATGA TACCGCGcga CCCACGCTCA CCGGCTCCAG ATTTATCAGC AATAAACCCAG  
361 CCAGCCGAA GGGCCGAGCG CAGAAGTGGT CCTGCAACTT TATCCGCTC CATCCAGTCT  
421 ATTAATTGTT GCCGGGAAGC TAGAGTAAGT AGTTCGCCAG TTAATAGTTT GCGCAACGTT  
481 GTTGCCATTG CTACAGGCAT CGTGGTGTCA CGCTCGTCTG TTGGTATGGC TTCATTCAGC  
541 TCCGGTCCC AACGATCAAG GCGAGTTACA TGATCCCCCA TGTTGTGCAA AAAAGCGGTT  
601 AGCTCCTTCG GTCCTCCGAT CGTTGTCAGA AGTAAGTTGG CCGCAGTGT ATCACTCATG  
661 GTTATGGCAG CACTGCATAA TTCTCTTACT GTCATGCCAT CCGTAAGATG CTTTTCTGTG  
721 ACTGGTGAGT ACTCAACCAA GTCATTCTGA GAATAGTGTA TGCGGCGACC GAGTTGCTCT  
781 TGCCCGCGT CAATACGGGA TAATACCGCG CCACATAGCA GAACTTTAAA AGTGCTCATC  
841 ATTGAAAAAC GTTCTTCGGG GCGAAAACTC TCAAGGATCT TACCGCTGTT GAGATCCAGT  
901 TCGATGTAAC CCACTCGTGC ACCCAACTGA TCTTCAGCAT CTTTTACTTT CACCAGCGTT  
961 TCTGGGTGAG CAAAAACAGG AAGGCAAAAT GCCGAAAAA AGGGAATAAG GCGCACACGG  
1021 AAATGTTGAA TACTCATACT CTTCCTTTTT CAATATTATT GAAGCATTTA TCAGGGTTAT  
1081 TGTCTCATGA GCGGATACAT ATTTGAATGT ATTTAGAAAA ATAAACAAAT AGGGTTCCG  
1141 GGCACATTC CCCGAAAAGT GCCACCTGAC GTCGcgcccg cAGGGGGCTG TTTTGGCGGA  
1201 TGAGAGAAGA TTTTCAGCCT GATACAGATT AAATCAGAAC GCAGAAGCGG TCTGATAAAA  
1261 CAGAAATTCG CTGGCGGCG TAGCGGGTG GTCCACCTG ACCCATGCC GAACTCAGAA  
1321 GTGAAACGCC GTAGCGCCGA TGGTAGTGTG GAGCAcattc tagagtttac agctagctca  
1381 gtcctagta tatgctagcA TAGGTGTGGT CATAGAGTGG TCGTGTATCTG AAACCTCGATC  
1441 ACCTGATGAG CTCAAGGCAG AGCGAAACCA CCTCTACAAA TAATTTTGTT TAATACTaga  
1501 gtcacacagg actactaAAT GGCTATCATT AAAGAGTTCA TGCGCTTCAA AGTTCACATG  
1561 GAGGGTCTG TTAACGGTCA CGAGTTCGAG ATCGAAGGCG AAGGCGAGGG CCGTCCGTAT  
1621 GAAGGCACCC AGACCGCAA ACTGAAAGTG ACTAAAGGCG GCCCGCTGCC TTTTGGCTGG  
1681 GACATCCTGA GCCCGCAATT TATGTACGGT TCTAAAGCGT ATGTTAAACA CCCAGCGGAT  
1741 ATCCCGGACT ATCTGAAGCT GTCTTTTCCG GAAGGTTTCA AGTGGGAACG CGTAATGAAT  
1801 TTTGAAGATG GTGGTGTCTG GACCGTCACT CAGGACTCCT CCCTGCAGGA TGGCGAGTTC  
1861 ATCTATAAAG TTAACCTGCG TGGTACTAAT TTTCCATCTG ATGGCCCGGT GATGCAGAAA  
1921 AAGACGATGG GTTGGGAGGC GTCTAGCGAA CGCATGTATC CGGAAGATGG TGCGCTGAAA  
1981 GGCGAAATTA AACAGCGCCT GAAACTGAAA GATGGCGGCC ATTATGACGC TGAAGTGAAA  
2041 ACCACGTACA AAGCCAAGAA ACCTGTGCAG CTGCCTGGCG CGTACAATGT GAATATTTAA  
2101 CTGACATCA CCTCTCATAA TGAAGATTAT ACGATCGTAG AGCAATATGA GCGCGCGGAG  
2161 GGTCTGTCATT CTACCGGTGG CATGGATGAG CTGTACAAAT AGTAACTCGG TACCAAAATTC  
2221 CAGAAAAGAG GCCTCCCGAA AGGGGGCCT TTTTTCGTTT TGGTCCAAGc ggccgcTCTA

2281 GAGGCATCAA ATAAAACGAA AGGCTCAGTC GAAAGACTGG GCCTTTCGTT TTATCTGTTG  
2341 TTTGTCCGGT AACGCTCTCC TGAGTAGGAC AAATCCGCCG CCCTAGACCT AGCTGCAGCT  
2401 AGGGCGTTCG GCTGCGGCGA GCGGTATCAG CTCACTCAAA GGCGGTAATA CGGTTATCCA  
2461 CAGAATCAGG GGATAACGCA GGAAAGAACA TGTGAGCAAA AGGCCAGCAA AAGGCCAGGA  
2521 ACCGTAAAAA GGCCGCGTTG CTGGCGTTTT TCCATAGGCT CCGCCCCCT GACGAGCATC  
2581 AAAAAATCG ACGCTCAAGT CAGAGGTGGC GAAACCCGAC AGGACTATAA AGATACCAGG  
2641 CGTTTCCCCC TGGAAGCTCC CTCGTGCGCT CTCCTGTTCC GACCCTGCCG CTTACCGGAT  
2701 ACCTGTCCGC CTTTCTCCCT TCGGGAAGCG TGGCGCTTTC TCA<sub>t</sub>aGCTCA CGCTGTAGGT  
2761 ATCTCAGTTC GGTGTAGGTC GTTCGCTCCA AGCTGGGCTG TGTGCACGAA CCCCCGTTT  
2821 AGCCCGACCG CTGCGCCTTA TCCGGTAACT ATCGTCTTGA GTCCAACCCG GTAAGACACG  
2881 ACTTATCGCC ACTGGCAGCA GCCACTGGTA ACAGGATTAG CAGAGCGAGG TATGTAGGCG  
2941 GTGCTACAGA GTTCTTGAAG TGGTGGCCTA ACTACGGCTA CACTAGAAGG ACAGTATTG  
3001 GTATCTGCGC TCTGTGAAG CCAGTTACCT TCGGAAAAAG AGTTGGTAGC TCTTGATCCG  
3061 GCAAACAAAC CACCGTGGT AGCGGTGGT TTTTGTGTTG CAAGCAGCAG ATTACGCGCA  
3121 GAAAAAAGG ATCTCAAGAA GATCCTTGA TCTTTCTAC GGGGTCTGAC GC

//

LOCUS mJAG099 4224 bp ds-DNA circular 28-JUL-2022

DEFINITION .

FEATURES  
Location/Qualifiers  
rep\_origin complement(219..580)  
/label="pSC101 ori"  
terminator complement(597..691)  
/label="lambda t0 terminator"  
CDS complement(703..1494)  
/label="specR"  
misc\_feature 1657..1690  
/label="J23101 mutant (Weak Constitutive Promoter)"  
RBS 1710..1723  
/label="BBa\_B0031 (RBS)"  
CDS 1725..2384  
/label="CmR"  
misc\_feature 2385..2445  
/label="Terminator L3S2P21 (synthetic, strong)"  
terminator 2469..2566  
/label="rrnB T1 terminator"  
CDS complement(3112..4059)  
/label="repA"

ORIGIN

1 ACCTTTGTGT GTTTTTTTGG TTTATATTCA AGTGGTTATA ATTTATAGAA TAAAGAAAGA  
61 ATAAAAAAG ATAAAAAGAA TAGATCCCAG CCCTGTGTAT AACTCACTAC TTTAGTCAGT  
121 TCCGCAGTAT TACAAAAGGA TGTCGCAAAC GCTGTTTGCT CCTCTACAAA ACAGACCTTA  
181 AAACCCTAAA GGCTTAAGTA GCACCCTCGC AAGCTCGGGC AAATCGCTGA ATATTCCTTT  
241 TGTCTCCGAC CATCAGGCAC CTGAGTCGCT GTCTTTTTCG TGACATTGAG TTCGCTGCGC  
301 TCACGGCTCT GGCAGTGAAT GGGGGTAAAT GGCACCTACAG GCGCCTTTTA TGGATTGATG  
361 CAAGGAAACT ACCCATAATA CAAGAAAAGC CCGTCACGGG CTTCTCAGGG CGTTTTATGG  
421 CGGGTCTGCT ATGTGGTGCT ATCTGACTTT TTGCTGTTCA GCAGTTCCTG CCCTCTGATT  
481 TTCCAGTCTG ACCACTTCGG ATTATCCCGT GACAGGTCAT TCAGACTGGC TAATGCACCC  
541 AGTAAGGCAG CGGTATCAGC AACAGGCTTA CCCGCTTAC TGTCCTTAGT GCTTGGATTG  
601 TCACCAATAA AAAACGCCCG GCGGCAACCG AGCGTCTGTA ACAAATCCAG ATGGAGTTCT  
661 GAGGTCATTA CTGGATCTAT CAACAGGAGT CCAAGCGAGC TCTTATTTGC CGACTACCTT  
721 GGTGATCTCG CCTTTCACGT AGTGGACAAA TTCTCCAAC TGATCTGCGC GCGAGGCCAA  
781 GCGATCTTCT TCTGTGCCA GATAAGCCTG TCTAGCTTCA AGTATGACGG GCTGATACTG  
841 GCGCGGCGAG CGTCCATTG CCCAGTCGGC AGCGACATCC TTCGGCGCGA TTTTGCCGGT  
901 TACTGCGCTG TACCAATGC GGGACAACGT AAGCACTACA TTTCGCTCAT CGCCAGCCCA  
961 GTCGGGCGGC GAGTTCATA GCGTAAAGGT TTCATTTAGC GCCTCAAATA GATCCTGTTC  
1021 AGGAACCGGA TCAAAGAGTT CCTCCGCCG TGGACCTACC AAGGCAACGC TATGTTCTCT  
1081 TGCTTTTGTG AGCAAGATAG CCAGATCAAT GTCGATCGTG GCTGGCTCGA AGATACCTGC  
1141 AAGAATGTCA TTGCGTGCC ATTCTCCAAA TTGCAGTTG CGCTTAGCTG GATAACGCCA  
1201 CGGAATGATG TCGTCGTGCA CAACAATGGT GACTTCTACA GCGCGGAGAA TCTGCTCTC  
1261 TCCAGGGGAA GCCGAAGTTT CCAAAAGGTC GTTGATCAAA GCTCGCCGCG TTGTTTCATC  
1321 AAGCCTTACG GTCACCGTAA CCAGCAAATC AATATCACTG TGTGGCTTCA GGCCGCCATC  
1381 CACTGCGGAG CCGTACAAAT GTACGGCCAG CAACGTCGGT TCGAGATGGC GCTCGATGAC  
1441 GCCAACTACC TCTGATAGTT GAGTCGATAC TTCGGCGATC ACCGCTTCCC TCATGCGAAA  
1501 CGATCCTCAT CCTGTCTCTT GATCAGATAT TGATCCCTG CGCCATCAGA TCCTTGGCGG  
1561 CAAGAAAGCC ATCCAGTTTA CTTTGAGGG CTTCCCAACC TTACAGAGG GCGCCCCAGC  
1621 TGGCAATTC GACGTCgcg cgcgaaGAC ATAGGGttaa cagctagctc agtcctaggt  
1681 atatgctagc AGCGATAACA AACTTTGACT CACACAGGAA ACCAATGGAG AAAAAATCA  
1741 CTGGATATAC CACCGTTGAT ATATCCCAAT GGCATCGTAA AGAACATTTT GAGGCATTTT  
1801 AGTCAGTTGC TCAATGTACC TATAACCAGA CCGTTCAGCT GGATATTAGC GCCTTTTAA  
1861 AGACCGTAAA GAAAAATAAG CACAAGTTT ATCCGGCCTT TATTCACATT CTGCCCCGCC  
1921 TGATGAATGC TCATCCGGAA TTTCGTATGG CAATGAAAGA CCGGTGAGCTG GTGATATGGG  
1981 ATAGTGTTC AACTTGTACC ACCGTTTTCC ATGAGCAAAC TGAAACGTTT TCATCGCTCT  
2041 GGAGTGAATA CCACGACGAT TTCCGGCAGT TTCTACACAT ATATTTCGAA GATGTGGCGT  
2101 GTTAAtGGTGA AAACCTGGCC TATTTCCCTA AAGGGTTTAT TGAGAAATAG TTTTTCGTCT  
2161 CAGCCAATCC CTGGGTGAGT TTCACCAAGT TTGATTTAAA CGTGGCCAAT ATGGACAAC  
2221 TCTTCGCCCC CGTTTTACAC ATGGGCAAAT ATTATACGCA AGGCGACAAG GTGCTGATGC  
2281 CGCTGGCGAT TCAGGTTTCT CATGCCGtT GTGATGGCTT CCATGTGCGC AGAATGCTTA  
2341 ATGAATTACA ACAGTACTGC GATGAGTGGC AGGGCGGGGC GTAACCTCGT ACCAAATTCC

2401 AGAAAAGAGG CCTCCCGAAA GGGGGGCCTT TTTTCGTTTT GGTCCAAATG TCTTCg<sub>cggc</sub>  
2461 cg<sub>c</sub>TCTAGAG GCATCAAATA AAACGAAAGG CTCAGTCGAA AGACTGGGCC TTTTCGTTTTA  
2521 TCTGTTGTTT GTCGGTGAAC GCTCTCCTGA GTAGGACAAA TCCGCCGCC TAGACCTAGC  
2581 TGCAGCTAGG GTACGGGTTT TGCTGCCCGC AAACGGGCTG TTCTGGTGTT GCTAGTTTGT  
2641 TATCAGAAATC GCAGATCCGG CTCAGc<sub>cgg</sub> TTTGCCGGCT GAAAGCGCTA TTTCTCCAG  
2701 AATTGCCATG ATTTTTTCCC CACGGGAGGC GTCACTGGCT CCCGTGTGT CGGCAGCTTT  
2761 GATTTCGATA GCAGCATCGC CTGTTTCAGG CTGCTATGT GTGACTGTTG AGCTGTAACA  
2821 AGTTGTCTCA GGTGTTC AAT TTCATGTTCT AGTTGCTTTG TTTTACTGGT TTCACCTGTT  
2881 CTATTAGGTG TTACATGCTG TTCATCTGTT ACATTGTCGA TCTGTTTCATG GTGAACAGCT  
2941 TTg<sub>g</sub>AATGCAC CAAAACTCG TAAAAGCTCT GATGTATCTA TCTTTTTTAC ACCGTTTTCA  
3001 TCTGTGCATA TGGACAGTTT TCCCTTTGAT ATg<sub>g</sub>TAACGGT GAACAGTTGT TCTACTTTTG  
3061 TTTGTTAGTC TTGATGCTTC ACTGATAGAT ACAAGAGCCA TAAGAACCTC AGATCCTTCC  
3121 GTATTTAGCC AGTATGTTCT CTAGTGTGGT TCGTTGTTTT TCGGTGAGCC ATGAGAACGA  
3181 ACCATTGAGA TCATa<sub>CTT</sub> TTTGCATGC ACTCAAAAAT TTTGCCTCAA AACTGGTGAG  
3241 CTGAATTTTT GCAGTTAAAG CATCGTGTAG TGTTTTTCTT AGTCCGTTA<sub>t</sub> GTAGGTAGGA  
3301 ATCTGATGTA ATGGTTGTTG GTATTTTGTG ACCATTCAAT TTTATCTGGT TGTCTCAAG  
3361 TTCGGTTACG AGATCCATTT GTCTATCTAG TTCAACTTGG AAAATCAACG TATCAGTCGG  
3421 GCGGCCTCGC TTATCAACCA CCAATTTTCT ATTGCTGTAA GTGTTTAAAT CTTTACTTAT  
3481 TGGTTTCAAA ACCCATTGGT TAAGCCTTTT AAACCTCATG TAGTTATTTT CAAGCATTAA  
3541 CATGAACTTA AATTCATCAA GGCTAATCTC TATATTTGCC TTGTGAGTTT TCTTTTGTGT  
3601 TAGTTCTTTT AATAACCACT CATAAATCCT CATAGAGTAT TTGTTTTCAA AAGACTTAAC  
3661 ATGTTCCAGA TTATATTTTA TGAATTTTTT TAACTGAAA AGATAAGGCA ATATCTCTTC  
3721 ACTAAAAACT AATTCTAATT TTTCGCTTGA GAACTGGCA TAGTTGTCC ACTGAAAAAT  
3781 CTCAAAGCCT TTAACCAAAG GATTCCGTAT TTCCACAGTT CTCGTCATCA GCTCTCTGGT  
3841 TGCTTTAGCT AATACCCAT AAGCATTTTC CCTACTGATG TTCATCATCT GAGCGTATTG  
3901 GTTATAAGTG AACGATACCG TCCGTTCTTT CCTTGTAGGG TTTTCAATCG TGGGGTTGAG  
3961 TAGTGCCACA CAGCATAAAA TTAGCTTGGT TTCATGCTCC GTTAAGTCAT AGCGACTAAT  
4021 CGCTAGTTCA TTTGCTTTGA AAACAATAA TTCAGACATA CATCTCAATT GGTCTAGGTG  
4081 ATTTTAATCA CTATACCAAT TGAGATGGGC TAGTCAATGA TAATTAAGTAG TCCTTTTCTC  
4141 TTGAGTTGTG GGTATCTGTA AATTCTGCTA GACCTTTGCT GGAAAACTTG TAAATTCTGC  
4201 TAGACCCTCT GTAATTCG CTAG

//

LOCUS mJAG100 4260 bp ds-DNA circular 28-JUL-2022

DEFINITION .

FEATURES Location/Qualifiers  
terminator complement(10..104)  
/label="lambda t0 terminator"  
CDS complement(116..907)  
/label="specR"  
misc\_feature 1070..1103  
/label="J23101 mutant (Weak Constitutive Promoter)"  
RBS 1123..1136  
/label="BBa\_B0031 (RBS)"  
misc\_feature 1138..1794  
/label="CmR"  
Degradation Tag 1795..1827  
/label="LAA-ssrA tag"  
misc\_feature 1834..1894  
/label="Terminator L3S2P21 (synthetic, strong)"  
terminator 1918..2015  
/label="rrnB T1 terminator"  
CDS complement(2561..3508)  
/label="repA"  
rep\_origin complement(3892..4253)  
/label="pSC101 ori"

ORIGIN

1 AGTGCTTGGG TTCTACCAA TAAAAAACGC CCGGCGGCAA CCGAGCGTTC TGAACAAATC  
61 CAGATGGAGT TCTGAGGTCA TTAAGGATC TATCAACAGG AGTCCAAGCG AGCTCTTATT  
121 TGCCGACTAC CTTGGTGATC TCGCCTTTCA CGTAGTGGAC AAATCTTCC AACTGATCTG  
181 CGCGCGAGGC CAAGCGATCT TCTTCTGTC CAAGATAAGC CTGTCTAGCT TCAAGTATGA  
241 CGGGCTGATA CTGGGCCGGC AGGCGCTCCA TTGCCAGTC GGCAGCGACA TCCTTCGGCG  
301 CGATTTTGCC GGTACTGCG CTGTACCAA TGCGGGACAA CGTAAGCACT ACATTCGCT  
361 CATCGCCAGC CCAGTCGGGC GCGGAGTTC ATAGCGTTAA GGTTCATTT AGCGCTCAA  
421 ATAGATCTG TTCAGGAACC GGATCAAAGA GTTCTCCGC CGCTGGACCT ACCAAGGCAA  
481 CGCTATGTT TCTTGCTTTT GTCAGCAAGA TAGCCAGATC AATGTCGATC GTGGCTGGCT  
541 CGAAGATACC TGCAAGAATG TCATTGCGCT GCCATTCTCC AAATGTCAGT TCGCGCTTAG  
601 CTGGATAACG CCACGGAATG ATGTCGTCGT GCACAACAAT GGTGACTTCT ACAGCGCGGA  
661 GAATCTCGCT CTCTCCAGGG GAAGCCGAAG TTTCCAAAAG GTCGTTGATC AAAGCTCGCC  
721 GCGTTGTTTC ATCAAGCCTT ACGGTCACCG TAACCAGCAA ATCAATATCA CTGTGTGGCT  
781 TCAGGCCGCC ATCCACTGCG GAGCCGTACA AATGTACGGC CAGCAACGTC GGTTCGAGAT  
841 GCGCTCGAT GACGCCAACT ACCTCTGATA GTTGTAGTCG TACTTCGGCG ATCACCGCTT  
901 CCCTCATGCG AAACGATCCT CATCTGTCT CTGATCAGA TATTGATCCC CTGCGCCATC  
961 AGATCCTTGG CGGCAAGAAA GCCATCCAGT TACTTTGCA GGGCTCCCA ACCTACCAG  
1021 AGGGCGCCCC AGTGGCAAT TCCGACGTCg cggcgcgaa GACATAGGGt ttacagctag  
1081 ctcaagtcta ggtatatgct agcAGCGATA ACAAACCTTG ACTCACACAG GAAACCAATG  
1141 GAGAAAAAAA TCACTGGATA TACCACGTT GATATATCCC AATGGCATCG TAAAGAACAT  
1201 TTTGAGGCAT TTCAGTCAGT TGCTCAATGT ACCTATAACC AGACCGTTCA GCTGGATATT  
1261 ACGGCCTTTT TAAAGACCGT AAAGAAAAAT AAGCACAAGT TTTATCCGGC CTTTATTAC  
1321 ATTCTTGCCC GCCTGATGAA TGCTCATCCG GAATTCGTA TGGCAATGAA AGACGGTGAG  
1381 CTGGTGATAT GGGATAGTGT TCACCCTTGT TACACCGTTT TCCATGAGCA AACTGAAACG  
1441 TTTTCATGCG TCTGGAGTGA ATACCACGAC GATTTCCGGC AGTTTCTACA CATATATTG  
1501 CAAGATGTGG CGTGTTAatG TGA AACCTG GCCTATTTCC CTAAGGGTT TATTGAGAAT  
1561 ATGTTTTTCG TCTCAGCAA TCCCTGGGTG AGTTTCACCA GTTTTGATTT AAACGTGGCC  
1621 AATATGGACA ACTTCTTCGC CCCCGTTTC ACCATGGGCA AATATTATAC GCAAGGCGAC  
1681 AAGGTGCTGA TGCCGCTGGC GATTACAGTT CATCATGCCG TtGTGATGG CTTCCATGTC  
1741 GGCAGAATGC TTAATGAATT ACAACAGTAC TGCGATGAGT GGCAGGGCGG GGCgGCTGct  
1801 aacgacgaaa actacgctct ggctgctTAG TAACTCGGTA CCAAATTTCA GAAAAGAGGC  
1861 CTCCCGAAAG GGGGGCCTTT TTTCGTTTTG GTCCAAATGT CTTcgggccc gcTCTAGAGG  
1921 CATCAAATAA AACGAAAGGC TCAGTCGAAA GACTGGGCCT TTCGTTTTAT CTGTTGTTT  
1981 TCGGTGAACG CTCTCCTGAG TAGGACAAAT CCGCCGCCCT AGACCTAGCT GCAGCTAGGG  
2041 TACGGGTTTT GCTGCCGCA AACGGGCTGT TCTGGTGTG CTAGTTTGT ATCAGAAATCG  
2101 CAGATCCGGC TTCAGcggGT TTGCCGGCTG AAAGCGCTAT TTCTCCAGA ATTGCCATGA  
2161 TTTTTTCCCC ACGGGAGGCG TCACTGGCTC CCGTGTGTG GGCAGCTTTG ATTCGATAAG  
2221 CAGCATCGCC TGTTTCAGGC TGCTATGTG TGACTGTTGA GCTGTAACAA GTTGTCTCAG



2281 GTGTTCAATT TCATGTTCTA GTTGCTTTGT TTTACTGGTT TCACCTGTTC TATTAGGTGT  
 2341 TACATGCTGT TCATCTGTTA CATTGTCGAT CTGTTTCATGG TGAACAGCTT TgAATGCACC  
 2401 AAAAACTCGT AAAAGCTCTG ATGTATCTAT CTTTTTACA CCGTTTTCAT CTGTGCATAT  
 2461 GGACAGTTTT CCCTTTGATA TgTAACGGTG AACAGTTGTT CTACTTTTGT TTGTTAGTCT  
 2521 TGATGCTTCA CTGATAGATA CAAGAGCCAT AAGAACCTCA GATCCTTCCG TATTTAGCCA  
 2581 GTATGTTCTC TAGTGTGGTT CGTTGTTTTT GCGTGAGCCA TGAGAACGAA CCATTGAGAT  
 2641 CATaCTTACT TTGCATGTCA CTCAAAAATT TTGCCTCAA ACTGGTGAGC TGAATTTTTG  
 2701 CAGTTAAAGC ATCGTGTAGT GTTTTTCTTA GTCCGTTA+G TAGGTAGGAA TCTGATGTAA  
 2761 TGGTTGTTGG TATTTTGTCA CCATTCATTT TTATCTGGTT GTTCTCAAGT TCGGTTACGA  
 2821 GATCCATTG TCTATCTAGT TCAACTTGA AAATCAACGT ATCAGTCGGG CGGCCTCGCT  
 2881 TATCAACCAC CAATTTTCA TTGCTGTAAG TGTTTAAATC TTTACTTATT GGTTTCAAAA  
 2941 CCCATTGGTT AAGCCTTTTA AACTCATGGT AGTTATTTT AAGCATTAA ATGAACTTAA  
 3001 ATTCATCAAG GCTAATCTCT ATATTTGCCT TGTGAGTTTT CTTTTGTGTT AGTTCTTTTA  
 3061 ATAACCACTC ATAAATCTC ATAGAGTATT TGTTTTCAA AGACTTAA CA TGTTCCAGAT  
 3121 TATATTTTAT GAATTTTTT AACTGGAAAA GATAAGGCAA TATCTCTCA CTA AAAACTA  
 3181 ATTCATAATT TTCGCTGAG AACTTGGCAT AGTTTGTCCA CTGAAAAATC TCAAAGCCTT  
 3241 TAACCAAAGG ATTCCTGATT TCCACAGTTC TCGTCATCAG CTCTCTGTT GCTTAGCTA  
 3301 ATACACCATA AGCATTTTCC CTA CTGATGT TCATCATCTG AGCGTATTGG TTATAAGTGA  
 3361 ACGATAACCGT CCGTTCCTTC CTGTAGGGT TTTCAATCGT GGGGTTGAGT AGTGCCACAC  
 3421 AGCATAAAAT TAGCTTGGTT TCATGCTCCG TTAAGTCATA GCGACTAATC GCTAGTTCAT  
 3481 TTGCTTTGAA AACAACTAAT TCAGACATAC ATCTCAATTG GTCTAGGTGA TTTTAATCAC  
 3541 TATACCAATT GAGATGGGCT AGTCAATGAT AATTACTAGT CCTTTTCCTT TGAGTTGTGG  
 3601 GTATCTGTAA ATTCTGCTAG ACCTTTGCTG GAAAACTTGT AAATCTGCT AGACCCTCTG  
 3661 TAAATTCCGC TAGACCTTTG TGTGTTTTT TTGTTTATAT TCAAGTGGTT ATAATTTATA  
 3721 GAATAAAGAA AGAATAAAAA AAGATAAAAA GAATAGATCC CAGCCCTGTG TATAACTCAC  
 3781 TACTTTAGTC AGTTCGCGAG TATTACAAAA GGATGTCGCA AACGCTGTTT GCTCCTCTAC  
 3841 AAAACAGACC TTA AAAACCT AAAGGCTTAA GTAGCACCT CGCAAGCTCG GGCAAAATCGC  
 3901 TGAATATTCC TTTTGTCTCC GACCATCAGG CACCTGAGTC GCTGTCTTTT TCGTGACATT  
 3961 CAGTTCGCTG CGCTCACGGC TCTGGCAGTG AATGGGGTA AATGGCACTA CAGGCGCCTT  
 4021 TTATGGATTC ATGCAAGGAA ACTACCCATA ATACAAGAAA AGCCCGTCAC GGGCTTCTCA  
 4081 GGGCGTTTTA TGGCGGTCT GCTATGTGGT GCTATCTGAC TTTTGTGCT TCAGCAGTTC  
 4141 CTGCCCTCTG ATTTTCCAGT CTGACCACTT CGGATTATCC CGTGACAGGT CATTAGACT  
 4201 GGCTAATGCA CCCAGTAAGG CAGCGGTATC ATCAACAGGC TTACCCGTCT TACTGTCCCT

//

LOCUS mJAG101 4223 bp ds-DNA circular 28-JUL-2022

DEFINITION .

FEATURES Location/Qualifiers  
terminator complement(9..103)  
/label="lambda t0 terminator"  
CDS complement(115..906)  
/label="specR"  
misc\_feature 1069..1102  
/label="J23101 mutant (Weak Constitutive Promoter)"  
RBS 1122..1134  
/label="BBa\_B0032 (RBS)"  
CDS 1136..1795  
/label="CmR"  
misc\_feature 1796..1856  
/label="Terminator L3S2P21 (synthetic, strong)"  
terminator 1880..1977  
/label="rrnB T1 terminator"  
CDS complement(2523..3470)  
/label="repA"  
rep\_origin complement(3854..4215)  
/label="pSC101 ori"

ORIGIN

1 GTGCTTGAT TCTACCAAT AAAAAACGCC CGGCGGCAAC CGAGCGTTCT GAACAAATCC  
61 AGATGGAGTT CTGAGGTCAT TACTGGATCT ATCAACAGGA GTCCAAGCGA GCTCTTATTT  
121 GCCGACTACC TTGGTGATCT CGCCTTTCAC GTAGTGGACA AATTCTTCCA ACTGATCTGC  
181 GCGCGAGGCC AAGCGATCTT CTCTTGTGCC AAGATAAGCC TGTCTAGCTT CAAGTATGAC  
241 GGGCTGATAC TGGGCCGGCA GCGCTCCAT TGCCAGTCG GCAGCGACAT CCTCGGGCGC  
301 GATTTTCCG GTTACTGCGC TGTACCAAAT GCGGGACAAC GTAAGCACTA CATTTCGCTC  
361 ATCGCCAGCC CAGTCGGGCG GCGAGTTCCA TAGCGTTAAG GTTTCATTTA GCGCCTCAAA  
421 TAGATCTGTG TCAGGAACCG GATCAAAGAG TTCTCCGCC GCTGGACCTA CCAAGGCAAC  
481 GCTATGTTCT CTTGCTTTTG TCAGCAAGAT AGCCAGATCA ATGTCGATCG TGGCTGGCTC  
541 GAAGATACCT GCAAGAATGT CATTGCGCTG CCATTCTCCA AATTGCAGTT CGCGCTTAGC  
601 TGGATAACGC CACGGAATGA TGTCGTCGTG CACAACAATG GTGACTTCTA CAGCGCGGAG  
661 AATCTCGCTC TCTCCAGGGG AAGCCGAAGT TTCCAAAAGG TCGTTGATCA AAGCTCGCCG  
721 CGTTGTTTCA TCAAGCCTTA CGGTCACCGT AACCCAGCAA TCAATATCAC TGTGTGGCTT  
781 CAGGCCGCCA TCCACTGCGG AGCCGTACAA ATGTACGGCC AGCAACGTCG GTTCGAGATG  
841 GCGCTCGATG ACGCCAATA CCTCTGATAG TTGAGTCGAT ACTTCGGCGA TCACCGCTTC  
901 CCTCATCGGA AACGATCCTC ATCCTGTCTC TTGATCAGAT ATTGATCCCC TCGGCCATCA  
961 GATCCTTGGC GGAAGAAAAG CCATCCAGTT TACTTTGCAG GGCTTCCCAA CCTTACCAGA  
1021 GGGCGCCCA GCTGGCAATT CCGACGTCgc ggccgcaag ACATAGGgtt tacagctagc  
1081 tcagtcctag gtatatgcta gcAGCGATAA CAACTTTGA CTCACACAGG AAAGAATGGA  
1141 GAAAAAATC ACTGGATATA CCACCGTTGA TATATCCAA TGGCATCGTA AAGAACATTT  
1201 TGAGGCATTT CAGTCAGTTG CTCAATGTAC CTATAACCAG ACCGTTCCAG TGGATATTAC  
1261 GGCCTTTTTA AAGACCGTAA AGAAAAATAA GCACAAGTTT TATCCGGCCT TTATTACAT  
1321 TCTTGCCCGC CTGATGAATG CTCATCCGGA ATTTGATATG GCAATGAAAG ACGGTGAGCT  
1381 GGTGATATGG GATAGTGTTC ACCCTTGTTA CACCGTTTTC CATGAGCAAA CTGAAACGTT  
1441 TTCATCGCTC TGGAGTGAAT ACCACGACGA TTCCGGCAG TTTCTACACA TATATTGCGA  
1501 AGATGTGCGC TGTTAtGGTG AAAACCTGGC CTATTTCCCT AAAGGGTTTA TTGAGAATAT  
1561 GTTTTTCGTC TCAGCCAATC CCTGGGTGAG TTCCACAGT TTTGATTTAA ACGTGGCCAA  
1621 TATGGACAAC TTCTTCGCCC CCGTTTTTTC CATGGGCAAA TATTATACGC AAGGCGACAA  
1681 GGTGCTGATG CCGCTGGCGA TTCAGGTTCA TCATGCCGTt TGTGATGGCT TCCATGTGCG  
1741 CAGAATGCTT AATGAATTAC AACAGTACTG CGATGAGTGG CAGGGCGGGG CGTAACTCGG  
1801 TACCAAATTC CAGAAAAGAG GCCTCCCGAA AGGGGGGCCT TTTTTCGTTT TGGTCCAAAT  
1861 GTCTTCgcg cgcTCTAGA GGCATCAAAT AAAACGAAAAG GCTCAGTCGA AAGACTGGGC  
1921 CTTTCGTTTT ATCTGTTGTT TGTCGGTGAA CGCTCTCCTG AGTAGGACAA ATCCGCCGCC  
1981 CTAGACCTAG CTGACGCTAG GGTACGGGTT TTGCTGCCCG CAAACGGGCT GTTCTGGTGT  
2041 TGCTAGTTTG TTATCAGAAT CGCAGATCCG GCTTCAGccg GTTTGCCGGC TGAAAGCGCT  
2101 ATTTCTTCCA GAATTGCCAT GATTTTTTCC CCACGGGAGG CGTCACTGGC TCCCGTGTG  
2161 TCGGCAGCTT TGATTCGATA AGCAGCATCG CCTGTTTCAG GCTGTCTATG TGTGACTGTT  
2221 GAGCTGTAAC AAGTTGTCTC AGGTGTTCAA TTTCATGTTT TAGTTGCTTT GTTTTACTGG  
2281 TTTACCTGT TCTATTAGGT GTTACATGCT GTTCATCTGT TACATTGTCG ATCTGTTTAT  
2341 GGTGAACAGC TTTgAATGCA CCAAAAACTC GTAAAAGCTC TGATGTATCT ATCTTTTTTA

2401 CACCGTTTTTC ATCTGTGCAT ATGGACAGTT TTCCTTTGA TATgTAACGG TGAACAGTTG  
2461 TTCTACTTTT GTTTGTAGT CTTGATGCTT CACTGATAGA TACAAGAGCC ATAAGAACCT  
2521 CAGATCCTTC CGTATTTAGC CAGTATGTTT TCTAGTGTGG TTCGTTGTTT TTGCGTGAGC  
2581 CATGAGAACG AACCATGAG ATCATaCTTA CTTTGCATGT CACTCAAAAA TTTTGCCTCA  
2641 AAACCTGGTGA GCTGAATTTT TGCAGTAAA GCATCGTGA GTGTTTTTCT TAGTCCGTTA  
2701 tGTAGGTAGG AATCTGATGT AATGGTTGTT GGTATTTTGT CACCATTCA TTTTATCTGG  
2761 TTGTTCTCAA GTTCGGTTAC GAGATCCATT TGTCTATCTA GTTCAACTG GAAAAACAAC  
2821 GTATCAGTCG GCGGCCTCG CTTATCAACC ACCAATTCA TATTGCTGTA AGTGTTTAAA  
2881 TCTTTACTTA TTGGTTTCAA AACCCATTGG TTAAGCCTTT TAAACTCATG GTAGTTATTT  
2941 TCAAGCATTa ACATGAACTT AAATTCATCA AGGCTAATCT CTATATTTGC CTTGTGAGTT  
3001 TTCTTTTGTG TTAGTTCTTT TAATAACCAC TCATAAATCC TCATAGAGTA TTTGTTTCA  
3061 AAAGACTTAA CATGTTCCAG ATTATATTTT ATGAATTTT TTAAGTGGAA AAGATAAGGC  
3121 AATATCTCTT CACTAAAAAC TAATTCATTA TTTTCGCTTG AGAACTTGGC ATAGTTTGTG  
3181 CACTGAAAAA TCTCAAAGCC TTTAACCAA GGATTCCTGA TTTCCACAGT TCTCGTCATC  
3241 AGCTCTCTGG TTGCTTTAGC TAATACACCA TAAGCATTTT CCCTACTGAT GTTCATCATC  
3301 TGAGCGTATT GGTATAAGT GAACGATACC GTCCGTTCTT TCCTTGTAGG GTTTTCAATC  
3361 GTGGGGTTGA GTAGTGCCAC ACAGCATAAA ATTAGCTTGG TTTCATGCTC CGTTAAGTCA  
3421 TAGCGACTAA TCGCTAGTTC ATTTGCTTTG AAAACAACCTA ATTCAGACAT ACATCTCAAT  
3481 TGGTCTAGGT GATTTTAATC ACTATACCAA TTGAGATGGG CTAGTCAATG ATAATTAATA  
3541 GTCCTTTTCC TTTGAGTTGT GGGTATCTGT AAATTCTGCT AGACCTTTGC TGGAAAACTT  
3601 GTAAATTCTG CTAGACCCTC TGTAATTTCC GCTAGACCTT TGTGTGTTTT TTTGTTTAT  
3661 ATTCAAGTGG TTATAATTTA TAGAATAAAG AAAGAATAAA AAAAGATAAA AAGAATAGAT  
3721 CCCAGCCCTG TGTATAACTC ACTACTTTAG TCAGTCCGC AGTATTACAA AAGGATGTCG  
3781 CAAACGCTGT TTGCTCCTCT ACAAACAGA CCTTAAACC CTAAAGGCTT AAGTAGCACC  
3841 CTCGCAAGCT CGGGCAAATC GCTGAATATT CCTTTTGTCT CCGACCATCA GGCACCTGAG  
3901 TCGCTGTCTT TTTGCTGACA TTCAGTTCGC TCGCTCAGC GCTCTGGCAG TGAATGGGGG  
3961 TAAATGGCAC TACAGGCGCC TTTTATGGAT TCATGCAAGG AAACCTACCA TAATACAAGA  
4021 AAAGCCCCTC ACGGGCTTCT CAGGGCGTTT TATGGCGGT CTGCTATGTG GTGCTATCTG  
4081 ACTTTTTGCT GTTCAGCAGT TCCTGCCCTC TGATTTTCCA GTCTGACCAC TTCGGATTAT  
4141 CCCGTGACAG GTCATTGAGA CTGGCTAATG CACCCAGTAA GGCAGCGGTA TCATCAACAG  
4201 GCTTACCCGT CTTACTGTCC CTA

//

LOCUS mJAG019 2240 bp ds-DNA circular 28-JUL-2022

DEFINITION .

FEATURES Location/Qualifiers  
terminator complement(51..145)  
/label="lambda t0 terminator"  
Antibiotic Resistance complement(175..1035)  
/label="AmpR"  
misc\_feature 1189..1192  
/label="Overhang D1"  
terminator 1193..1321  
/label="B0015 (Terminator)"  
misc\_feature 1322..1325  
/label="Overhang G"  
terminator 1348..1445  
/label="rrnB T1 terminator"  
rep\_origin complement(1583..2226)  
/label="colE1 ori"

ORIGIN

1 AGTGGAAACGA AAACCTCACGT TAAGGGATT TGGTCATGAC TAGTGCTTGG ATTCTCACCA  
61 ATAAAAAACG CCCGGCGGCA ACCGAGCGTT CTGAACAAAT CCAGATGGAG TTCTGAGGTC  
121 ATTACTGGAT CTATCAACAG GAGTCCAAGC GAGCTCGTAA ACTTGGTCTG ACAGTTACCA  
181 ATGCTTAATC AGTGAGGCAC CTATCTCAGC GATCTGTCTA TTTCGTTTTCAT CCATAGTTGC  
241 CTGACTCCCC GTCGTGTAGA TAACTACGAT ACGGGAGGGC TTACCATCTG GCCCCAGTGC  
301 TGCAATGATA CCGCGcgaCC CACGCTCACC GGCTCCAGAT TTATCAGCAA TAAACCAGCC  
361 AGCCGGAAGG GCCGAGCGCA GAAGTGGTCC TGCAACTTTA TCCGCCTCCA TCCAGTCTAT  
421 TAATTGTTGC CGGGAAGCTA GAGTAAGTAG TTCGCCAGTT AATAGTTTGC GCAACGTTGT  
481 TGCCATTGCT ACAGGCATCG TGGTGTCACG CTCGTCGTTT GGTATGGCTT CATTAGCTC  
541 CGGTTCCCAA CGATCAAGGC GAGTTACATG ATCCCCATG TTGTGCAAAA AAGCGGTTAG  
601 CTCCTTCGGT CCTCCGATCG TTGTCAGAAG TAAGTTGGCC GCAGTGTTAT CACTCATGGT  
661 TATGGCAGCA CTGCATAATT CTCTTACTGT CATGCCATCC GTAAGATGCT TTTCTGTGAC  
721 TGGTGAGTAC TCAACCAAGT CATTCTGAGA ATAGTGATG CGGCGACCGA GTTGCTCTTG  
781 CCCGGCGTCA ATACGGGATA ATACCGCGCC ACATAGCAGA ACTTTAAAAG TGCTCATCAT  
841 TGGAAAACGT TCTTCGGGGC GAAAACTCTC AAGGATCTTA CCGCTGTTGA GATCCAGTTC  
901 GATGTAACCC ACTCGTGCAC CCAACTGATC TTCAGCATCT TTTACTTTCA CCAGCGTTTC  
961 TGGGTGAGCA AAAACAGGAA GGCAAAATGC CGCAAAAAG GGAATAAGGG GCACACGGAA  
1021 ATGTTGAATA CTCATACTCT TCCTTTTCA ATATTATTGA AGCATTATC AGGGTTATTG  
1081 TCTCATGAGC GGATACATAT TTGAATGTAT TTAGAAAAAT AAACAAATAG GGGTCCGCG  
1141 CACATTTCCC CGAAAAGTGC CACCTGACGT CGcggcgcA GGGTCTCAGT AACcaggcat  
1201 caaataaaac gaaaggctca gtcgaaagac tgggcctttc gttttatctg ttgtttgtcg  
1261 gtgaacgctc tctactagag tcacactggc tcaccttcgg gtgggccttt ctgcgtttat  
1321 aGACATGAGA CCAAgcggcc gcTCTAGAGG CATCAAATAA AACGAAAGGC TCAGTCGAAA  
1381 GACTGGGCTT TTCGTTTTAT CTGTTGTTG TCGGTGAACG CTCTCCTGAG TAGGACAAAT  
1441 CCGCCGCCCT AGACCTAGCT GCAGCTAGG CGTTCGGCTG CGGCGAGCGG TATCAGCTCA  
1501 CTCAAAGCGG GTAATACGGT TATCCACAGA ATCAGGGGAT AACGCAGGAA AGAACATGTG  
1561 AGCAAAAAGC CAGCAAAAGG CCAGGAACCG TAAAAAGGCC GCGTTGCTGG CGTTTTTCCA  
1621 TAGGCTCCGC CCCCTGACG AGCATCACA AAATCGACGC TCAAGTCAGA GGTGGCGAAA  
1681 CCCGACAGGA CTATAAAGAT ACCAGGCGTT TCCCCTGGA AGCTCCCTCG TGCGCTCTCC  
1741 TGTTCCGACC CTGCCGTTA CCGGATACCT GTCCGCCTTT CTCCCTTCGG GAAGCGTGCC  
1801 GCTTTCTCat aGCTCACGCT GTAGGTATCT CAGTTCGGTG TAGGTCTGTT GCTCCAAGCT  
1861 GGGCTGTGTG CACGAACCCC CCGTTCAGCC CGACCGCTGC GCCTTATCCG GTAACATCG  
1921 TCTTGAGTCC AACCCGGTAA GACACGACTT ATCGCCACTG GCAGCAGCCA CTGGTAACAG  
1981 GATTAGCAGA GCGAGGTATG TAGGCGGTGC TACAGAGTTC TTGAAGTGGT GGCCTAACTA  
2041 CGGTACACT AGAAGGACAG TATTTGGTAT CTGCGCTCTG CTGAAGCCAG TTACCTTCGG  
2101 AAAAAGAGTT GGTAGCTCTT GATCCGGCAA ACAAACCACC GCTGGTAGCG GTGGTTTTTT  
2161 TGTTTGCAAG CAGCAGATTA CGCGCAGAAA AAAAGGATCT CAAGAAGATC CTTTGATCTT  
2221 TTCTACGGGG TCTGACGCTC

//

LOCUS mJAG168 3254 bp ds-DNA circular 28-JUL-2022

DEFINITION .

FEATURES Location/Qualifiers  
terminator 81..186  
/label="lambda T0 terminator"  
CDS complement(194..985)  
/label="specR"  
misc\_feature 1136..1139  
/label="Overhang A"  
misc\_feature 1140..1173  
/label="J23101 mutant (Weak Constitutive Promoter)"  
misc\_feature 1196..1199  
/label="Overhang B1"  
RBS 1215..1225  
/label="B0033 (RBS)"  
CDS 1232..1891  
/label="CmR"  
misc\_feature 1892..1952  
/label="Terminator L3S2P21 (synthetic, strong)"  
terminator 1969..2066  
/label="rrnB T1 terminator"  
rep\_origin 2533..3220  
/label="p15A ori"

ORIGIN

1 ATATTACTAG ATTTCAGTGC AATTTATCTC TTCAAATGTA GCACCTGAAG TCAGCCCCAT  
61 ACGATATAAG TTGTTACTAG TGCTTGGATT CTCACCAATA AAAAAACGCC GCGCGCAACC  
121 GAGCGTTCTG AACAAATCCA GATGGAGTTC TGAGGTCATT ACTGGATCTA TCAACAGGAG  
181 TCCAAGCGAG CTCTTATTTG CCGACTACCT TGGTGATCTC GCCTTTCACG TAGTGGACAA  
241 ATTCTTCCAA CTGATCTGCG CCGGAGGCCA AGCGATCTTC TTCTTGTCCTA AGATAAGCCT  
301 GTCTAGCTTC AAGTATGACG GGCTGATACT GGGCCGGCAG GCGCTCCATT GCCCAGTCGG  
361 CAGCGACATC CTTCCGGCGG ATTTTGCCGG TTA CTGCGCT GTACCAAATG CGGGACAACG  
421 TAAGCACTAC ATTTCCGCTCA TCGCCAGCCC AGTCGGGCGG CGAGTTCAT AGCGTTAAGG  
481 TTTCAATTTAG CGCCTCAAAT AGATCCTGTT CAGGAACCGG ATCAAAGAGT TCCTCCGCCG  
541 CTGGACCTAC CAAGGCAACG CTATGTTCTC TTGCTTTTGT CAGCAAGATA GCCAGATCAA  
601 TGTCGATCGT GGCTGGCTCG AAGATACCTG CAAGAATGTC ATTGCGCTGC CATTCTCCAA  
661 ATTGCAGTTC CCGCTTAGCT GGATAACGCC ACGGAATGAT GTCGTCGTGC ACAACAATGG  
721 TGACTTCTAC AGCGCGGAGA ATCTCGCTCT CTCCAGGGGA AGCCGAAGTT TCCAAAAGGT  
781 CGTTGATCAA AGCTCGCCG GTTGTTTCAT CAAGCCTTAC GGTCACCGTA ACCAGCAAAT  
841 CAATATCACT GTGTGGCTTC AGGCCGCCAT CCACTGCGGA GCCGTACAAA TGTACGGCCA  
901 GCAACGTCGG TTCGAGATGG CGCTCGATGA CGCCAACCTAC CTCTGATAGT TGAGTCGATA  
961 CTTCCGGGAT CACCGCTTCC CTCATGCGAA ACGATCCTCA TCCTGTCTCT TGATCAGATA  
1021 TTGATCCCCT GCGCCATCAG ATCCTTGGCG GCAAGAAAAGC CATCCAGTTT ACTTTGCAGG  
1081 GCTTCCCAAC CTTACCAGAG GCGGCCCCAG CTGGCAATTC CGACGTCGcg gccgcAGGGt  
1141 ttacagctag ctcagtccta ggtatatgct agcAAATTGT GAGCGGATAA CAATTATAGa  
1201 taacaaactt tgactcacac aggacTACTA AATGGAGAAA AAAATCACTG GATATACCAC  
1261 CGTTGATATA TCCCAATGGC ATCGTAAAGA ACATTTTGTG GCATTTTCAGT CAGTTGCTCA  
1321 ATGTACCTAT AACCGACCGG TTCAGCTGGA TATTACGGCC TTTTAAAGA CCGTAAAGAA  
1381 AAATAAGCAC AAGTTTTATC CGGCCTTTAT TCACATTCTT GCCCGCCTGA TGAATGCTCA  
1441 TCCGGAATTT CGTATGGCAA TGAAGACCGG TGAGCTGGTG ATATGGGATA GTGTTACCCC  
1501 TTGTTACACC GTTTTCCATG AGCAAACCTGA AACGTTTTCA TCGCTCTGGA GTGAATACCA  
1561 CGACGATTTT CCGCAGTTTC TACACATATA TTCGCAAGAT GTGGCGTGTT AtGGTGA AAA  
1621 CCTGGCCTAT TTCCTAAAG GGTATTATTGA GAATATGTTT TTCGTCTCAG CCAATCCCTG  
1681 GGTGAGTTTC ACCAGTTTTG ATTTAAACGT GGCCAATATG GACAACTTCT TCGCCCCGCT  
1741 TTTACCATG GGC AAATATT ATACGCAAGG CGACAAGGTG CTGATGCCGC TGGCGATTCA  
1801 GGTTCATCAT GCCGTtTG TG ATGGCTTCCA TGTCGGCAGA ATGCTTAATG AATTACAACA  
1861 GACTGCGAT GAGTGGCAGG GCGGGGCGTA ACTCGGTACC AAATTCAGA AAAGAGGCCCT  
1921 CCCGAAAGGG GGGCCTTTTT TCGTTTTGGT CCAAgcgcc gcCCTAGGAG GCATCAAATA  
1981 AAACGAAAGG CTCAGTCGAA AGACTGGGCC TTTCGTTTTA TCTGTTGTTT GTCGGTGAAC  
2041 GCTCTCCTGA GTAGGACAAA TCCGCCGCC TAGACCTAGC TGCAGCTAGG GTACGGGTTT  
2101 TGCTGCCCGC AACCGGGCTG TTCTGGTGT GCTAGTTTGT TATCAGAATC GCAGATCCGG  
2161 CTTAGcCGG TTTGCCGGCT GAAAGCGCTA TTTCTCCAG AATTGCCATG ATTTTTTCCC  
2221 CACGGGAGGC GTCAGTGGCT CCCGTGTTGT GCGCAGCTTT GATTCGATAA GCAGCATCGC

2281 CTGTTTCAGG CTGTCTATGT GTGACTGTTG AGCTGTAACA AGTTGTCTCA GGTGTTCAAT  
2341 TTCATGTTCT AGTTGCTTTG TTTTACTGGT TTCACCTGTT CTATTAGGTG TTACATGCTG  
2401 TTCATCTGTT ACATTGTCGA TCTGTTTCATG GTGAACAGCT TTgAATGCAC CAAAACTCG  
2461 TAAAAGCTCT GATGTATCTA TCTTTTTTAC ACCGTTTTCA TCTGTGcatg cApgaagcgg  
2521 cgcgCCCATA TGGGATATAT TCCGCTTCCT CGCTCACTGA CTCGCTACGC TCGGTCGTTT  
2581 GACTGCGGCG AGCGGAAATG GCTTACGAAC GGGGCGGAGA TTTCCCTGGAA GATGCCAGGA  
2641 AGATACTTAA CAGGGAAGTG AGAGGGCCGC GGCAAAGCCG TTTTCCATA GGCTCCGCCC  
2701 CCCTGACAAG CATCACGAAA TCTGACGCTC AAATCAGTGG TGGCGAAACC CGACAGGACT  
2761 ATAAAGATAC CAGGCGTTTC CCCCTGGCGG CTCCTCGTG CGCTCTCCTG TTCCTGCCTT  
2821 TCGGTTTACC GGTGTCATTG CGCTGTTATG GCCGCGTTTG TCTCATTCCA CGCCTGACAC  
2881 TCAGTTCCGG GTAGGCAGTT CGCTCCAAGC TGGACTGTAT GCACGAACCC CCCGTTCACT  
2941 CCGACCGCTG CGCCTTATCC GGTAAGTATC GTCTTGAGTC CAACCCGGAA AGACATGCAA  
3001 AAGCACCACT GGCAGCAGCC ACTGGTAATT GATTTAGAGG AGTTAGTCTT GAAGTCATGC  
3061 GCCGGTTAAG GCTAAACTGA AAGGACAAGT TTTGGTGACT GCGCTCCTCC AAGCCAGTTA  
3121 CCTCGGTTCA AAGAGTTGGT AGCTCAGAGA ACCTTCGAAA AACCGCCCTG CAAGGCGGTT  
3181 TTTTCGTTTT CAGAGCAAGA GATTACGCGC AGACCAAAC GATCTCAAGA AGATCATCTT  
3241 ATTAATCAGA TAAA

//

## References

- [1] B. G. Wong, C. P. Mancuso, S. Kiriakov, C. J. Bashor, A. S. Khalil, Precise, automated control of conditions for high-throughput growth of yeast and bacteria with eVOLVER. *Nature Biotechnology* **36**, 614–623 (2018).
- [2] F. Bertaux, S. Sosa-Carrillo, V. Gross, A. Fraisse, C. Aditya, M. Furstenheim, G. Batt, Enhancing bioreactor arrays for automated measurements and reactive control with ReacSight. *Nature Communications* **13**, 1–12 (2022).
- [3] E. Martinez-Salas, J. A. Martin, M. Vicente, Relationship of *Escherichia coli* density to growth rate and cell age. *Journal of Bacteriology* **147**, 97 (1981).
- [4] P. P. Dennis, H. Bremer, Modulation of Chemical Composition and Other Parameters of the Cell at Different Exponential Growth Rates. *EcoSal Plus* **3** (2008).
- [5] M. Scott, C. W. Gunderson, E. M. Mateescu, Z. Zhang, T. Hwa, Interdependence of Cell Growth and Gene Expression: Origins and Consequences. *Science* **330**, 1099–1102 (2010).
- [6] M. Scott, S. Klumpp, E. M. Mateescu, T. Hwa, Emergence of robust growth laws from optimal regulation of ribosome synthesis. *Molecular Systems Biology* **10**, 747 (2014).
- [7] C. You, H. Okano, S. Hui, Z. Zhang, M. Kim, C. W. Gunderson, Y.-P. Wang, P. Lenz, D. Yan, T. Hwa, Coordination of bacterial proteome with metabolism by cyclic AMP signalling. *Nature* **500**, 301–6 (2013).
- [8] J. B. Deris, M. Kim, Z. Zhang, H. Okano, R. Hermsen, A. Groisman, T. Hwa, The innate growth bistability and fitness landscapes of antibiotic-resistant bacteria. *Science* **342** (2013).
- [9] D. W. Erickson, S. J. Schink, V. Patsalo, J. R. Williamson, U. Gerland, T. Hwa, A global resource allocation strategy governs growth transition kinetics of *Escherichia coli*. *Nature* **551**, 119–123 (2017).
- [10] O. Borkowski, F. Ceroni, G. B. Stan, T. Ellis, Overloaded and stressed: whole-cell considerations for bacterial synthetic biology. *Current Opinion in Microbiology* **33**, 123–130 (2016).
- [11] F. Ceroni, R. Algar, G.-B. Stan, T. Ellis, Quantifying cellular capacity identifies gene expression designs with reduced burden. *Nature methods* **12**, 1–8 (2015).
- [12] A. Y. Weiße, D. A. Oyarzún, V. Danos, P. S. Swain, Mechanistic links between cellular trade-offs, gene expression, and growth. *Proceedings of the National Academy of Sciences of the United States of America* **112**, E1038–E1047 (2015).
- [13] R. Balakrishnan, M. Mori, I. Segota, Z. Zhang, R. Aebersold, C. Ludwig, T. Hwa, Principles of gene regulation quantitatively connect DNA to RNA and proteins in bacteria. *bioRxiv* p. 2021.05.24.445329 (2021).
- [14] C. Orelle, E. D. Carlson, T. Szal, T. Florin, M. C. Jewett, A. S. Mankin, Protein synthesis by ribosomes with tethered subunits. *Nature* **524**, 119–124 (2015).
- [15] R. Milo, P. Jorgensen, U. Moran, G. Weber, M. Springer, BioNumbers—the database of key numbers in molecular and cell biology. *Nucleic Acids Research* **38**, D750 (2010).
- [16] A. Baumschlager, S. K. Aoki, M. Khammash, Dynamic Blue Light-Inducible T7 RNA Polymerases (Opto-T7RNAPs) for Precise Spatiotemporal Gene Expression Control. *ACS Synthetic Biology* **6**, 2157–2167 (2017).
