# Supplementary material for: Dynamic cybergenetic control of bacterial co-culture composition via optogenetic feedback
Source: PubMed Central journal article supplement (PMC9381578; doi:10.1038/s41467-022-32392-z), 2022-08-16
Supplement: 41467_2022_32392_MOESM4_ESM.pdf [file 41467_2022_32392_MOESM4_ESM.pdf]

**Title:** Supplementary Software

**Description:** MATLAB scripts used to run simulations of the photophilic-constitutive co-culture, both in open-loop and closed-loop settings, as well as the optimization pipeline to determine the best PID gains for a closed-loop co-culture experiment.
